# Supplementary material for: Arbovirus Detection in Insect Vectors by Rapid, High-Throughput Pyrosequencing
Source: PLoS Negl Trop Dis. 2010 Nov 9;4(11):e878. doi: 10.1371/journal.pntd.0000878 (PMC2976685; doi:10.1371/journal.pntd.0000878)
Supplement: Table S2 — Expression values and other characteristics, such as length and uniqueness, of transcripts detected from sequencing N2173 library (5 DENV-1 infected mosquitoes) are listed. (1.79 MB XLS) [file pntd.0000878.s002.xls]

## Sheet: RNA-Seq
Feature ID	Expression values	Gene length	Unique gene reads	Total gene reads	RPKM
AAEL017413-RA	683170	400	643	643	683170		supercont1.440	esterase
AAEL017647-RA	49998.8	153	18	18	49998.8
AAEL017811-RA	41219.7	299	29	29	41219.7
AAEL017868-RA	24490.9	295	1	17	24490.9
AAEL017654-RA	16022.9	557	21	21	16022.9
AAEL001702-RA	12426.6	513	15	15	12426.6
AAEL017571-RA	7841.13	1897	14	35	7841.13
AAEL017247-RA	6745.86	189	3	3	6745.86
AAEL016633-RA	5902.63	72	0	1	5902.63
AAEL016690-RA	5902.63	72	0	1	5902.63
AAEL017096-RA	5190.24	1392	17	17	5190.24
AAEL017841-RA	5182.8	164	2	2	5182.8
AAEL017826-RA	5182.8	164	1	2	5182.8
AAEL017652-RA	5076.66	586	7	7	5076.66
AAEL017119-RA	4918.86	432	5	5	4918.86
AAEL017638-RA	4521.16	282	3	3	4521.16
AAEL016995-RA	4271.25	1990	20	20	4271.25
AAEL017516-RB	4094.31	1557	9	15	4094.31
AAEL003396-RA	4086.44	624	6	6	4086.44
AAEL011656-RA	4003.04	637	6	6	4003.04
AAEL002534-RA	3102.11	959	7	7	3102.11
AAEL005817-RA	3018.39	704	5	5	3018.39
AAEL013097-RA	2737.45	621	3	4	2737.45
AAEL001703-RA	2664.51	957	6	6	2664.51
AAEL005451-RA	2650.66	481	3	3	2650.66
AAEL017646-RA	2591.4	164	1	1	2591.4
AAEL017931-RA	2591.4	164	1	1	2591.4
AAEL009747-RA	2370.93	717	4	4	2370.93
AAEL009341-RA	2202.02	579	3	3	2202.02
AAEL017748-RA	2179.43	195	0	1	2179.43
AAEL017825-RA	2179.43	195	0	1	2179.43
AAEL001759-RA	2168.31	588	3	3	2168.31
AAEL017915-RA	2164.63	589	3	3	2164.63
AAEL011447-RA	2070.59	821	4	4	2070.59
AAEL017851-RA	2014.17	211	1	1	2014.17
AAEL012686-RA	1972.11	862	4	4	1972.11
AAEL010821-RA	1958.48	1302	6	6	1958.48
AAEL004149-RA	1950.94	6753	31	31	1950.94
AAEL005172-RA	1914.37	222	1	1	1914.37
AAEL017506-RA	1855.85	916	4	4	1855.85
AAEL004151-RE	1831.85	464	2	2	1831.85
AAEL007114-RA	1830.86	1857	8	8	1830.86
AAEL004851-RA	1770.79	240	1	1	1770.79
AAEL002470-RA	1706.78	249	1	1	1706.78
AAEL012620-RA	1671.54	1017	4	4	1671.54
AAEL013694-RA	1647.25	1032	2	4	1647.25
AAEL006229-RA	1539.82	552	2	2	1539.82
AAEL003872-RA	1507.05	1410	5	5	1507.05
AAEL017116-RA	1491.19	1995	0	7	1491.19
AAEL002845-RA	1460.44	291	1	1	1460.44
AAEL005097-RA	1450.48	586	2	2	1450.48
AAEL010097-RA	1449.98	2931	10	10	1449.98
AAEL017406-RA	1445.54	294	1	1	1445.54
AAEL017590-RA	1440.64	295	0	1	1440.64
AAEL005629-RA	1368.73	621	2	2	1368.73
AAEL011197-RA	1363.02	1559	1	5	1363.02
AAEL004175-RA	1347.03	631	2	2	1347.03
AAEL006698-RA	1344.9	632	2	2	1344.9
AAEL002491-RA	1299.66	327	1	1	1299.66
AAEL006860-RA	1266.73	671	2	2	1266.73
AAEL003427-RA	1262.97	673	2	2	1262.97
AAEL001863-RA	1261.1	1348	4	4	1261.1
AAEL008329-RA	1246.3	682	2	2	1246.3
AAEL002258-RA	1231.85	1725	5	5	1231.85
AAEL015684-RA	1223.58	1042	3	3	1223.58
AAEL010810-RA	1200.53	708	2	2	1200.53
AAEL005266-RB	1180.53	720	0	2	1180.53
AAEL000987-RA	1172.92	1087	3	3	1172.92
AAEL015064-RB	1164.35	730	1	2	1164.35
AAEL007477-RA	1161.17	732	2	2	1161.17
AAEL017898-RA	1154.86	368	1	1	1154.86
AAEL014943-RA	1152.77	1106	3	3	1152.77
AAEL004503-RA	1136.34	374	1	1	1136.34
AAEL008581-RB	1134.82	749	2	2	1134.82
AAEL015682-RA	1133.31	375	1	1	1133.31
AAEL003826-RA	1133.31	375	0	1	1133.31
AAEL003818-RA	1133.31	375	0	1	1133.31
AAEL015679-RA	1133.31	375	0	1	1133.31
AAEL004481-RA	1074.56	791	2	2	1074.56
AAEL009786-RA	1073.88	1583	4	4	1073.88
AAEL005901-RB	1065.14	1596	2	4	1065.14
AAEL000718-RA	1053.26	807	2	2	1053.26
AAEL013536-RA	1049.36	810	2	2	1049.36
AAEL003659-RA	1034.04	411	1	1	1034.04
AAEL011572-RA	1030.28	825	1	2	1030.28
AAEL003687-RA	1021.61	416	1	1	1021.61
AAEL017180-RA	1001.15	849	2	2	1001.15
AAEL013221-RC	982.634	865	1	2	982.634
AAEL007818-RA	969.189	877	0	2	969.189
AAEL006556-RA	968.821	1316	3	3	968.821
AAEL007818-RB	963.695	882	0	2	963.695
AAEL009859-RA	945.261	2248	5	5	945.261
AAEL004155-RA	944.421	450	1	1	944.421
AAEL012326-RA	944.421	450	1	1	944.421
AAEL000795-RA	925.903	918	0	2	925.903
AAEL004726-RA	919.89	462	1	1	919.89
AAEL012585-RB	917.904	926	1	2	917.904
AAEL004978-RA	915.925	2320	5	5	915.925
AAEL002372-RC	906.161	938	0	2	906.161
AAEL003060-RA	904.233	940	2	2	904.233
AAEL000868-RA	902.313	471	1	1	902.313
AAEL000442-RA	890.963	1431	3	3	890.963
AAEL011255-RA	868.211	1958	4	4	868.211
AAEL011414-RD	865.559	1473	0	3	865.559
AAEL009962-RA	855.971	993	2	2	855.971
AAEL009160-RA	848.282	1002	0	2	848.282
AAEL005261-RA	840.731	1011	2	2	840.731
AAEL017077-RA	835.771	1017	0	2	835.771
AAEL003942-RA	830.057	512	1	1	830.057
AAEL014583-RA	825.222	515	1	1	825.222
AAEL002875-RA	821.236	1035	2	2	821.236
AAEL010325-RA	815.719	521	1	1	815.719
AAEL009964-RA	803.383	529	1	1	803.383
AAEL002737-RB	800.357	531	0	1	800.357
AAEL010169-RA	779.797	545	0	1	779.797
AAEL000679-RA	778.369	546	1	1	778.369
AAEL017605-RA	778.369	546	1	1	778.369
AAEL000032-RC	775.882	2191	0	4	775.882
AAEL006576-RA	770.606	1103	0	2	770.606
AAEL007771-RB	761.63	558	0	1	761.63
AAEL006259-RA	759.588	1119	2	2	759.588
AAEL002337-RB	750.865	566	0	1	750.865
AAEL010573-RB	741.692	573	0	1	741.692
AAEL004855-RA	739.97	1723	3	3	739.97
AAEL000138-RA	737.829	576	1	1	737.829
AAEL014838-RA	736.55	577	0	1	736.55
AAEL013069-RA	732.74	1160	2	2	732.74
AAEL014281-RA	730.85	1163	1	2	730.85
AAEL001558-RA	730.222	582	1	1	730.222
AAEL017902-RA	726.478	585	1	1	726.478
AAEL009653-RA	725.238	586	1	1	725.238
AAEL010316-RA	717.887	1184	2	2	717.887
AAEL017835-RA	717.887	592	1	1	717.887
AAEL014903-RA	711.875	597	0	1	711.875
AAEL000032-RB	708.316	1200	0	2	708.316
AAEL009313-RA	703.043	1209	2	2	703.043
AAEL004429-RA	694.427	612	1	1	694.427
AAEL014583-RB	693.294	613	0	1	693.294
AAEL003404-RB	689.358	2466	1	4	689.358
AAEL006511-RA	686.574	619	1	1	686.574
AAEL000823-RA	686.574	619	0	1	686.574
AAEL004325-RA	679.983	1250	2	2	679.983
AAEL008679-RB	676.017	1886	0	3	676.017
AAEL005277-RA	675.659	1887	3	3	675.659
AAEL010977-RA	673.784	2523	4	4	673.784
AAEL001061-RC	668.222	636	1	1	668.222
AAEL001872-RA	657.369	1293	2	2	657.369
AAEL001420-RA	656.608	2589	4	4	656.608
AAEL017455-RA	655.174	1946	3	3	655.174
AAEL009384-RA	653.327	1301	2	2	653.327
AAEL013262-RA	651.824	652	1	1	651.824
AAEL013941-RB	649.334	1309	1	2	649.334
AAEL014583-RC	648.839	655	0	1	648.839
AAEL012437-RB	645.881	658	0	1	645.881
AAEL010258-RC	643.923	660	0	1	643.923
AAEL013272-RA	641.978	662	1	1	641.978
AAEL012252-RA	641.01	663	1	1	641.01
AAEL004484-RA	639.563	1329	2	2	639.563
AAEL015467-RA	636.212	1336	2	2	636.212
AAEL004450-RA	634.313	670	1	1	634.313
AAEL008353-RA	632.425	672	0	1	632.425
AAEL000353-RA	629.614	675	1	1	629.614
AAEL012437-RA	622.239	683	1	1	622.239
AAEL005727-RA	619.067	1373	2	2	619.067
AAEL007761-RA	614.442	2075	3	3	614.442
AAEL006890-RA	614.442	2075	3	3	614.442
AAEL005332-RA	607.996	1398	2	2	607.996
AAEL004567-RA	595.223	2142	3	3	595.223
AAEL015151-RA	594.807	1429	2	2	594.807
AAEL002411-RB	591.084	1438	0	2	591.084
AAEL009913-RA	588.628	2166	3	3	588.628
AAEL007973-RA	587.002	724	1	1	587.002
AAEL008785-RA	584.58	727	1	1	584.58
AAEL001401-RA	583.376	1457	2	2	583.376
AAEL010760-RA	579.005	734	1	1	579.005
AAEL012987-RA	575.347	2216	3	3	575.347
AAEL013264-RA	573.148	1483	2	2	573.148
AAEL002927-RA	571.222	744	1	1	571.222
AAEL008088-RA	562.155	756	1	1	562.155
AAEL011689-RA	559.933	759	0	1	559.933
AAEL001359-RA	559.197	1520	2	2	559.197
AAEL009283-RA	558.462	761	1	1	558.462
AAEL006772-RA	557.363	1525	2	2	557.363
AAEL005228-RA	555.542	765	1	1	555.542
AAEL010446-RA	553.372	768	0	1	553.372
AAEL017514-RA	552.652	769	1	1	552.652
AAEL016980-RA	551.934	770	1	1	551.934
AAEL001414-RB	549.792	1546	0	2	549.792
AAEL009825-RA	549.792	773	1	1	549.792
AAEL012736-RD	546.962	777	1	1	546.962
AAEL013533-RA	544.858	780	1	1	544.858
AAEL010786-RA	543.812	1563	1	2	543.812
AAEL013359-RA	542.771	2349	0	3	542.771
AAEL002851-RA	536.603	2376	3	3	536.603
AAEL012681-RA	536.603	792	1	1	536.603
AAEL013550-RA	535.926	1586	2	2	535.926
AAEL011414-RC	534.914	1589	0	2	534.914
AAEL004284-RA	532.568	798	1	1	532.568
AAEL015061-RA	527.937	805	1	1	527.937
AAEL004500-RA	524.031	4055	0	5	524.031
AAEL007785-RA	522.742	1626	2	2	522.742
AAEL013086-RA	520.82	3264	4	4	520.82
AAEL000792-RA	517.019	822	1	1	517.019
AAEL005901-RA	516.39	823	0	1	516.39
AAEL002839-RA	514.204	1653	2	2	514.204
AAEL000902-RA	512.344	1659	2	2	512.344
AAEL003505-RA	508.969	2505	3	3	508.969
AAEL003381-RA	507.753	837	1	1	507.753
AAEL002673-RA	505.94	1680	2	2	505.94
AAEL000269-RA	505.338	841	1	1	505.338
AAEL017334-RA	502.946	2535	3	3	502.946
AAEL009504-RA	500.576	849	1	1	500.576
AAEL004651-RA	499.4	2553	3	3	499.4
AAEL001595-RA	498.229	853	1	1	498.229
AAEL001795-RA	498.229	853	1	1	498.229
AAEL003039-RA	496.483	1712	2	2	496.483
AAEL017483-RA	493.6	1722	2	2	493.6
AAEL008103-RA	492.456	863	0	1	492.456
AAEL006389-RA	491.886	1728	2	2	491.886
AAEL007289-RA	488.494	870	1	1	488.494
AAEL009198-RA	478.861	1775	2	2	478.861
AAEL013410-RA	476.445	892	1	1	476.445
AAEL013320-RA	473.79	897	1	1	473.79
AAEL011471-RD	472.736	899	0	1	472.736
AAEL008674-RA	472.473	1799	0	2	472.473
AAEL017315-RA	471.425	3606	4	4	471.425
AAEL002832-RA	471.163	902	1	1	471.163
AAEL011683-RA	468.566	907	0	1	468.566
AAEL003053-RD	467.535	909	0	1	467.535
AAEL008103-RB	465.997	912	0	1	465.997
AAEL006415-RA	465.105	3655	4	4	465.105
AAEL003582-RA	464.977	914	1	1	464.977
AAEL001375-RA	464.469	915	1	1	464.469
AAEL017012-RA	463.709	1833	0	2	463.709
AAEL010555-RA	462.783	2755	3	3	462.783
AAEL003180-RA	461.945	920	1	1	461.945
AAEL000839-RA	461.193	1843	2	2	461.193
AAEL000331-RA	459.945	924	1	1	459.945
AAEL004976-RA	459.448	925	1	1	459.448
AAEL017098-RA	457.963	3712	4	4	457.963
AAEL011195-RA	457.47	929	1	1	457.47
AAEL004738-RA	456.242	1863	2	2	456.242
AAEL008188-RA	455.021	934	1	1	455.021
AAEL013279-RA	454.534	935	1	1	454.534
AAEL003355-RA	446.183	1905	2	2	446.183
AAEL017222-RA	445.482	954	1	1	445.482
AAEL017253-RG	443.621	958	0	1	443.621
AAEL004482-RA	442.697	960	1	1	442.697
AAEL005754-RA	439.606	3867	4	4	439.606
AAEL010051-RA	437.232	1944	2	2	437.232
AAEL007650-RA	435.887	1950	2	2	435.887
AAEL008580-RA	434.106	979	1	1	434.106
AAEL011471-RC	433.663	980	0	1	433.663
AAEL016972-RA	432.339	983	1	1	432.339
AAEL017349-RA	431.9	1968	2	2	431.9
AAEL002381-RA	431.9	984	1	1	431.9
AAEL002551-RA	430.042	3953	4	4	430.042
AAEL012417-RA	429.282	990	1	1	429.282
AAEL010787-RC	426.91	1991	0	2	426.91
AAEL008328-RA	424.141	1002	1	1	424.141
AAEL003469-RA	423.296	1004	0	1	423.296
AAEL008194-RA	422.035	1007	0	1	422.035
AAEL009102-RA	421.616	4032	4	4	421.616
AAEL004523-RA	421.199	2018	2	2	421.199
AAEL007383-RD	418.297	1016	0	1	418.297
AAEL012915-RA	417.885	1017	1	1	417.885
AAEL017275-RA	417.885	1017	1	1	417.885
AAEL008906-RA	415.434	2046	2	2	415.434
AAEL007928-RA	415.299	3070	2	3	415.299
AAEL005515-RD	414.422	2051	0	2	414.422
AAEL007408-RA	414.22	1026	0	1	414.22
AAEL009299-RA	411.811	2064	2	2	411.811
AAEL004846-RA	411.811	1032	0	1	411.811
AAEL007542-RA	411.214	2067	2	2	411.214
AAEL013625-RD	410.618	1035	0	1	410.618
AAEL013168-RA	409.431	1038	1	1	409.431
AAEL007671-RA	408.644	2080	2	2	408.644
AAEL009061-RA	402.834	3165	3	3	402.834
AAEL011090-RA	402.071	1057	1	1	402.071
AAEL006149-RA	401.691	2116	2	2	401.691
AAEL008485-RA	400.555	1061	1	1	400.555
AAEL002761-RE	398.677	1066	0	1	398.677
AAEL003743-RA	398.303	3201	3	3	398.303
AAEL017298-RA	397.558	1069	1	1	397.558
AAEL012271-RA	396.815	1071	1	1	396.815
AAEL008850-RA	393.873	1079	1	1	393.873
AAEL004457-RB	392.419	1083	0	1	392.419
AAEL006070-RA	392.057	1084	1	1	392.057
AAEL000028-RA	390.257	1089	1	1	390.257
AAEL010312-RA	389.899	3270	3	3	389.899
AAEL005740-RA	389.363	2183	2	2	389.363
AAEL017412-RA	388.295	2189	2	2	388.295
AAEL006480-RA	386.003	1101	1	1	386.003
AAEL002789-RA	385.653	1102	1	1	385.653
AAEL007489-RA	384.78	2209	2	2	384.78
AAEL014250-RA	383.911	1107	1	1	383.911
AAEL005064-RA	381.841	1113	1	1	381.841
AAEL002495-RA	381.499	1114	1	1	381.499
AAEL013537-RA	380.134	1118	0	1	380.134
AAEL001432-RA	379.455	2240	2	2	379.455
AAEL006498-RA	378.778	1122	1	1	378.778
AAEL007383-RB	378.441	1123	0	1	378.441
AAEL001099-RA	377.433	3378	3	3	377.433
AAEL009955-RA	376.504	10159	9	9	376.504
AAEL008803-RA	376.43	1129	0	1	376.43
AAEL006332-RA	375.764	1131	1	1	375.764
AAEL009074-RA	373.781	1137	1	1	373.781
AAEL009101-RA	372.798	1140	1	1	372.798
AAEL011254-RA	371.819	1143	1	1	371.819
AAEL003993-RA	370.523	1147	1	1	370.523
AAEL006485-RB	370.2	1148	0	1	370.2
AAEL013510-RA	369.958	4595	3	4	369.958
AAEL007893-RA	367.956	1155	1	1	367.956
AAEL004453-RA	365.425	2326	2	2	365.425
AAEL009861-RC	365.425	1163	0	1	365.425
AAEL013305-RA	364.485	1166	1	1	364.485
AAEL017516-RC	363.861	1168	0	1	363.861
AAEL011738-RA	363.55	1169	1	1	363.55
AAEL011564-RA	363.239	1170	0	1	363.239
AAEL004871-RA	362.619	1172	1	1	362.619
AAEL014818-RA	361.386	1176	0	1	361.386
AAEL010850-RA	360.772	1178	0	1	360.772
AAEL008883-RA	360.466	1179	1	1	360.466
AAEL017022-RA	358.944	1184	1	1	358.944
AAEL005515-RB	358.037	1187	0	1	358.037
AAEL006485-RC	355.64	1195	0	1	355.64
AAEL005165-RB	353.863	1201	0	1	353.863
AAEL006486-RA	353.275	1203	1	1	353.275
AAEL004129-RB	352.542	2411	0	2	352.542
AAEL012733-RA	350.651	1212	1	1	350.651
AAEL003046-RA	350.362	3639	3	3	350.362
AAEL002900-RA	350.074	1214	1	1	350.074
AAEL000562-RA	349.785	1215	1	1	349.785
AAEL011101-RA	349.211	1217	1	1	349.211
AAEL001664-RA	349.211	1217	1	1	349.211
AAEL005402-RA	348.495	2439	2	2	348.495
AAEL013093-RA	348.352	1220	0	1	348.352
AAEL007609-RA	347.782	1222	0	1	347.782
AAEL005736-RB	346.506	2453	0	2	346.506
AAEL010465-RA	346.083	1228	1	1	346.083
AAEL009879-RB	344.679	1233	0	1	344.679
AAEL003750-RA	342.457	1241	0	1	342.457
AAEL001113-RA	341.906	2486	2	2	341.906
AAEL007385-RB	341.631	1244	0	1	341.631
AAEL009042-RA	341.357	1245	1	1	341.357
AAEL017516-RA	341.083	1246	0	1	341.083
AAEL014008-RA	339.72	1251	0	1	339.72
AAEL012466-RA	338.907	2508	2	2	338.907
AAEL012107-RA	336.226	1264	1	1	336.226
AAEL008519-RA	335.695	2532	2	2	335.695
AAEL003406-RA	335.695	1266	1	1	335.695
AAEL001030-RA	335.695	1266	1	1	335.695
AAEL005597-RA	334.506	2541	2	2	334.506
AAEL013066-RA	333.587	1274	1	1	333.587
AAEL008848-RA	333.325	1275	1	1	333.325
AAEL001922-RA	333.064	1276	1	1	333.064
AAEL017118-RA	332.543	1278	1	1	332.543
AAEL005473-RA	330.217	1287	1	1	330.217
AAEL002601-RA	330.217	1287	1	1	330.217
AAEL007945-RA	329.961	1288	1	1	329.961
AAEL002276-RA	329.705	1289	1	1	329.705
AAEL006624-RA	327.924	1296	1	1	327.924
AAEL003704-RA	327.419	1298	1	1	327.419
AAEL013739-RA	326.664	1301	1	1	326.664
AAEL000934-RD	326.162	1303	0	1	326.162
AAEL009637-RA	324.915	1308	1	1	324.915
AAEL002162-RA	324.915	1308	1	1	324.915
AAEL008098-RA	323.432	2628	2	2	323.432
AAEL007162-RA	323.432	1314	1	1	323.432
AAEL007078-RA	322.532	3953	3	3	322.532
AAEL008500-RA	321.962	1320	1	1	321.962
AAEL014682-RA	321.962	1320	1	1	321.962
AAEL003123-RA	321.718	1321	1	1	321.718
AAEL002636-RA	320.989	1324	1	1	320.989
AAEL008007-RA	320.505	1326	1	1	320.505
AAEL007829-RA	320.263	1327	1	1	320.263
AAEL009770-RB	320.263	1327	0	1	320.263
AAEL003957-RA	319.541	1330	0	1	319.541
AAEL008615-RA	319.421	2661	2	2	319.421
AAEL012685-RA	319.061	1332	1	1	319.061
AAEL010318-RB	318.662	4001	0	3	318.662
AAEL007866-RA	318.583	1334	1	1	318.583
AAEL003750-RB	317.868	1337	0	1	317.868
AAEL000934-RB	317.156	1340	0	1	317.156
AAEL010318-RA	315.977	4035	1	3	315.977
AAEL004290-RA	313.761	2709	2	2	313.761
AAEL011871-RA	313.414	1356	1	1	313.414
AAEL005008-RC	312.952	1358	0	1	312.952
AAEL008663-RA	312.722	1359	1	1	312.722
AAEL010228-RA	311.576	1364	1	1	311.576
AAEL014051-RA	311.234	2731	2	2	311.234
AAEL014053-RA	309.872	2743	2	2	309.872
AAEL001551-RA	309.308	1374	0	1	309.308
AAEL012227-RA	309.083	1375	1	1	309.083
AAEL001917-RA	308.41	1378	1	1	308.41
AAEL014149-RA	307.295	1383	1	1	307.295
AAEL003027-RA	306.852	1385	1	1	306.852
AAEL003349-RA	306.52	2773	2	2	306.52
AAEL003776-RA	306.409	1387	1	1	306.409
AAEL001402-RA	306.188	1388	1	1	306.188
AAEL006607-RA	305.308	1392	1	1	305.308
AAEL014721-RA	305.089	1393	0	1	305.089
AAEL012865-RA	304.87	1394	1	1	304.87
AAEL010748-RA	303.347	1401	1	1	303.347
AAEL005041-RA	302.484	1405	1	1	302.484
AAEL000084-RA	302.268	1406	1	1	302.268
AAEL001779-RA	300.346	1415	1	1	300.346
AAEL013676-RA	299.288	1420	1	1	299.288
AAEL004180-RA	299.078	1421	1	1	299.078
AAEL011282-RA	297.612	2856	2	2	297.612
AAEL014698-RB	297.612	1428	0	1	297.612
AAEL011146-RA	296.988	1431	1	1	296.988
AAEL002081-RB	296.78	1432	0	1	296.78
AAEL009224-RA	296.573	1433	0	1	296.573
AAEL007875-RB	296.573	1433	0	1	296.573
AAEL008497-RA	295.748	1437	1	1	295.748
AAEL007747-RA	295.748	1437	1	1	295.748
AAEL009331-RA	295.542	1438	1	1	295.542
AAEL003494-RA	295.337	1439	1	1	295.337
AAEL017385-RA	294.62	2885	1	2	294.62
AAEL013685-RA	294.314	1444	1	1	294.314
AAEL002299-RA	293.096	1450	1	1	293.096
AAEL004059-RB	293.096	1450	0	1	293.096
AAEL008833-RA	292.089	1455	1	1	292.089
AAEL012235-RA	291.888	1456	1	1	291.888
AAEL000682-RA	291.438	5833	4	4	291.438
AAEL001352-RA	290.69	2924	2	2	290.69
AAEL017026-RA	289.7	1467	1	1	289.7
AAEL004452-RA	289.108	1470	1	1	289.108
AAEL003119-RA	289.108	1470	0	1	289.108
AAEL004829-RA	288.716	1472	1	1	288.716
AAEL013359-RB	287.738	2954	0	2	287.738
AAEL004884-RA	286.767	1482	1	1	286.767
AAEL001698-RA	286.767	1482	1	1	286.767
AAEL000888-RA	285.228	1490	0	1	285.228
AAEL010787-RA	284.369	2989	0	2	284.369
AAEL008744-RA	283.705	1498	1	1	283.705
AAEL010787-RD	282.949	3004	0	2	282.949
AAEL006248-RA	282.573	1504	1	1	282.573
AAEL012735-RA	281.078	1512	0	1	281.078
AAEL017082-RA	279.048	1523	1	1	279.048
AAEL011526-RA	278.317	1527	1	1	278.317
AAEL003370-RA	278.317	1527	0	1	278.317
AAEL017280-RA	276.686	6144	4	4	276.686
AAEL013535-RA	276.686	1536	1	1	276.686
AAEL005867-RA	275.609	1542	1	1	275.609
AAEL003004-RA	275.431	1543	1	1	275.431
AAEL002083-RA	274.718	3094	2	2	274.718
AAEL003957-RB	274.718	1547	0	1	274.718
AAEL009994-RA	274.364	1549	1	1	274.364
AAEL012932-RB	274.01	1551	1	1	274.01
AAEL002417-RB	274.01	1551	0	1	274.01
AAEL001414-RA	273.481	1554	0	1	273.481
AAEL000956-RA	272.604	1559	0	1	272.604
AAEL002833-RA	272.255	1561	1	1	272.255
AAEL007656-RA	272.255	1561	1	1	272.255
AAEL006474-RA	271.385	3132	2	2	271.385
AAEL003664-RB	271.385	1566	1	1	271.385
AAEL000564-RA	270.982	4705	0	3	270.982
AAEL011698-RA	270.866	1569	1	1	270.866
AAEL008166-RA	270.694	1570	1	1	270.694
AAEL003671-RA	270.608	6282	4	4	270.608
AAEL014718-RA	268.301	1584	1	1	268.301
AAEL012250-RA	267.963	1586	1	1	267.963
AAEL007506-RA	267.891	11105	7	7	267.891
AAEL006256-RA	267.457	1589	1	1	267.457
AAEL010145-RA	266.786	1593	0	1	266.786
AAEL004995-RA	265.951	1598	1	1	265.951
AAEL002160-RA	265.121	1603	1	1	265.121
AAEL005460-RA	263.314	1614	1	1	263.314
AAEL001641-RA	262.826	1617	1	1	262.826
AAEL013484-RA	262.663	1618	1	1	262.663
AAEL013159-RA	262.339	1620	1	1	262.339
AAEL007878-RA	262.016	1622	1	1	262.016
AAEL000574-RB	261.854	1623	0	1	261.854
AAEL003508-RB	261.05	1628	0	1	261.05
AAEL011414-RA	260.73	1630	0	1	260.73
AAEL010562-RA	260.41	1632	1	1	260.41
AAEL004007-RA	259.456	1638	1	1	259.456
AAEL004264-RA	258.824	1642	1	1	258.824
AAEL004468-RA	258.509	1644	1	1	258.509
AAEL010565-RB	257.882	3296	0	2	257.882
AAEL009326-RA	257.726	3298	2	2	257.726
AAEL017419-RA	255.71	1662	1	1	255.71
AAEL010576-RP	254.943	1667	0	1	254.943
AAEL010946-RA	254.79	1668	1	1	254.79
AAEL002169-RA	254.332	1671	1	1	254.332
AAEL003657-RA	254.18	1672	1	1	254.18
AAEL002487-RA	253.725	1675	1	1	253.725
AAEL016973-RA	252.07	1686	1	1	252.07
AAEL007284-RA	251.92	1687	1	1	251.92
AAEL007853-RA	251.92	1687	1	1	251.92
AAEL011137-RA	251.771	1688	1	1	251.771
AAEL008714-RA	251.399	3381	2	2	251.399
AAEL011191-RA	251.324	1691	1	1	251.324
AAEL012401-RA	251.176	1692	1	1	251.176
AAEL009077-RA	250.583	1696	1	1	250.583
AAEL004501-RA	250.362	3395	2	2	250.362
AAEL012431-RA	249.847	1701	1	1	249.847
AAEL004054-RA	249.847	1701	1	1	249.847
AAEL013139-RE	249.847	1701	0	1	249.847
AAEL013460-RA	249.553	3406	2	2	249.553
AAEL009654-RB	248.969	1707	0	1	248.969
AAEL001752-RB	248.459	3421	2	2	248.459
AAEL013382-RA	248.097	3426	2	2	248.097
AAEL000950-RA	247.807	1715	1	1	247.807
AAEL008947-RA	245.801	1729	1	1	245.801
AAEL014768-RA	244.669	6948	4	4	244.669
AAEL010576-RI	244.669	1737	0	1	244.669
AAEL007417-RA	244.294	5219	3	3	244.294
AAEL002861-RA	244.106	1741	0	1	244.106
AAEL011288-RA	243.547	1745	1	1	243.547
AAEL002700-RA	243.268	1747	0	1	243.268
AAEL012956-RA	242.99	1749	1	1	242.99
AAEL000546-RA	242.99	1749	1	1	242.99
AAEL007446-RA	242.021	1756	1	1	242.021
AAEL017075-RB	241.884	1757	0	1	241.884
AAEL003117-RA	241.471	1760	1	1	241.471
AAEL008890-RA	240.515	1767	1	1	240.515
AAEL017462-RB	238.49	1782	1	1	238.49
AAEL007103-RA	237.69	1788	1	1	237.69
AAEL002148-RA	237.424	1790	0	1	237.424
AAEL003835-RB	236.631	1796	0	1	236.631
AAEL007290-RA	236.105	3600	2	2	236.105
AAEL009396-RA	236.105	1800	1	1	236.105
AAEL003188-RA	236.105	1800	1	1	236.105
AAEL000197-RA	235.909	3603	2	2	235.909
AAEL014057-RA	235.386	3611	2	2	235.386
AAEL014098-RA	234.801	1810	1	1	234.801
AAEL011220-RA	234.154	1815	1	1	234.154
AAEL004117-RA	233.318	3643	2	2	233.318
AAEL012687-RA	233.254	1822	1	1	233.254
AAEL004418-RA	232.999	1824	1	1	232.999
AAEL015082-RA	232.871	1825	1	1	232.871
AAEL003835-RA	232.871	1825	0	1	232.871
AAEL010205-RE	232.871	1825	0	1	232.871
AAEL003228-RA	232.616	1827	1	1	232.616
AAEL003141-RA	232.489	1828	1	1	232.489
AAEL011918-RA	232.362	1829	1	1	232.362
AAEL009422-RE	232.108	1831	0	1	232.108
AAEL002986-RA	231.812	5500	3	3	231.812
AAEL005358-RA	231.476	1836	0	1	231.476
AAEL004278-RA	231.35	1837	1	1	231.35
AAEL000440-RA	230.972	3680	2	2	230.972
AAEL013017-RA	230.471	1844	1	1	230.471
AAEL008073-RA	229.848	1849	1	1	229.848
AAEL004551-RA	229.724	3700	2	2	229.724
AAEL009988-RA	229.043	3711	2	2	229.043
AAEL008881-RA	228.489	3720	2	2	228.489
AAEL006879-RB	227.51	1868	0	1	227.51
AAEL004838-RA	227.389	3738	1	2	227.389
AAEL012062-RC	226.842	3747	0	2	226.842
AAEL011240-RC	226.299	3756	2	2	226.299
AAEL004886-RA	225.459	3770	2	2	225.459
AAEL008657-RA	225.459	1885	0	1	225.459
AAEL004125-RA	225.22	1887	1	1	225.22
AAEL012618-RA	224.269	1895	0	1	224.269
AAEL005850-RA	224.151	3792	2	2	224.151
AAEL012243-RA	223.855	3797	1	2	223.855
AAEL011750-RA	223.092	1905	1	1	223.092
AAEL000260-RA	223.092	1905	1	1	223.092
AAEL003594-RA	221.927	1915	1	1	221.927
AAEL007555-RA	221.927	1915	1	1	221.927
AAEL013969-RA	221.927	1915	1	1	221.927
AAEL002351-RA	221.349	1920	1	1	221.349
AAEL002744-RA	220.659	1926	1	1	220.659
AAEL017421-RA	220.545	1927	1	1	220.545
AAEL011955-RA	219.293	1938	1	1	219.293
AAEL009422-RC	219.293	1938	0	1	219.293
AAEL001188-RA	218.504	1945	1	1	218.504
AAEL006301-RA	218.504	1945	1	1	218.504
AAEL006143-RA	218.279	1947	1	1	218.279
AAEL006830-RA	218.279	1947	1	1	218.279
AAEL007358-RA	217.943	1950	1	1	217.943
AAEL002698-RA	217.832	3902	2	2	217.832
AAEL013596-RA	217.72	1952	1	1	217.72
AAEL002767-RA	217.608	1953	1	1	217.608
AAEL006244-RA	217.053	1958	1	1	217.053
AAEL006659-RA	216.61	1962	1	1	216.61
AAEL000944-RA	216.28	1965	1	1	216.28
AAEL013204-RA	216.17	1966	1	1	216.17
AAEL014296-RA	216.17	1966	1	1	216.17
AAEL001910-RA	216.005	3935	2	2	216.005
AAEL007471-RA	215.95	1968	1	1	215.95
AAEL017054-RA	215.913	5905	3	3	215.913
AAEL011023-RA	215.785	3939	2	2	215.785
AAEL003527-RA	215.184	1975	1	1	215.184
AAEL007883-RA	215.076	1976	1	1	215.076
AAEL005847-RA	214.967	3954	2	2	214.967
AAEL009382-RA	214.967	1977	1	1	214.967
AAEL000429-RA	213.241	1993	1	1	213.241
AAEL017058-RA	211.859	2006	1	1	211.859
AAEL008849-RA	211.754	2007	1	1	211.754
AAEL002646-RA	211.438	2010	1	1	211.438
AAEL002388-RA	211.438	2010	1	1	211.438
AAEL006741-RA	211.227	2012	1	1	211.227
AAEL010584-RA	210.287	2021	1	1	210.287
AAEL002827-RA	210.079	2023	1	1	210.079
AAEL007778-RA	210.079	2023	1	1	210.079
AAEL012246-RA	209.871	2025	1	1	209.871
AAEL010060-RA	209.664	2027	1	1	209.664
AAEL002886-RB	208.635	2037	0	1	208.635
AAEL004685-RA	208.533	2038	1	1	208.533
AAEL004699-RA	207.11	4104	2	2	207.11
AAEL001869-RA	206.807	2055	1	1	206.807
AAEL009572-RA	206.406	2059	1	1	206.406
AAEL000079-RA	206.13	8247	4	4	206.13
AAEL000140-RA	205.806	2065	1	1	205.806
AAEL010781-RA	205.806	2065	1	1	205.806
AAEL009646-RA	205.756	4131	2	2	205.756
AAEL006776-RA	205.607	2067	1	1	205.607
AAEL006928-RA	205.111	2072	1	1	205.111
AAEL014529-RA	204.814	2075	1	1	204.814
AAEL007565-RA	204.175	4163	2	2	204.175
AAEL005558-RA	202.956	2094	1	1	202.956
AAEL013353-RA	202.956	2094	0	1	202.956
AAEL012821-RA	201.512	2109	0	1	201.512
AAEL002080-RA	201.131	2113	1	1	201.131
AAEL009871-RA	200.609	4237	2	2	200.609
AAEL012980-RA	200.467	2120	1	1	200.467
AAEL013136-RA	199.682	6385	3	3	199.682
AAEL009971-RA	198.965	2136	1	1	198.965
AAEL014959-RA	198.686	2139	1	1	198.686
AAEL001526-RA	198.686	2139	1	1	198.686
AAEL002144-RA	197.854	4296	2	2	197.854
AAEL001005-RA	197.761	2149	1	1	197.761
AAEL004699-RB	197.394	2153	0	1	197.394
AAEL007799-RB	197.394	2153	0	1	197.394
AAEL008963-RA	196.754	2160	1	1	196.754
AAEL001088-RA	196.754	2160	1	1	196.754
AAEL001580-RA	196.3	2165	1	1	196.3
AAEL017147-RB	196.209	2166	0	1	196.209
AAEL005031-RA	194.86	2181	1	1	194.86
AAEL005515-RF	194.414	2186	0	1	194.414
AAEL000278-RA	194.059	2190	1	1	194.059
AAEL003973-RA	192.564	2207	0	1	192.564
AAEL003345-RA	192.477	2208	1	1	192.477
AAEL000574-RA	192.39	2209	0	1	192.39
AAEL008389-RA	191.566	4437	2	2	191.566
AAEL003973-RB	191.006	2225	0	1	191.006
AAEL003100-RA	190.322	2233	1	1	190.322
AAEL001275-RA	190.152	2235	1	1	190.152
AAEL002455-RA	189.756	6719	3	3	189.756
AAEL010184-RA	189.333	6734	3	3	189.333
AAEL011636-RA	189.221	2246	1	1	189.221
AAEL006125-RA	189.221	2246	1	1	189.221
AAEL002420-RA	189.136	2247	1	1	189.136
AAEL009902-RA	188.968	2249	1	1	188.968
AAEL001289-RA	188.716	2252	1	1	188.716
AAEL007686-RA	188.633	2253	1	1	188.633
AAEL008661-RA	188.382	2256	1	1	188.382
AAEL003949-RA	187.385	2268	1	1	187.385
AAEL002660-RA	186.399	2280	1	1	186.399
AAEL010000-RA	186.317	2281	1	1	186.317
AAEL005593-RA	186.154	2283	1	1	186.154
AAEL012039-RA	185.91	4572	2	2	185.91
AAEL005527-RA	185.181	2295	1	1	185.181
AAEL006667-RA	185.181	2295	0	1	185.181
AAEL000784-RA	184.939	2298	1	1	184.939
AAEL009815-RA	184.778	2300	1	1	184.778
AAEL010359-RA	184.217	2307	1	1	184.217
AAEL017008-RA	183.978	2310	1	1	183.978
AAEL001667-RA	183.819	2312	1	1	183.819
AAEL010787-RB	183.739	2313	0	1	183.739
AAEL010979-RA	183.501	2316	1	1	183.501
AAEL010226-RB	183.027	2322	0	1	183.027
AAEL003877-RA	182.791	2325	1	1	182.791
AAEL012394-RA	182.634	2327	1	1	182.634
AAEL003514-RA	182.399	2330	1	1	182.399
AAEL005892-RA	182.321	2331	1	1	182.321
AAEL012576-RA	181.93	2336	0	1	181.93
AAEL010159-RA	181.658	4679	2	2	181.658
AAEL015099-RB	181.309	2344	0	1	181.309
AAEL010059-RA	181.155	2346	1	1	181.155
AAEL006879-RA	180.847	2350	0	1	180.847
AAEL001454-RA	180.463	2355	1	1	180.463
AAEL001206-RA	180.233	2358	1	1	180.233
AAEL000596-RA	180.08	4720	2	2	180.08
AAEL017447-RC	179.776	2364	0	1	179.776
AAEL001094-RB	179.169	2372	0	1	179.169
AAEL001147-RA	178.043	7161	3	3	178.043
AAEL002798-RA	177.671	2392	1	1	177.671
AAEL013359-RC	176.711	2405	0	1	176.711
AAEL003746-RA	176.564	2407	1	1	176.564
AAEL005645-RA	176.417	2409	1	1	176.417
AAEL003404-RA	176.417	2409	0	1	176.417
AAEL010135-RA	176.198	2412	1	1	176.198
AAEL005211-RA	175.652	4839	2	2	175.652
AAEL017207-RA	175.615	4840	2	2	175.615
AAEL012026-RB	175.181	2426	0	1	175.181
AAEL009088-RA	174.893	2430	1	1	174.893
AAEL005922-RA	174.605	2434	0	1	174.605
AAEL005733-RA	174.438	7309	0	3	174.438
AAEL002569-RA	173.82	2445	1	1	173.82
AAEL005975-RB	173.82	2445	0	1	173.82
AAEL004040-RA	173.253	2453	1	1	173.253
AAEL001525-RA	173.182	2454	1	1	173.182
AAEL014352-RA	172.9	2458	1	1	172.9
AAEL004697-RA	172.409	2465	1	1	172.409
AAEL001659-RA	172.34	2466	1	1	172.34
AAEL005410-RA	172.2	2468	1	1	172.2
AAEL007637-RA	171.505	2478	1	1	171.505
AAEL004129-RA	171.367	2480	0	1	171.367
AAEL004345-RA	171.229	2482	1	1	171.229
AAEL005728-RA	170.678	2490	1	1	170.678
AAEL012262-RC	170.678	2490	0	1	170.678
AAEL017075-RC	170.61	2491	1	1	170.61
AAEL009883-RA	170.405	2494	1	1	170.405
AAEL002764-RA	170.405	2494	0	1	170.405
AAEL002370-RB	169.184	2512	0	1	169.184
AAEL005712-RA	168.424	7570	3	3	168.424
AAEL009285-RA	167.914	2531	1	1	167.914
AAEL006911-RA	167.253	2541	1	1	167.253
AAEL000564-RB	166.826	5095	0	2	166.826
AAEL011594-RA	166.663	2550	1	1	166.663
AAEL008738-RA	166.185	7672	3	3	166.185
AAEL008845-RA	166.174	5115	2	2	166.174
AAEL006783-RA	165.882	5124	2	2	165.882
AAEL008642-RA	165.731	7693	3	3	165.731
AAEL000550-RA	165.494	2568	1	1	165.494
AAEL003519-RA	165.494	2568	1	1	165.494
AAEL008333-RA	165.301	2571	1	1	165.301
AAEL009364-RA	165.044	2575	1	1	165.044
AAEL012996-RA	164.215	2588	1	1	164.215
AAEL001681-RA	163.206	2604	0	1	163.206
AAEL004930-RA	162.894	2609	1	1	162.894
AAEL008814-RA	162.52	5230	2	2	162.52
AAEL015386-RA	162.396	2617	1	1	162.396
AAEL000883-RB	162.334	2618	0	1	162.334
AAEL010600-RA	161.839	2626	1	1	161.839
AAEL010340-RA	161.716	2628	1	1	161.716
AAEL013884-RA	161.654	2629	1	1	161.654
AAEL000604-RA	161.593	2630	1	1	161.593
AAEL012727-RA	161.531	2631	1	1	161.531
AAEL007452-RA	161.531	2631	1	1	161.531
AAEL005515-RC	161.531	2631	0	1	161.531
AAEL002556-RA	160.313	2651	1	1	160.313
AAEL002761-RB	159.891	2658	0	1	159.891
AAEL000126-RA	159.77	2660	1	1	159.77
AAEL003651-RA	159.71	2661	1	1	159.71
AAEL003466-RB	159.411	2666	0	1	159.411
AAEL001471-RA	158.934	2674	1	1	158.934
AAEL011732-RA	158.934	2674	1	1	158.934
AAEL000858-RA	158.519	2681	1	1	158.519
AAEL007029-RB	157.989	2690	0	1	157.989
AAEL002550-RC	157.287	2702	0	1	157.287
AAEL009295-RA	156.592	2714	1	1	156.592
AAEL003579-RA	156.246	2720	0	1	156.246
AAEL001007-RA	155.446	2734	1	1	155.446
AAEL000572-RA	155.276	2737	1	1	155.276
AAEL011376-RA	155.162	2739	1	1	155.162
AAEL000452-RA	155.106	2740	1	1	155.106
AAEL007407-RA	154.093	2758	0	1	154.093
AAEL005827-RA	153.537	2768	1	1	153.537
AAEL017546-RA	153.067	5553	2	2	153.067
AAEL004862-RA	152.709	2783	1	1	152.709
AAEL002280-RA	151.674	2802	1	1	151.674
AAEL002600-RA	151.511	2805	1	1	151.511
AAEL015099-RG	151.403	2807	0	1	151.403
AAEL011742-RA	151.188	2811	1	1	151.188
AAEL000672-RA	150.492	2824	1	1	150.492
AAEL012158-RA	150.226	2829	1	1	150.226
AAEL008266-RA	150.226	2829	1	1	150.226
AAEL007881-RA	150.067	2832	1	1	150.067
AAEL006022-RA	149.513	5685	2	2	149.513
AAEL006956-RA	149.355	5691	2	2	149.355
AAEL008823-RA	149.276	2847	1	1	149.276
AAEL007288-RA	149.119	2850	0	1	149.119
AAEL006834-RA	148.702	2858	1	1	148.702
AAEL007288-RB	148.287	2866	0	1	148.287
AAEL009084-RA	147.208	2887	1	1	147.208
AAEL017566-RA	146.7	2897	1	1	146.7
AAEL011271-RA	146.498	2901	1	1	146.498
AAEL001887-RB	145.994	2911	0	1	145.994
AAEL011258-RA	145.37	5847	2	2	145.37
AAEL003359-RA	144.85	2934	0	1	144.85
AAEL013137-RA	144.653	2938	1	1	144.653
AAEL005801-RA	144.407	5886	2	2	144.407
AAEL007538-RA	144.26	2946	1	1	144.26
AAEL013398-RA	143.967	2952	1	1	143.967
AAEL006082-RA	142.734	5955	2	2	142.734
AAEL009895-RA	142.614	2980	1	1	142.614
AAEL010942-RA	142.566	2981	1	1	142.566
AAEL007624-RA	142.232	2988	1	1	142.232
AAEL012783-RA	141.522	3003	1	1	141.522
AAEL003540-RA	141.522	3003	1	1	141.522
AAEL010387-RA	141.333	3007	1	1	141.333
AAEL011382-RA	141.286	3008	1	1	141.286
AAEL006608-RA	141.239	3009	1	1	141.239
AAEL007767-RA	141.005	3014	1	1	141.005
AAEL005726-RA	140.958	3015	1	1	140.958
AAEL010451-RA	140.958	3015	1	1	140.958
AAEL009937-RA	140.912	3016	0	1	140.912
AAEL012217-RA	140.772	3019	1	1	140.772
AAEL001648-RA	140.678	3021	1	1	140.678
AAEL017240-RA	139.661	3043	0	1	139.661
AAEL012918-RA	139.067	3056	1	1	139.067
AAEL007201-RA	138.885	3060	1	1	138.885
AAEL012568-RA	138.523	3068	1	1	138.523
AAEL000088-RA	138.028	3079	1	1	138.028
AAEL006684-RA	137.76	3085	1	1	137.76
AAEL017391-RA	137.182	9294	3	3	137.182
AAEL012904-RA	137.005	3102	1	1	137.005
AAEL017204-RA	136.961	3103	1	1	136.961
AAEL014168-RA	136.565	3112	0	1	136.565
AAEL003438-RA	136.258	3119	1	1	136.258
AAEL005291-RA	135.823	3129	1	1	135.823
AAEL014248-RA	135.39	3139	1	1	135.39
AAEL007923-RA	135.261	3142	1	1	135.261
AAEL009104-RA	135.175	3144	0	1	135.175
AAEL008688-RA	134.96	3149	1	1	134.96
AAEL013356-RA	134.874	3151	0	1	134.874
AAEL009678-RA	134.81	6305	2	2	134.81
AAEL011065-RA	134.789	3153	1	1	134.789
AAEL002340-RA	133.184	3191	1	1	133.184
AAEL000185-RA	132.561	3206	1	1	132.561
AAEL000262-RA	131.129	3241	1	1	131.129
AAEL008400-RA	130.927	3246	1	1	130.927
AAEL017251-RA	130.565	3255	1	1	130.565
AAEL000217-RA	130.285	3262	1	1	130.285
AAEL000423-RA	129.491	3282	1	1	129.491
AAEL011663-RA	129.333	6572	2	2	129.333
AAEL000567-RA	128.357	3311	1	1	128.357
AAEL012092-RA	128.086	3318	1	1	128.086
AAEL007397-RC	127.97	3321	0	1	127.97
AAEL009354-RA	127.624	3330	1	1	127.624
AAEL011731-RA	127.052	3345	1	1	127.052
AAEL005009-RA	126.976	3347	1	1	126.976
AAEL011577-RA	126.825	3351	1	1	126.825
AAEL003955-RA	125.625	6766	2	2	125.625
AAEL005985-RA	125.292	3392	1	1	125.292
AAEL001636-RA	124.74	3407	1	1	124.74
AAEL017357-RA	124.594	6822	2	2	124.594
AAEL004834-RA	124.539	6825	2	2	124.539
AAEL001719-RA	124.484	3414	1	1	124.484
AAEL006567-RA	123.723	3435	1	1	123.723
AAEL000703-RA	123.436	3443	1	1	123.436
AAEL001612-RA	123.364	6890	2	2	123.364
AAEL008832-RA	123.185	3450	1	1	123.185
AAEL001484-RA	121.669	3493	0	1	121.669
AAEL010585-RA	120.77	3519	1	1	120.77
AAEL000961-RA	119.884	7090	2	2	119.884
AAEL010871-RA	119.648	3552	1	1	119.648
AAEL000758-RA	119.312	3562	0	1	119.312
AAEL017521-RA	119.111	3568	1	1	119.111
AAEL009265-RA	119.095	7137	2	2	119.095
AAEL017263-RA	119.045	3570	1	1	119.045
AAEL006038-RA	118.945	7146	2	2	118.945
AAEL004694-RA	118.845	3576	1	1	118.845
AAEL009666-RB	118.778	7156	0	2	118.778
AAEL005458-RA	118.58	3584	1	1	118.58
AAEL009344-RA	118.151	3597	1	1	118.151
AAEL004017-RA	118.085	3599	1	1	118.085
AAEL005733-RB	118.02	7202	0	2	118.02
AAEL008958-RA	118.02	3601	1	1	118.02
AAEL002581-RA	118.02	3601	1	1	118.02
AAEL011737-RA	117.987	3602	1	1	117.987
AAEL001436-RA	117.563	3615	1	1	117.563
AAEL008564-RA	116.531	3647	1	1	116.531
AAEL004658-RA	116.499	3648	1	1	116.499
AAEL000264-RA	116.499	3648	1	1	116.499
AAEL009959-RA	116.467	7298	2	2	116.467
AAEL003754-RB	115.455	3681	0	1	115.455
AAEL008110-RA	115.361	3684	1	1	115.361
AAEL000798-RA	114.986	3696	1	1	114.986
AAEL010841-RA	114.337	3717	1	1	114.337
AAEL010568-RA	114.244	3720	1	1	114.244
AAEL000857-RA	114.06	3726	1	1	114.06
AAEL009380-RB	113.877	3732	0	1	113.877
AAEL004972-RB	113.603	3741	0	1	113.603
AAEL017153-RA	113.573	3742	1	1	113.573
AAEL004716-RA	113.436	7493	0	2	113.436
AAEL006021-RA	113.27	3752	1	1	113.27
AAEL006205-RA	112.58	3775	0	1	112.58
AAEL006307-RA	111.987	7590	2	2	111.987
AAEL010133-RA	111.575	3809	1	1	111.575
AAEL009691-RA	111.312	3818	1	1	111.312
AAEL007662-RA	110.674	3840	1	1	110.674
AAEL002475-RA	110.617	3842	1	1	110.617
AAEL014730-RA	110.158	3858	1	1	110.158
AAEL001273-RA	110.158	3858	1	1	110.158
AAEL007150-RA	110.101	3860	1	1	110.101
AAEL010655-RA	109.731	3873	1	1	109.731
AAEL011089-RA	109.731	3873	0	1	109.731
AAEL014506-RA	109.182	15570	4	4	109.182
AAEL000293-RA	109.084	3896	1	1	109.084
AAEL006522-RA	108.888	3903	1	1	108.888
AAEL004412-RA	108.554	3915	1	1	108.554
AAEL001411-RA	108.347	7845	1	2	108.347
AAEL004839-RA	108.305	3924	1	1	108.305
AAEL004500-RB	108.222	3927	0	1	108.222
AAEL010991-RA	107.893	3939	1	1	107.893
AAEL004981-RA	107.893	3939	1	1	107.893
AAEL004791-RA	107.756	3944	1	1	107.756
AAEL012613-RA	107.729	3945	1	1	107.729
AAEL000804-RB	107.701	3946	0	1	107.701
AAEL012817-RA	107.619	3949	1	1	107.619
AAEL008709-RA	106.701	3983	1	1	106.701
AAEL006582-RC	106.567	3988	0	1	106.567
AAEL002422-RA	106.115	4005	1	1	106.115
AAEL012290-RA	105.956	4011	0	1	105.956
AAEL002774-RB	105.745	4019	0	1	105.745
AAEL009607-RB	105.274	4037	0	1	105.274
AAEL009152-RA	105.039	4046	1	1	105.039
AAEL003882-RA	104.962	8098	2	2	104.962
AAEL001847-RA	104.91	4051	1	1	104.91
AAEL005425-RA	104.729	4058	1	1	104.729
AAEL017080-RA	104.088	4083	1	1	104.088
AAEL007979-RA	103.986	4087	1	1	103.986
AAEL006187-RA	103.948	8177	2	2	103.948
AAEL011063-RA	103.605	4102	1	1	103.605
AAEL009219-RA	103.078	4123	1	1	103.078
AAEL012607-RA	102.94	8257	2	2	102.94
AAEL005499-RA	102.432	4149	1	1	102.432
AAEL004984-RA	102.284	4155	1	1	102.284
AAEL005026-RA	102.284	4155	1	1	102.284
AAEL009380-RC	102.185	4159	0	1	102.185
AAEL007019-RA	102.112	4162	1	1	102.112
AAEL007227-RA	102.063	4164	1	1	102.063
AAEL005338-RA	101.733	8355	2	2	101.733
AAEL008462-RA	101.648	4181	1	1	101.648
AAEL006073-RA	101.044	4206	1	1	101.044
AAEL013863-RA	100.589	4225	1	1	100.589
AAEL000747-RA	99.7394	4261	1	1	99.7394
AAEL010074-RA	98.9037	4297	1	1	98.9037
AAEL009934-RA	98.7888	4302	1	1	98.7888
AAEL002691-RA	98.6741	4307	0	1	98.6741
AAEL007563-RA	97.497	4359	1	1	97.497
AAEL000581-RA	97.3184	4367	1	1	97.3184
AAEL003875-RA	97.2738	4369	1	1	97.2738
AAEL004039-RA	97.096	4377	1	1	97.096
AAEL003104-RA	96.4789	4405	1	1	96.4789
AAEL005238-RA	96.304	4413	1	1	96.304
AAEL011104-RA	95.8046	4436	1	1	95.8046
AAEL009405-RA	95.5892	4446	1	1	95.5892
AAEL004297-RA	94.8637	4480	1	1	94.8637
AAEL004623-RA	94.2327	4510	1	1	94.2327
AAEL007651-RA	94.0866	4517	1	1	94.0866
AAEL014592-RA	93.7339	4534	1	1	93.7339
AAEL008247-RA	92.7115	4584	1	1	92.7115
AAEL000758-RB	92.0289	4618	0	1	92.0289
AAEL007132-RA	89.7486	14206	3	3	89.7486
AAEL001141-RA	88.9657	4777	1	1	88.9657
AAEL000263-RA	88.2087	4818	1	1	88.2087
AAEL001296-RA	87.4284	4861	1	1	87.4284
AAEL010827-RA	87.088	4880	1	1	87.088
AAEL004327-RA	86.7325	4900	1	1	86.7325
AAEL006448-RA	86.5735	4909	1	1	86.5735
AAEL010633-RA	86.2222	4929	1	1	86.2222
AAEL014711-RA	86.1	4936	1	1	86.1
AAEL009346-RA	85.9606	4944	1	1	85.9606
AAEL012698-RA	85.5626	4967	1	1	85.5626
AAEL005930-RA	85.2622	9969	2	2	85.2622
AAEL000109-RA	84.9639	5002	1	1	84.9639
AAEL007915-RA	84.6761	5019	1	1	84.6761
AAEL009993-RA	84.198	10095	2	2	84.198
AAEL017233-RA	83.874	5067	1	1	83.874
AAEL012536-RA	83.6923	5078	1	1	83.6923
AAEL014034-RA	83.5278	5088	1	1	83.5278
AAEL012251-RA	83.4786	5091	1	1	83.4786
AAEL001322-RA	81.8074	5195	1	1	81.8074
AAEL013275-RA	81.5875	5209	0	1	81.5875
AAEL006680-RA	79.5413	5343	1	1	79.5413
AAEL000181-RA	77.8511	5459	1	1	77.8511
AAEL002532-RA	77.5811	5478	1	1	77.5811
AAEL006973-RA	77.4115	5490	1	1	77.4115
AAEL007252-RA	77.2146	5504	1	1	77.2146
AAEL000794-RA	77.0467	5516	1	1	77.0467
AAEL013334-RA	76.1357	5582	1	1	76.1357
AAEL011640-RA	76.0948	5585	1	1	76.0948
AAEL004865-RA	75.5671	5624	1	1	75.5671
AAEL011879-RA	74.7694	5684	1	1	74.7694
AAEL012057-RA	74.6643	5692	1	1	74.6643
AAEL014222-RA	74.625	5695	1	1	74.625
AAEL007657-RA	74.5595	5700	1	1	74.5595
AAEL003275-RA	74.5203	5703	1	1	74.5203
AAEL009824-RA	72.5362	5859	1	1	72.5362
AAEL001647-RA	69.6932	6098	1	1	69.6932
AAEL005430-RA	69.6133	6105	0	1	69.6133
AAEL009073-RA	68.6242	6193	1	1	68.6242
AAEL003658-RA	68.5356	6201	1	1	68.5356
AAEL004246-RB	68.5025	6204	0	1	68.5025
AAEL009430-RA	68.4436	18628	3	3	68.4436
AAEL008377-RA	68.4363	6210	1	1	68.4363
AAEL005318-RA	68.2385	6228	1	1	68.2385
AAEL009189-RA	67.868	6262	1	1	67.868
AAEL010757-RA	67.123	12663	2	2	67.123
AAEL013079-RA	65.6354	6475	1	1	65.6354
AAEL004969-RA	65.5039	12976	2	2	65.5039
AAEL000386-RA	65.1824	6520	1	1	65.1824
AAEL006242-RA	64.7356	13130	2	2	64.7356
AAEL008829-RA	63.4881	6694	1	1	63.4881
AAEL009930-RA	63.2707	6717	0	1	63.2707
AAEL014706-RA	63.1579	6729	1	1	63.1579
AAEL008905-RA	62.9987	6746	1	1	62.9987
AAEL009648-RA	62.0513	6849	1	1	62.0513
AAEL010978-RA	62.0151	6853	1	1	62.0151
AAEL011505-RA	61.7448	6883	1	1	61.7448
AAEL001411-RB	59.2402	7174	0	1	59.2402
AAEL011565-RA	58.0587	7320	1	1	58.0587
AAEL007888-RA	57.6804	7368	1	1	57.6804
AAEL003078-RA	56.6049	7508	1	1	56.6049
AAEL004375-RA	56.5747	7512	1	1	56.5747
AAEL005861-RA	56.2974	7549	1	1	56.2974
AAEL000693-RA	55.1719	7703	1	1	55.1719
AAEL009172-RA	54.0699	7860	1	1	54.0699
AAEL009884-RA	53.137	7998	1	1	53.137
AAEL006433-RA	52.5847	8082	1	1	52.5847
AAEL008371-RA	51.2715	8289	1	1	51.2715
AAEL014637-RA	50.1108	8481	1	1	50.1108
AAEL002037-RA	49.1033	8655	1	1	49.1033
AAEL007705-RA	44.6699	9514	1	1	44.6699
AAEL005845-RA	44.3668	9579	1	1	44.3668
AAEL005380-RA	43.7277	9719	1	1	43.7277
AAEL003699-RA	43.7232	9720	1	1	43.7232
AAEL001440-RA	43.1111	9858	1	1	43.1111
AAEL008836-RA	42.3887	10026	1	1	42.3887
AAEL000416-RA	42.0241	10113	1	1	42.0241
AAEL012909-RA	40.9194	10386	1	1	40.9194
AAEL005439-RA	39.9839	10629	1	1	39.9839
AAEL011975-RA	39.7818	10683	1	1	39.7818
AAEL002829-RA	38.5845	22029	2	2	38.5845
AAEL007258-RA	37.3453	11380	1	1	37.3453
AAEL008773-RA	36.5457	11629	1	1	36.5457
AAEL000885-RA	36.0374	11793	1	1	36.0374
AAEL009847-RA	31.6283	13437	1	1	31.6283
AAEL009869-RA	31.2999	13578	1	1	31.2999
AAEL013559-RA	29.3826	14464	1	1	29.3826
AAEL002306-RA	29.2813	14514	1	1	29.2813
AAEL005319-RA	28.7155	14800	1	1	28.7155
AAEL007041-RA	27.6902	15348	1	1	27.6902
AAEL008107-RA	26.9937	15744	1	1	26.9937
AAEL005324-RA	25.0023	16998	1	1	25.0023
AAEL007898-RA	24.6385	34498	2	2	24.6385
AAEL003237-RA	0	690	0	0	0
AAEL014602-RA	0	327	0	0	0
AAEL010223-RA	0	1616	0	0	0
AAEL013583-RA	0	645	0	0	0
AAEL011704-RA	0	2605	0	0	0
AAEL009206-RA	0	1647	0	0	0
AAEL005550-RA	0	1485	0	0	0
AAEL012547-RA	0	4606	0	0	0
AAEL014889-RA	0	763	0	0	0
AAEL013940-RA	0	3152	0	0	0
AAEL012786-RA	0	663	0	0	0
AAEL009224-RB	0	1430	0	0	0
AAEL015380-RA	0	999	0	0	0
AAEL009373-RA	0	724	0	0	0
AAEL002384-RA	0	1813	0	0	0
AAEL005954-RA	0	1878	0	0	0
AAEL003769-RA	0	1245	0	0	0
AAEL003769-RB	0	2192	0	0	0
AAEL014635-RA	0	1524	0	0	0
AAEL014342-RA	0	684	0	0	0
AAEL009122-RA	0	1543	0	0	0
AAEL013202-RA	0	486	0	0	0
AAEL010396-RA	0	829	0	0	0
AAEL010396-RB	0	823	0	0	0
AAEL007225-RA	0	13815	0	0	0
AAEL000979-RA	0	1210	0	0	0
AAEL003013-RA	0	3502	0	0	0
AAEL001942-RA	0	1290	0	0	0
AAEL007208-RA	0	1419	0	0	0
AAEL011160-RA	0	1749	0	0	0
AAEL006846-RA	0	1554	0	0	0
AAEL005461-RA	0	2309	0	0	0
AAEL000727-RA	0	711	0	0	0
AAEL002625-RA	0	1082	0	0	0
AAEL015238-RA	0	548	0	0	0
AAEL002676-RA	0	2208	0	0	0
AAEL008945-RA	0	998	0	0	0
AAEL002950-RA	0	1758	0	0	0
AAEL002950-RB	0	1646	0	0	0
AAEL013887-RA	0	2225	0	0	0
AAEL015316-RA	0	564	0	0	0
AAEL011797-RA	0	819	0	0	0
AAEL009288-RA	0	732	0	0	0
AAEL004083-RA	0	2269	0	0	0
AAEL000983-RA	0	648	0	0	0
AAEL000983-RB	0	715	0	0	0
AAEL000983-RC	0	993	0	0	0
AAEL000983-RD	0	740	0	0	0
AAEL000983-RE	0	1121	0	0	0
AAEL008295-RA	0	435	0	0	0
AAEL000940-RA	0	853	0	0	0
AAEL000268-RA	0	1059	0	0	0
AAEL014703-RA	0	1812	0	0	0
AAEL013119-RA	0	1071	0	0	0
AAEL013119-RB	0	971	0	0	0
AAEL013119-RC	0	1054	0	0	0
AAEL006946-RA	0	1932	0	0	0
AAEL005991-RA	0	1736	0	0	0
AAEL003561-RA	0	528	0	0	0
AAEL004673-RA	0	3244	0	0	0
AAEL005735-RA	0	759	0	0	0
AAEL005865-RA	0	1287	0	0	0
AAEL010966-RA	0	1292	0	0	0
AAEL010966-RB	0	1206	0	0	0
AAEL010966-RC	0	1225	0	0	0
AAEL006024-RA	0	1668	0	0	0
AAEL006067-RA	0	836	0	0	0
AAEL006327-RA	0	1033	0	0	0
AAEL002086-RA	0	639	0	0	0
AAEL009704-RA	0	1554	0	0	0
AAEL003793-RA	0	900	0	0	0
AAEL000582-RA	0	1755	0	0	0
AAEL014740-RA	0	1800	0	0	0
AAEL014175-RA	0	303	0	0	0
AAEL010306-RA	0	756	0	0	0
AAEL008796-RA	0	2517	0	0	0
AAEL014825-RA	0	2090	0	0	0
AAEL001899-RA	0	1047	0	0	0
AAEL006936-RA	0	958	0	0	0
AAEL006936-RB	0	924	0	0	0
AAEL007251-RA	0	1402	0	0	0
AAEL010476-RA	0	1391	0	0	0
AAEL006173-RA	0	303	0	0	0
AAEL001237-RA	0	1414	0	0	0
AAEL002914-RA	0	270	0	0	0
AAEL002248-RA	0	1590	0	0	0
AAEL004444-RA	0	1704	0	0	0
AAEL002424-RA	0	1205	0	0	0
AAEL008209-RA	0	261	0	0	0
AAEL008011-RA	0	459	0	0	0
AAEL007265-RA	0	345	0	0	0
AAEL004762-RA	0	735	0	0	0
AAEL002947-RA	0	1671	0	0	0
AAEL002737-RA	0	460	0	0	0
AAEL008045-RA	0	2175	0	0	0
AAEL004880-RA	0	3948	0	0	0
AAEL000605-RA	0	1747	0	0	0
AAEL013870-RA	0	1703	0	0	0
AAEL013186-RA	0	948	0	0	0
AAEL010117-RA	0	849	0	0	0
AAEL009764-RA	0	2061	0	0	0
AAEL009764-RB	0	1995	0	0	0
AAEL002004-RA	0	381	0	0	0
AAEL002806-RA	0	714	0	0	0
AAEL000283-RA	0	408	0	0	0
AAEL015591-RA	0	1092	0	0	0
AAEL001886-RA	0	1623	0	0	0
AAEL006141-RA	0	486	0	0	0
AAEL002783-RA	0	1376	0	0	0
AAEL001187-RA	0	1993	0	0	0
AAEL000764-RA	0	1332	0	0	0
AAEL008983-RA	0	417	0	0	0
AAEL008219-RA	0	1722	0	0	0
AAEL012565-RA	0	831	0	0	0
AAEL010743-RA	0	1542	0	0	0
AAEL010851-RA	0	2499	0	0	0
AAEL006164-RA	0	330	0	0	0
AAEL012228-RA	0	1403	0	0	0
AAEL004105-RA	0	504	0	0	0
AAEL015283-RA	0	1692	0	0	0
AAEL005883-RA	0	591	0	0	0
AAEL004932-RA	0	2622	0	0	0
AAEL002286-RA	0	1389	0	0	0
AAEL010719-RA	0	819	0	0	0
AAEL007213-RA	0	1362	0	0	0
AAEL000261-RA	0	1485	0	0	0
AAEL010752-RA	0	1113	0	0	0
AAEL006978-RA	0	2605	0	0	0
AAEL001581-RA	0	2739	0	0	0
AAEL010104-RA	0	891	0	0	0
AAEL007090-RA	0	948	0	0	0
AAEL003645-RA	0	1729	0	0	0
AAEL004143-RA	0	1487	0	0	0
AAEL014874-RA	0	915	0	0	0
AAEL003246-RA	0	1248	0	0	0
AAEL011491-RA	0	668	0	0	0
AAEL009773-RA	0	1241	0	0	0
AAEL009773-RB	0	1238	0	0	0
AAEL009773-RC	0	901	0	0	0
AAEL000231-RA	0	2495	0	0	0
AAEL006238-RA	0	740	0	0	0
AAEL006238-RB	0	737	0	0	0
AAEL012570-RA	0	666	0	0	0
AAEL005904-RA	0	1794	0	0	0
AAEL006196-RA	0	2568	0	0	0
AAEL014774-RA	0	5211	0	0	0
AAEL015121-RA	0	916	0	0	0
AAEL013166-RA	0	1250	0	0	0
AAEL009476-RA	0	715	0	0	0
AAEL000524-RA	0	543	0	0	0
AAEL014374-RA	0	602	0	0	0
AAEL007347-RA	0	1713	0	0	0
AAEL003516-RA	0	2023	0	0	0
AAEL000222-RA	0	678	0	0	0
AAEL011512-RA	0	1728	0	0	0
AAEL003028-RA	0	717	0	0	0
AAEL008149-RA	0	192	0	0	0
AAEL005116-RA	0	156	0	0	0
AAEL008656-RA	0	1356	0	0	0
AAEL006053-RA	0	1183	0	0	0
AAEL011784-RA	0	1260	0	0	0
AAEL009435-RA	0	477	0	0	0
AAEL005168-RA	0	753	0	0	0
AAEL002154-RA	0	399	0	0	0
AAEL014834-RA	0	787	0	0	0
AAEL014749-RA	0	1616	0	0	0
AAEL014749-RB	0	1523	0	0	0
AAEL010664-RA	0	745	0	0	0
AAEL006404-RA	0	831	0	0	0
AAEL005745-RA	0	687	0	0	0
AAEL009910-RA	0	1875	0	0	0
AAEL005418-RA	0	642	0	0	0
AAEL002360-RA	0	886	0	0	0
AAEL000422-RA	0	1626	0	0	0
AAEL002593-RA	0	1341	0	0	0
AAEL002593-RB	0	1361	0	0	0
AAEL009053-RA	0	1467	0	0	0
AAEL003745-RA	0	1077	0	0	0
AAEL014282-RA	0	1669	0	0	0
AAEL004800-RA	0	1493	0	0	0
AAEL006743-RA	0	564	0	0	0
AAEL006212-RA	0	2043	0	0	0
AAEL001542-RA	0	1056	0	0	0
AAEL013799-RA	0	1319	0	0	0
AAEL013799-RB	0	1543	0	0	0
AAEL012632-RA	0	2389	0	0	0
AAEL009668-RA	0	4146	0	0	0
AAEL002090-RA	0	1518	0	0	0
AAEL005272-RA	0	3725	0	0	0
AAEL000226-RA	0	1039	0	0	0
AAEL007876-RA	0	2280	0	0	0
AAEL006836-RA	0	1106	0	0	0
AAEL006836-RB	0	979	0	0	0
AAEL004820-RA	0	1002	0	0	0
AAEL001257-RA	0	2269	0	0	0
AAEL000705-RA	0	1032	0	0	0
AAEL014095-RA	0	2670	0	0	0
AAEL004844-RA	0	2394	0	0	0
AAEL004263-RA	0	673	0	0	0
AAEL000522-RA	0	1407	0	0	0
AAEL015042-RA	0	726	0	0	0
AAEL008326-RA	0	339	0	0	0
AAEL001900-RA	0	2030	0	0	0
AAEL010642-RA	0	1352	0	0	0
AAEL009685-RA	0	1005	0	0	0
AAEL009685-RB	0	1097	0	0	0
AAEL005798-RA	0	1491	0	0	0
AAEL004275-RA	0	741	0	0	0
AAEL002713-RA	0	1138	0	0	0
AAEL014727-RA	0	876	0	0	0
AAEL010400-RA	0	333	0	0	0
AAEL001230-RA	0	2565	0	0	0
AAEL012131-RA	0	2634	0	0	0
AAEL008353-RB	0	676	0	0	0
AAEL012862-RA	0	683	0	0	0
AAEL003217-RA	0	561	0	0	0
AAEL002302-RA	0	591	0	0	0
AAEL000272-RA	0	814	0	0	0
AAEL008069-RA	0	10203	0	0	0
AAEL004095-RA	0	1346	0	0	0
AAEL000469-RA	0	2016	0	0	0
AAEL007531-RA	0	1731	0	0	0
AAEL008031-RA	0	999	0	0	0
AAEL008427-RA	0	2147	0	0	0
AAEL003356-RA	0	828	0	0	0
AAEL014316-RA	0	1821	0	0	0
AAEL001510-RA	0	1209	0	0	0
AAEL004727-RA	0	2171	0	0	0
AAEL004727-RB	0	2126	0	0	0
AAEL009163-RA	0	252	0	0	0
AAEL009681-RA	0	1818	0	0	0
AAEL008787-RA	0	3108	0	0	0
AAEL001156-RA	0	1385	0	0	0
AAEL014161-RA	0	2164	0	0	0
AAEL008077-RA	0	2831	0	0	0
AAEL002338-RA	0	2457	0	0	0
AAEL001690-RA	0	1117	0	0	0
AAEL013354-RA	0	1239	0	0	0
AAEL008202-RA	0	939	0	0	0
AAEL003783-RA	0	1236	0	0	0
AAEL006601-RA	0	1242	0	0	0
AAEL008977-RA	0	348	0	0	0
AAEL008820-RA	0	977	0	0	0
AAEL001124-RA	0	1901	0	0	0
AAEL002027-RA	0	378	0	0	0
AAEL004713-RA	0	1664	0	0	0
AAEL001146-RA	0	1659	0	0	0
AAEL008418-RA	0	1262	0	0	0
AAEL008418-RB	0	1297	0	0	0
AAEL014988-RA	0	306	0	0	0
AAEL011500-RA	0	1053	0	0	0
AAEL011500-RB	0	989	0	0	0
AAEL011500-RC	0	2179	0	0	0
AAEL008436-RA	0	396	0	0	0
AAEL005948-RA	0	435	0	0	0
AAEL002134-RA	0	742	0	0	0
AAEL009468-RA	0	519	0	0	0
AAEL003808-RA	0	1907	0	0	0
AAEL006273-RA	0	1608	0	0	0
AAEL011463-RA	0	1700	0	0	0
AAEL006374-RA	0	1654	0	0	0
AAEL015551-RA	0	685	0	0	0
AAEL013737-RA	0	759	0	0	0
AAEL003002-RA	0	2487	0	0	0
AAEL001161-RA	0	1359	0	0	0
AAEL004317-RA	0	1875	0	0	0
AAEL001735-RA	0	420	0	0	0
AAEL006806-RA	0	4454	0	0	0
AAEL014535-RA	0	822	0	0	0
AAEL012088-RA	0	2250	0	0	0
AAEL002452-RA	0	390	0	0	0
AAEL009114-RA	0	639	0	0	0
AAEL002098-RA	0	2940	0	0	0
AAEL001250-RA	0	2085	0	0	0
AAEL011260-RA	0	1371	0	0	0
AAEL005622-RA	0	706	0	0	0
AAEL008793-RA	0	1729	0	0	0
AAEL001372-RA	0	3721	0	0	0
AAEL001372-RB	0	2487	0	0	0
AAEL009281-RA	0	1533	0	0	0
AAEL005895-RA	0	2271	0	0	0
AAEL005555-RA	0	270	0	0	0
AAEL003590-RA	0	706	0	0	0
AAEL010452-RA	0	1363	0	0	0
AAEL015403-RA	0	1188	0	0	0
AAEL005736-RA	0	2297	0	0	0
AAEL005736-RC	0	2300	0	0	0
AAEL012169-RA	0	1220	0	0	0
AAEL010700-RA	0	306	0	0	0
AAEL003076-RA	0	1735	0	0	0
AAEL007571-RA	0	168	0	0	0
AAEL003397-RA	0	758	0	0	0
AAEL007106-RA	0	968	0	0	0
AAEL006284-RA	0	875	0	0	0
AAEL004120-RA	0	907	0	0	0
AAEL005337-RA	0	1530	0	0	0
AAEL007847-RA	0	5169	0	0	0
AAEL014851-RA	0	4521	0	0	0
AAEL008308-RA	0	570	0	0	0
AAEL004380-RA	0	1002	0	0	0
AAEL003792-RA	0	1737	0	0	0
AAEL012625-RA	0	825	0	0	0
AAEL014996-RA	0	441	0	0	0
AAEL014913-RA	0	2422	0	0	0
AAEL012651-RA	0	786	0	0	0
AAEL003817-RA	0	1435	0	0	0
AAEL006411-RA	0	4249	0	0	0
AAEL006411-RB	0	4276	0	0	0
AAEL006854-RA	0	1025	0	0	0
AAEL004812-RA	0	4935	0	0	0
AAEL008313-RA	0	537	0	0	0
AAEL013906-RA	0	1296	0	0	0
AAEL012577-RA	0	1282	0	0	0
AAEL001576-RA	0	1236	0	0	0
AAEL008629-RA	0	2551	0	0	0
AAEL014738-RA	0	2218	0	0	0
AAEL011730-RA	0	456	0	0	0
AAEL011092-RA	0	4361	0	0	0
AAEL003753-RA	0	729	0	0	0
AAEL002725-RA	0	372	0	0	0
AAEL001642-RA	0	801	0	0	0
AAEL001642-RB	0	872	0	0	0
AAEL007145-RA	0	1143	0	0	0
AAEL004202-RA	0	791	0	0	0
AAEL008495-RA	0	3918	0	0	0
AAEL015455-RA	0	1946	0	0	0
AAEL013889-RA	0	666	0	0	0
AAEL013506-RA	0	954	0	0	0
AAEL012522-RA	0	1683	0	0	0
AAEL007524-RA	0	288	0	0	0
AAEL009520-RA	0	2441	0	0	0
AAEL012101-RA	0	1350	0	0	0
AAEL015117-RA	0	1245	0	0	0
AAEL013296-RA	0	2199	0	0	0
AAEL004303-RA	0	1698	0	0	0
AAEL004422-RA	0	1456	0	0	0
AAEL010450-RA	0	279	0	0	0
AAEL014489-RA	0	549	0	0	0
AAEL004124-RA	0	1442	0	0	0
AAEL004124-RB	0	2058	0	0	0
AAEL013823-RA	0	1927	0	0	0
AAEL012658-RA	0	1413	0	0	0
AAEL003740-RA	0	3058	0	0	0
AAEL005108-RA	0	660	0	0	0
AAEL009904-RA	0	1115	0	0	0
AAEL001711-RA	0	1512	0	0	0
AAEL008568-RA	0	1353	0	0	0
AAEL002431-RA	0	231	0	0	0
AAEL012249-RA	0	3009	0	0	0
AAEL013239-RA	0	4215	0	0	0
AAEL011339-RA	0	494	0	0	0
AAEL002589-RA	0	384	0	0	0
AAEL011047-RA	0	1596	0	0	0
AAEL009795-RA	0	8625	0	0	0
AAEL004817-RA	0	1164	0	0	0
AAEL007338-RA	0	534	0	0	0
AAEL006719-RA	0	2338	0	0	0
AAEL000921-RA	0	489	0	0	0
AAEL013979-RA	0	1154	0	0	0
AAEL013979-RB	0	1094	0	0	0
AAEL013979-RC	0	984	0	0	0
AAEL013979-RD	0	1004	0	0	0
AAEL013979-RE	0	1064	0	0	0
AAEL013617-RA	0	1538	0	0	0
AAEL007418-RA	0	1356	0	0	0
AAEL003113-RA	0	1021	0	0	0
AAEL000343-RA	0	5825	0	0	0
AAEL000343-RB	0	4367	0	0	0
AAEL013538-RA	0	2006	0	0	0
AAEL007713-RA	0	1265	0	0	0
AAEL004875-RA	0	3952	0	0	0
AAEL011380-RA	0	837	0	0	0
AAEL013855-RA	0	1071	0	0	0
AAEL012704-RA	0	618	0	0	0
AAEL012612-RA	0	4142	0	0	0
AAEL012612-RB	0	3441	0	0	0
AAEL000993-RA	0	1671	0	0	0
AAEL000695-RA	0	1107	0	0	0
AAEL006139-RA	0	2531	0	0	0
AAEL004525-RA	0	792	0	0	0
AAEL015612-RA	0	1494	0	0	0
AAEL010381-RA	0	1608	0	0	0
AAEL007925-RA	0	321	0	0	0
AAEL006964-RA	0	1132	0	0	0
AAEL004336-RA	0	1704	0	0	0
AAEL001624-RA	0	940	0	0	0
AAEL002100-RA	0	1635	0	0	0
AAEL002100-RB	0	1619	0	0	0
AAEL013770-RA	0	3063	0	0	0
AAEL000665-RA	0	633	0	0	0
AAEL015600-RA	0	231	0	0	0
AAEL011681-RA	0	2364	0	0	0
AAEL006489-RA	0	2161	0	0	0
AAEL006489-RB	0	2213	0	0	0
AAEL002119-RA	0	1907	0	0	0
AAEL002414-RA	0	1200	0	0	0
AAEL005998-RA	0	3362	0	0	0
AAEL005998-RB	0	3509	0	0	0
AAEL005411-RA	0	2340	0	0	0
AAEL014823-RA	0	777	0	0	0
AAEL007774-RA	0	1068	0	0	0
AAEL007032-RA	0	1347	0	0	0
AAEL004913-RA	0	528	0	0	0
AAEL004417-RA	0	1392	0	0	0
AAEL002341-RA	0	2565	0	0	0
AAEL001417-RA	0	1068	0	0	0
AAEL009287-RA	0	1833	0	0	0
AAEL010858-RA	0	1638	0	0	0
AAEL007578-RA	0	1966	0	0	0
AAEL006907-RA	0	597	0	0	0
AAEL002052-RA	0	681	0	0	0
AAEL006738-RA	0	1650	0	0	0
AAEL014220-RA	0	1126	0	0	0
AAEL014071-RA	0	2651	0	0	0
AAEL005466-RA	0	458	0	0	0
AAEL010005-RA	0	1676	0	0	0
AAEL010376-RA	0	899	0	0	0
AAEL002076-RA	0	298	0	0	0
AAEL000388-RA	0	3868	0	0	0
AAEL005722-RA	0	1172	0	0	0
AAEL012100-RA	0	1305	0	0	0
AAEL007426-RA	0	2257	0	0	0
AAEL004480-RA	0	2743	0	0	0
AAEL002996-RA	0	1675	0	0	0
AAEL006258-RA	0	1446	0	0	0
AAEL003477-RA	0	868	0	0	0
AAEL001389-RA	0	2851	0	0	0
AAEL007097-RA	0	1285	0	0	0
AAEL003617-RA	0	996	0	0	0
AAEL011025-RA	0	1680	0	0	0
AAEL001856-RA	0	1762	0	0	0
AAEL001856-RB	0	1415	0	0	0
AAEL005327-RA	0	924	0	0	0
AAEL013132-RA	0	1862	0	0	0
AAEL013132-RB	0	2331	0	0	0
AAEL013132-RC	0	2797	0	0	0
AAEL014203-RA	0	1818	0	0	0
AAEL003419-RA	0	2645	0	0	0
AAEL015302-RA	0	558	0	0	0
AAEL012129-RA	0	1908	0	0	0
AAEL011805-RA	0	951	0	0	0
AAEL015337-RA	0	2489	0	0	0
AAEL004584-RA	0	896	0	0	0
AAEL006585-RA	0	1021	0	0	0
AAEL014720-RA	0	1863	0	0	0
AAEL001072-RA	0	942	0	0	0
AAEL000875-RA	0	1402	0	0	0
AAEL011330-RA	0	1284	0	0	0
AAEL013758-RA	0	714	0	0	0
AAEL014227-RA	0	1119	0	0	0
AAEL007596-RA	0	996	0	0	0
AAEL014868-RA	0	3148	0	0	0
AAEL013106-RA	0	672	0	0	0
AAEL013902-RA	0	1998	0	0	0
AAEL000483-RA	0	3385	0	0	0
AAEL009576-RA	0	914	0	0	0
AAEL006577-RA	0	2031	0	0	0
AAEL011548-RA	0	1798	0	0	0
AAEL003608-RA	0	7770	0	0	0
AAEL002584-RA	0	758	0	0	0
AAEL004485-RA	0	2848	0	0	0
AAEL014089-RA	0	1341	0	0	0
AAEL006483-RA	0	956	0	0	0
AAEL007738-RA	0	1799	0	0	0
AAEL002920-RA	0	653	0	0	0
AAEL011371-RA	0	2087	0	0	0
AAEL005871-RA	0	3540	0	0	0
AAEL000306-RA	0	453	0	0	0
AAEL013112-RA	0	1692	0	0	0
AAEL001716-RA	0	5115	0	0	0
AAEL001716-RB	0	5189	0	0	0
AAEL011976-RA	0	360	0	0	0
AAEL015583-RA	0	297	0	0	0
AAEL014501-RA	0	629	0	0	0
AAEL005715-RA	0	832	0	0	0
AAEL008376-RA	0	1456	0	0	0
AAEL002438-RA	0	450	0	0	0
AAEL008691-RA	0	1119	0	0	0
AAEL013571-RA	0	345	0	0	0
AAEL002977-RA	0	255	0	0	0
AAEL014882-RA	0	1438	0	0	0
AAEL005120-RA	0	1847	0	0	0
AAEL014186-RA	0	903	0	0	0
AAEL000359-RA	0	630	0	0	0
AAEL006482-RA	0	3153	0	0	0
AAEL014234-RA	0	638	0	0	0
AAEL000517-RA	0	312	0	0	0
AAEL003558-RA	0	3528	0	0	0
AAEL002220-RA	0	489	0	0	0
AAEL004459-RA	0	996	0	0	0
AAEL013880-RA	0	678	0	0	0
AAEL004439-RA	0	994	0	0	0
AAEL001340-RA	0	2682	0	0	0
AAEL009257-RA	0	438	0	0	0
AAEL011058-RA	0	1731	0	0	0
AAEL006985-RA	0	1059	0	0	0
AAEL006685-RA	0	219	0	0	0
AAEL013009-RA	0	793	0	0	0
AAEL004471-RA	0	3091	0	0	0
AAEL013028-RA	0	1589	0	0	0
AAEL003961-RA	0	1223	0	0	0
AAEL007443-RA	0	2109	0	0	0
AAEL007443-RB	0	1988	0	0	0
AAEL014078-RA	0	1486	0	0	0
AAEL011826-RA	0	2031	0	0	0
AAEL010784-RA	0	2275	0	0	0
AAEL008926-RA	0	195	0	0	0
AAEL010347-RA	0	1154	0	0	0
AAEL007813-RA	0	2368	0	0	0
AAEL004656-RA	0	744	0	0	0
AAEL009009-RA	0	306	0	0	0
AAEL001844-RA	0	1378	0	0	0
AAEL002044-RA	0	958	0	0	0
AAEL000352-RA	0	461	0	0	0
AAEL005584-RA	0	1593	0	0	0
AAEL007622-RA	0	574	0	0	0
AAEL014760-RA	0	1001	0	0	0
AAEL014593-RA	0	438	0	0	0
AAEL008586-RA	0	333	0	0	0
AAEL014614-RA	0	1660	0	0	0
AAEL011655-RA	0	1448	0	0	0
AAEL013642-RA	0	1493	0	0	0
AAEL009890-RA	0	2008	0	0	0
AAEL012210-RA	0	234	0	0	0
AAEL011345-RA	0	1662	0	0	0
AAEL008228-RA	0	957	0	0	0
AAEL006320-RA	0	5646	0	0	0
AAEL007055-RA	0	1056	0	0	0
AAEL015468-RA	0	582	0	0	0
AAEL014791-RA	0	474	0	0	0
AAEL008637-RA	0	732	0	0	0
AAEL012913-RA	0	1212	0	0	0
AAEL000360-RA	0	1090	0	0	0
AAEL011749-RA	0	918	0	0	0
AAEL009482-RA	0	2973	0	0	0
AAEL001102-RA	0	1434	0	0	0
AAEL010724-RA	0	555	0	0	0
AAEL008685-RA	0	1038	0	0	0
AAEL006477-RA	0	1441	0	0	0
AAEL011573-RA	0	5508	0	0	0
AAEL001557-RA	0	2572	0	0	0
AAEL004640-RA	0	555	0	0	0
AAEL009446-RA	0	1032	0	0	0
AAEL008428-RA	0	1521	0	0	0
AAEL007515-RA	0	456	0	0	0
AAEL012269-RA	0	963	0	0	0
AAEL005395-RA	0	1755	0	0	0
AAEL004894-RA	0	760	0	0	0
AAEL000903-RA	0	445	0	0	0
AAEL012748-RA	0	861	0	0	0
AAEL008630-RA	0	1700	0	0	0
AAEL005022-RA	0	2637	0	0	0
AAEL007784-RA	0	1295	0	0	0
AAEL015356-RA	0	1846	0	0	0
AAEL010557-RA	0	624	0	0	0
AAEL008931-RA	0	1677	0	0	0
AAEL004945-RA	0	1189	0	0	0
AAEL004945-RB	0	1314	0	0	0
AAEL009952-RA	0	1327	0	0	0
AAEL007991-RA	0	774	0	0	0
AAEL000684-RA	0	415	0	0	0
AAEL003186-RA	0	297	0	0	0
AAEL012270-RA	0	459	0	0	0
AAEL009461-RA	0	1086	0	0	0
AAEL004009-RA	0	1887	0	0	0
AAEL010934-RA	0	1021	0	0	0
AAEL004002-RA	0	2468	0	0	0
AAEL002375-RA	0	1079	0	0	0
AAEL003976-RA	0	3012	0	0	0
AAEL009837-RA	0	1200	0	0	0
AAEL001958-RA	0	1099	0	0	0
AAEL000153-RA	0	3915	0	0	0
AAEL011140-RA	0	1848	0	0	0
AAEL003270-RA	0	1477	0	0	0
AAEL004119-RA	0	2081	0	0	0
AAEL009237-RA	0	1597	0	0	0
AAEL002577-RA	0	531	0	0	0
AAEL012352-RA	0	597	0	0	0
AAEL004363-RA	0	2772	0	0	0
AAEL003950-RA	0	2314	0	0	0
AAEL000563-RA	0	483	0	0	0
AAEL010687-RA	0	822	0	0	0
AAEL011347-RA	0	1692	0	0	0
AAEL007900-RA	0	676	0	0	0
AAEL007900-RB	0	713	0	0	0
AAEL007900-RC	0	613	0	0	0
AAEL013718-RA	0	858	0	0	0
AAEL005127-RA	0	716	0	0	0
AAEL014016-RA	0	1109	0	0	0
AAEL003317-RA	0	1114	0	0	0
AAEL010809-RA	0	1447	0	0	0
AAEL003067-RA	0	1171	0	0	0
AAEL003067-RB	0	1369	0	0	0
AAEL013000-RA	0	1260	0	0	0
AAEL009182-RA	0	2040	0	0	0
AAEL006427-RA	0	798	0	0	0
AAEL010909-RA	0	730	0	0	0
AAEL007857-RA	0	4373	0	0	0
AAEL014275-RA	0	1325	0	0	0
AAEL009625-RA	0	1341	0	0	0
AAEL010080-RA	0	3040	0	0	0
AAEL008361-RA	0	861	0	0	0
AAEL008361-RB	0	952	0	0	0
AAEL003009-RA	0	1925	0	0	0
AAEL014907-RA	0	1806	0	0	0
AAEL014769-RA	0	390	0	0	0
AAEL013841-RA	0	2301	0	0	0
AAEL000311-RA	0	2145	0	0	0
AAEL011253-RA	0	5391	0	0	0
AAEL011989-RA	0	2050	0	0	0
AAEL011989-RB	0	2533	0	0	0
AAEL004256-RA	0	1847	0	0	0
AAEL010547-RA	0	465	0	0	0
AAEL004568-RA	0	942	0	0	0
AAEL006148-RA	0	3126	0	0	0
AAEL001550-RA	0	172	0	0	0
AAEL013556-RA	0	1533	0	0	0
AAEL011386-RA	0	1310	0	0	0
AAEL011386-RB	0	1815	0	0	0
AAEL010297-RA	0	321	0	0	0
AAEL004030-RA	0	837	0	0	0
AAEL010873-RA	0	1707	0	0	0
AAEL010590-RA	0	1636	0	0	0
AAEL008472-RA	0	1500	0	0	0
AAEL012409-RA	0	1113	0	0	0
AAEL009086-RA	0	745	0	0	0
AAEL001999-RA	0	387	0	0	0
AAEL005157-RA	0	807	0	0	0
AAEL007027-RA	0	1406	0	0	0
AAEL001788-RA	0	1419	0	0	0
AAEL010369-RA	0	1047	0	0	0
AAEL001804-RA	0	3191	0	0	0
AAEL007327-RA	0	267	0	0	0
AAEL007075-RA	0	1601	0	0	0
AAEL000369-RA	0	690	0	0	0
AAEL006611-RA	0	1215	0	0	0
AAEL003468-RA	0	1074	0	0	0
AAEL007199-RA	0	918	0	0	0
AAEL006629-RA	0	435	0	0	0
AAEL008279-RA	0	1038	0	0	0
AAEL009023-RA	0	1480	0	0	0
AAEL002517-RA	0	1352	0	0	0
AAEL002517-RB	0	1106	0	0	0
AAEL012988-RA	0	2409	0	0	0
AAEL004010-RA	0	1960	0	0	0
AAEL004010-RB	0	1957	0	0	0
AAEL004010-RC	0	2023	0	0	0
AAEL004010-RD	0	2020	0	0	0
AAEL002500-RA	0	294	0	0	0
AAEL000866-RA	0	246	0	0	0
AAEL011300-RA	0	1656	0	0	0
AAEL013273-RA	0	854	0	0	0
AAEL012877-RA	0	844	0	0	0
AAEL003576-RA	0	585	0	0	0
AAEL011980-RA	0	583	0	0	0
AAEL003382-RA	0	2235	0	0	0
AAEL003382-RB	0	1945	0	0	0
AAEL010436-RA	0	288	0	0	0
AAEL008705-RA	0	4863	0	0	0
AAEL012368-RA	0	873	0	0	0
AAEL009500-RA	0	1756	0	0	0
AAEL003986-RA	0	805	0	0	0
AAEL003986-RB	0	1064	0	0	0
AAEL003986-RC	0	997	0	0	0
AAEL003986-RD	0	955	0	0	0
AAEL003986-RE	0	943	0	0	0
AAEL014406-RA	0	2306	0	0	0
AAEL003390-RA	0	932	0	0	0
AAEL001437-RA	0	1473	0	0	0
AAEL008732-RA	0	2959	0	0	0
AAEL011005-RA	0	1605	0	0	0
AAEL006184-RA	0	1893	0	0	0
AAEL013043-RA	0	258	0	0	0
AAEL013326-RA	0	1338	0	0	0
AAEL008440-RA	0	660	0	0	0
AAEL001905-RA	0	710	0	0	0
AAEL009841-RA	0	603	0	0	0
AAEL004304-RA	0	207	0	0	0
AAEL000802-RA	0	2612	0	0	0
AAEL011418-RA	0	351	0	0	0
AAEL005203-RA	0	1280	0	0	0
AAEL011744-RA	0	1912	0	0	0
AAEL010340-RB	0	1838	0	0	0
AAEL006704-RA	0	1171	0	0	0
AAEL004172-RA	0	2339	0	0	0
AAEL002993-RA	0	676	0	0	0
AAEL001137-RA	0	1728	0	0	0
AAEL014832-RA	0	861	0	0	0
AAEL012693-RA	0	1374	0	0	0
AAEL004973-RA	0	876	0	0	0
AAEL001634-RA	0	459	0	0	0
AAEL013788-RA	0	1764	0	0	0
AAEL012849-RA	0	1153	0	0	0
AAEL012849-RB	0	1158	0	0	0
AAEL000050-RA	0	998	0	0	0
AAEL002263-RA	0	651	0	0	0
AAEL002263-RB	0	648	0	0	0
AAEL000456-RA	0	655	0	0	0
AAEL010017-RA	0	1322	0	0	0
AAEL008000-RA	0	1706	0	0	0
AAEL006393-RA	0	969	0	0	0
AAEL015372-RA	0	1971	0	0	0
AAEL004639-RA	0	1077	0	0	0
AAEL003821-RA	0	434	0	0	0
AAEL009036-RA	0	1209	0	0	0
AAEL005514-RA	0	216	0	0	0
AAEL000791-RA	0	859	0	0	0
AAEL004784-RA	0	1047	0	0	0
AAEL008885-RA	0	816	0	0	0
AAEL003799-RA	0	3568	0	0	0
AAEL009594-RA	0	2328	0	0	0
AAEL006712-RA	0	1145	0	0	0
AAEL001265-RA	0	903	0	0	0
AAEL007589-RA	0	4560	0	0	0
AAEL006457-RA	0	1810	0	0	0
AAEL015127-RA	0	2498	0	0	0
AAEL013836-RA	0	1134	0	0	0
AAEL006263-RA	0	1048	0	0	0
AAEL010570-RA	0	1557	0	0	0
AAEL005825-RA	0	1328	0	0	0
AAEL012639-RA	0	543	0	0	0
AAEL001848-RA	0	1329	0	0	0
AAEL015667-RA	0	1033	0	0	0
AAEL013706-RA	0	913	0	0	0
AAEL012345-RA	0	1621	0	0	0
AAEL003129-RA	0	4166	0	0	0
AAEL010464-RA	0	2657	0	0	0
AAEL010464-RB	0	2699	0	0	0
AAEL010464-RC	0	2655	0	0	0
AAEL014128-RA	0	1015	0	0	0
AAEL009811-RA	0	384	0	0	0
AAEL008997-RA	0	390	0	0	0
AAEL012898-RA	0	480	0	0	0
AAEL007421-RA	0	996	0	0	0
AAEL009677-RA	0	3366	0	0	0
AAEL006918-RA	0	1288	0	0	0
AAEL006918-RB	0	1350	0	0	0
AAEL000147-RA	0	749	0	0	0
AAEL005912-RA	0	351	0	0	0
AAEL002637-RA	0	1041	0	0	0
AAEL001301-RA	0	957	0	0	0
AAEL001522-RA	0	1737	0	0	0
AAEL012322-RA	0	513	0	0	0
AAEL001060-RA	0	2376	0	0	0
AAEL009394-RA	0	1527	0	0	0
AAEL005538-RA	0	1012	0	0	0
AAEL012014-RA	0	996	0	0	0
AAEL009653-RB	0	760	0	0	0
AAEL010975-RA	0	3659	0	0	0
AAEL004553-RA	0	1383	0	0	0
AAEL002818-RA	0	1485	0	0	0
AAEL012142-RA	0	1664	0	0	0
AAEL007190-RA	0	1785	0	0	0
AAEL007371-RA	0	753	0	0	0
AAEL003596-RA	0	1182	0	0	0
AAEL013191-RA	0	234	0	0	0
AAEL010035-RA	0	1682	0	0	0
AAEL011129-RA	0	1670	0	0	0
AAEL010462-RA	0	1752	0	0	0
AAEL010026-RA	0	534	0	0	0
AAEL013475-RA	0	2715	0	0	0
AAEL006499-RA	0	2013	0	0	0
AAEL012339-RA	0	1386	0	0	0
AAEL012339-RB	0	1353	0	0	0
AAEL009658-RA	0	2274	0	0	0
AAEL009658-RB	0	2929	0	0	0
AAEL009658-RC	0	2326	0	0	0
AAEL008938-RA	0	2047	0	0	0
AAEL008938-RB	0	1477	0	0	0
AAEL005802-RA	0	3838	0	0	0
AAEL000541-RA	0	1525	0	0	0
AAEL000541-RB	0	2024	0	0	0
AAEL009386-RA	0	2582	0	0	0
AAEL003661-RA	0	1052	0	0	0
AAEL011869-RA	0	684	0	0	0
AAEL001665-RA	0	339	0	0	0
AAEL013471-RA	0	1642	0	0	0
AAEL003879-RA	0	1548	0	0	0
AAEL000910-RA	0	1568	0	0	0
AAEL010126-RA	0	1080	0	0	0
AAEL011735-RA	0	657	0	0	0
AAEL005935-RA	0	1188	0	0	0
AAEL007512-RA	0	2300	0	0	0
AAEL002020-RA	0	905	0	0	0
AAEL015534-RA	0	1653	0	0	0
AAEL001243-RA	0	813	0	0	0
AAEL012392-RA	0	1986	0	0	0
AAEL008199-RA	0	1142	0	0	0
AAEL006927-RA	0	2789	0	0	0
AAEL000448-RA	0	2523	0	0	0
AAEL000448-RB	0	2520	0	0	0
AAEL010816-RA	0	1308	0	0	0
AAEL000893-RA	0	1910	0	0	0
AAEL004857-RA	0	819	0	0	0
AAEL005495-RA	0	4365	0	0	0
AAEL003374-RA	0	1362	0	0	0
AAEL002019-RA	0	1251	0	0	0
AAEL000914-RA	0	950	0	0	0
AAEL015320-RA	0	1911	0	0	0
AAEL010103-RA	0	982	0	0	0
AAEL001618-RA	0	3075	0	0	0
AAEL008525-RA	0	1516	0	0	0
AAEL012478-RA	0	1023	0	0	0
AAEL013691-RA	0	390	0	0	0
AAEL003581-RA	0	2068	0	0	0
AAEL003581-RB	0	2041	0	0	0
AAEL009901-RA	0	767	0	0	0
AAEL009901-RB	0	664	0	0	0
AAEL009819-RA	0	633	0	0	0
AAEL010355-RA	0	2004	0	0	0
AAEL010239-RA	0	1087	0	0	0
AAEL014714-RA	0	728	0	0	0
AAEL009000-RA	0	348	0	0	0
AAEL011100-RA	0	434	0	0	0
AAEL008138-RA	0	2322	0	0	0
AAEL002747-RA	0	1652	0	0	0
AAEL012951-RA	0	10874	0	0	0
AAEL011907-RA	0	825	0	0	0
AAEL006993-RA	0	1287	0	0	0
AAEL006993-RB	0	2403	0	0	0
AAEL006993-RC	0	3675	0	0	0
AAEL002630-RA	0	1047	0	0	0
AAEL011755-RA	0	1890	0	0	0
AAEL011755-RB	0	2035	0	0	0
AAEL010089-RA	0	1223	0	0	0
AAEL009607-RA	0	4594	0	0	0
AAEL009607-RC	0	4540	0	0	0
AAEL009607-RD	0	4537	0	0	0
AAEL009607-RE	0	4582	0	0	0
AAEL011061-RA	0	3748	0	0	0
AAEL004073-RA	0	1026	0	0	0
AAEL014871-RA	0	1249	0	0	0
AAEL012502-RA	0	1216	0	0	0
AAEL003320-RA	0	2001	0	0	0
AAEL005716-RA	0	1227	0	0	0
AAEL014424-RA	0	699	0	0	0
AAEL010599-RA	0	5272	0	0	0
AAEL002164-RA	0	705	0	0	0
AAEL001398-RA	0	2604	0	0	0
AAEL010360-RA	0	1239	0	0	0
AAEL003122-RA	0	1376	0	0	0
AAEL007569-RA	0	3336	0	0	0
AAEL011987-RA	0	1128	0	0	0
AAEL012560-RA	0	1022	0	0	0
AAEL006440-RA	0	1416	0	0	0
AAEL006339-RA	0	2328	0	0	0
AAEL013369-RA	0	559	0	0	0
AAEL014191-RA	0	354	0	0	0
AAEL000318-RA	0	885	0	0	0
AAEL013075-RA	0	746	0	0	0
AAEL014064-RA	0	672	0	0	0
AAEL000100-RA	0	168	0	0	0
AAEL012292-RA	0	1701	0	0	0
AAEL006931-RA	0	3402	0	0	0
AAEL006931-RB	0	1967	0	0	0
AAEL006931-RC	0	3210	0	0	0
AAEL003157-RA	0	2971	0	0	0
AAEL011887-RA	0	672	0	0	0
AAEL000219-RA	0	1334	0	0	0
AAEL011874-RA	0	1276	0	0	0
AAEL012244-RA	0	519	0	0	0
AAEL012776-RA	0	2896	0	0	0
AAEL007022-RA	0	2395	0	0	0
AAEL006302-RA	0	957	0	0	0
AAEL001014-RA	0	2048	0	0	0
AAEL008256-RA	0	1281	0	0	0
AAEL000969-RA	0	492	0	0	0
AAEL012726-RA	0	1002	0	0	0
AAEL006756-RA	0	1005	0	0	0
AAEL000770-RA	0	1613	0	0	0
AAEL014492-RA	0	434	0	0	0
AAEL012042-RA	0	1191	0	0	0
AAEL009699-RA	0	429	0	0	0
AAEL005043-RA	0	4575	0	0	0
AAEL003211-RA	0	2346	0	0	0
AAEL009489-RA	0	1269	0	0	0
AAEL005820-RA	0	3705	0	0	0
AAEL001538-RA	0	1106	0	0	0
AAEL006726-RA	0	1481	0	0	0
AAEL007086-RA	0	309	0	0	0
AAEL005581-RA	0	2043	0	0	0
AAEL006862-RA	0	1748	0	0	0
AAEL013762-RA	0	612	0	0	0
AAEL008879-RA	0	1855	0	0	0
AAEL008879-RB	0	1693	0	0	0
AAEL006293-RA	0	1044	0	0	0
AAEL007759-RA	0	5862	0	0	0
AAEL003057-RA	0	965	0	0	0
AAEL003057-RB	0	887	0	0	0
AAEL011503-RA	0	333	0	0	0
AAEL006387-RA	0	858	0	0	0
AAEL006092-RA	0	1158	0	0	0
AAEL004354-RA	0	372	0	0	0
AAEL004497-RA	0	1639	0	0	0
AAEL008114-RA	0	399	0	0	0
AAEL006219-RA	0	1140	0	0	0
AAEL011350-RA	0	2985	0	0	0
AAEL007049-RA	0	1067	0	0	0
AAEL013062-RA	0	1052	0	0	0
AAEL011936-RA	0	876	0	0	0
AAEL009090-RA	0	847	0	0	0
AAEL005452-RA	0	2220	0	0	0
AAEL000694-RA	0	951	0	0	0
AAEL011156-RA	0	1383	0	0	0
AAEL009865-RA	0	1116	0	0	0
AAEL012842-RA	0	1107	0	0	0
AAEL003903-RA	0	1796	0	0	0
AAEL000947-RA	0	954	0	0	0
AAEL005039-RA	0	1569	0	0	0
AAEL002012-RA	0	1776	0	0	0
AAEL011012-RA	0	1596	0	0	0
AAEL009719-RA	0	3237	0	0	0
AAEL009719-RB	0	2841	0	0	0
AAEL012321-RA	0	1005	0	0	0
AAEL001194-RA	0	8455	0	0	0
AAEL006015-RA	0	868	0	0	0
AAEL014691-RA	0	1521	0	0	0
AAEL013565-RA	0	2135	0	0	0
AAEL007069-RA	0	3217	0	0	0
AAEL000026-RA	0	787	0	0	0
AAEL012809-RA	0	1334	0	0	0
AAEL012118-RA	0	2046	0	0	0
AAEL005352-RA	0	705	0	0	0
AAEL005029-RA	0	756	0	0	0
AAEL002788-RA	0	3738	0	0	0
AAEL005471-RA	0	763	0	0	0
AAEL004240-RA	0	1734	0	0	0
AAEL010427-RA	0	1610	0	0	0
AAEL015461-RA	0	933	0	0	0
AAEL010866-RA	0	927	0	0	0
AAEL007333-RA	0	1245	0	0	0
AAEL001977-RA	0	6111	0	0	0
AAEL010697-RA	0	1458	0	0	0
AAEL010697-RB	0	1440	0	0	0
AAEL014968-RA	0	1419	0	0	0
AAEL011820-RA	0	747	0	0	0
AAEL004634-RA	0	4540	0	0	0
AAEL006367-RA	0	1294	0	0	0
AAEL002566-RA	0	1723	0	0	0
AAEL012038-RA	0	1638	0	0	0
AAEL006598-RA	0	986	0	0	0
AAEL001732-RA	0	1392	0	0	0
AAEL001291-RA	0	417	0	0	0
AAEL014961-RA	0	1149	0	0	0
AAEL000848-RA	0	1177	0	0	0
AAEL002955-RA	0	1003	0	0	0
AAEL002955-RB	0	1011	0	0	0
AAEL015523-RA	0	707	0	0	0
AAEL014376-RA	0	1139	0	0	0
AAEL004687-RA	0	2253	0	0	0
AAEL000174-RA	0	1089	0	0	0
AAEL000125-RA	0	779	0	0	0
AAEL012174-RA	0	672	0	0	0
AAEL000754-RA	0	1071	0	0	0
AAEL010068-RA	0	1161	0	0	0
AAEL013380-RA	0	459	0	0	0
AAEL011840-RA	0	1248	0	0	0
AAEL006439-RA	0	633	0	0	0
AAEL010813-RA	0	2307	0	0	0
AAEL010894-RA	0	960	0	0	0
AAEL008514-RA	0	888	0	0	0
AAEL007685-RA	0	456	0	0	0
AAEL003400-RA	0	1347	0	0	0
AAEL001979-RA	0	1599	0	0	0
AAEL001979-RB	0	2119	0	0	0
[truncated: 16,761 more rows]
