# Supplementary material for: Arbovirus Detection in Insect Vectors by Rapid, High-Throughput Pyrosequencing
Source: PLoS Negl Trop Dis. 2010 Nov 9;4(11):e878. doi: 10.1371/journal.pntd.0000878 (PMC2976685; doi:10.1371/journal.pntd.0000878)
Supplement: Table S6 — Mapping of N2173 reads: reads obtained from sequencing N2173 library (5 DENV-1 infected mosquitoes) were mapped to the Ae. aegypti published genome sequence (top) and cross-matched against rRNA gene-containing contigs (bottom). (0.56 MB XLS) [file pntd.0000878.s006.xls]

## Sheet: N2173-refass-contigtab.csv
Contig	Length of consensus sequence	Number of reads	Average coverage	Reference sequences	Length of reference sequence	Common name reference	Latin name reference
AAGE02025420 contig	5325	5474	226.034	AAGE02025420	6193	Stegomyia aegypti	Aedes aegypti
AAGE02025425 contig	173108	190913	213.654	AAGE02025425	229667	Stegomyia aegypti	Aedes aegypti
AAGE02025424 contig	18829	19969	163.753	AAGE02025424	32924	Stegomyia aegypti	Aedes aegypti
AAGE02025428 contig	9125	10196	150.873	AAGE02025428	18154	Stegomyia aegypti	Aedes aegypti
AAGE02025423 contig	11185	12191	142.804	AAGE02025423	22897	Stegomyia aegypti	Aedes aegypti
AAGE02006997 contig	6274	6532	124.866	AAGE02006997	14220	Stegomyia aegypti	Aedes aegypti
AAGE02025421 contig	3829	3166	123.698	AAGE02025421	6421	Stegomyia aegypti	Aedes aegypti
AAGE02018811 contig	3829	4803	17.5908	AAGE02018811	81553	Stegomyia aegypti	Aedes aegypti
AAGE02025427 contig	1303	744	13.7289	AAGE02025427	14276	Stegomyia aegypti	Aedes aegypti
AAGE02018850 contig	556	383	11.7513	AAGE02018850	8407	Stegomyia aegypti	Aedes aegypti
AAGE02005101 contig	329	196	11.0396	AAGE02005101	4593	Stegomyia aegypti	Aedes aegypti
AAGE02014233 contig	347	581	8.76724	AAGE02014233	18134	Stegomyia aegypti	Aedes aegypti
AAGE02008523 contig	2599	3230	7.81487	AAGE02008523	118736	Stegomyia aegypti	Aedes aegypti
AAGE02033520 contig	459	376	7.14602	AAGE02033520	13785	Stegomyia aegypti	Aedes aegypti
AAGE02021061 contig	5046	1572	6.87603	AAGE02021061	84245	Stegomyia aegypti	Aedes aegypti
AAGE02015837 contig	5952	6069	6.60395	AAGE02015837	266885	Stegomyia aegypti	Aedes aegypti
AAGE02011634 contig	447	941	6.08846	AAGE02011634	43097	Stegomyia aegypti	Aedes aegypti
AAGE02015692 contig	6850	938	5.81794	AAGE02015692	56315	Stegomyia aegypti	Aedes aegypti
AAGE02024733 contig	527	46	2.77637	AAGE02024733	2026	Stegomyia aegypti	Aedes aegypti
AAGE02007950 contig	647	989	2.63365	AAGE02007950	114276	Stegomyia aegypti	Aedes aegypti
AAGE02007671 contig	393	197	2.51879	AAGE02007671	16201	Stegomyia aegypti	Aedes aegypti
AAGE02020259 contig	826	943	2.50949	AAGE02020259	108900	Stegomyia aegypti	Aedes aegypti
AAGE02010888 contig	790	266	2.04279	AAGE02010888	30918	Stegomyia aegypti	Aedes aegypti
AAGE02011873 contig	528	722	1.94861	AAGE02011873	112010	Stegomyia aegypti	Aedes aegypti
AAGE02001176 contig	918	257	1.72667	AAGE02001176	33859	Stegomyia aegypti	Aedes aegypti
AAGE02006930 contig	403	23	1.48921	AAGE02006930	2573	Stegomyia aegypti	Aedes aegypti
AAGE02000676 contig	793	1156	1.07777	AAGE02000676	333031	Stegomyia aegypti	Aedes aegypti
AAGE02002240 contig	1594	51	0.535615	AAGE02002240	13264	Stegomyia aegypti	Aedes aegypti
AAGE02030926 contig	311	48	0.367247	AAGE02030926	21913	Stegomyia aegypti	Aedes aegypti
AAGE02006436 contig	5720	81	0.339269	AAGE02006436	38538	Stegomyia aegypti	Aedes aegypti
AAGE02015557 contig	339	201	0.328299	AAGE02015557	137539	Stegomyia aegypti	Aedes aegypti
AAGE02009288 contig	511	9	0.299427	AAGE02009288	3665	Stegomyia aegypti	Aedes aegypti
AAGE02030898 contig	777	6	0.270901	AAGE02030898	4921	Stegomyia aegypti	Aedes aegypti
AAGE02006815 contig	1789	43	0.248733	AAGE02006815	29379	Stegomyia aegypti	Aedes aegypti
AAGE02026722 contig	346	9	0.243352	AAGE02026722	8714	Stegomyia aegypti	Aedes aegypti
AAGE02033765 contig	1383	16	0.233679	AAGE02033765	11743	Stegomyia aegypti	Aedes aegypti
AAGE02020348 contig	282	2	0.21833	AAGE02020348	2455	Stegomyia aegypti	Aedes aegypti
AAGE02021185 contig	2336	36	0.202029	AAGE02021185	40299	Stegomyia aegypti	Aedes aegypti
AAGE02017642 contig	406	73	0.179422	AAGE02017642	108034	Stegomyia aegypti	Aedes aegypti
AAGE02026297 contig	242	2	0.161065	AAGE02026297	3005	Stegomyia aegypti	Aedes aegypti
AAGE02009329 contig	381	85	0.158421	AAGE02009329	74021	Stegomyia aegypti	Aedes aegypti
AAGE02015499 contig	289	1	0.140914	AAGE02015499	2057	Stegomyia aegypti	Aedes aegypti
AAGE02013011 contig	235	12	0.136041	AAGE02013011	4652	Stegomyia aegypti	Aedes aegypti
AAGE02007214 contig	955	87	0.12751	AAGE02007214	94541	Stegomyia aegypti	Aedes aegypti
AAGE02005127 contig	157	33	0.12193	AAGE02005127	33628	Stegomyia aegypti	Aedes aegypti
AAGE02011709 contig	258	1	0.104369	AAGE02011709	2472	Stegomyia aegypti	Aedes aegypti
AAGE02013713 contig	306	2	0.0985442	AAGE02013713	6251	Stegomyia aegypti	Aedes aegypti
AAGE02008362 contig	270	1	0.0928473	AAGE02008362	2905	Stegomyia aegypti	Aedes aegypti
AAGE02007892 contig	244	1	0.0912112	AAGE02007892	2708	Stegomyia aegypti	Aedes aegypti
AAGE02019019 contig	530	8	0.0897523	AAGE02019019	20667	Stegomyia aegypti	Aedes aegypti
AAGE02011246 contig	256	1	0.0880633	AAGE02011246	2907	Stegomyia aegypti	Aedes aegypti
AAGE02004044 contig	269	2	0.0879555	AAGE02004044	5571	Stegomyia aegypti	Aedes aegypti
AAGE02024775 contig	727	7	0.0856959	AAGE02024775	14001	Stegomyia aegypti	Aedes aegypti
AAGE02011671 contig	252	1	0.0822992	AAGE02011671	3062	Stegomyia aegypti	Aedes aegypti
AAGE02007537 contig	589	4	0.0811825	AAGE02007537	8522	Stegomyia aegypti	Aedes aegypti
AAGE02003358 contig	1349	111	0.0809224	AAGE02003358	179694	Stegomyia aegypti	Aedes aegypti
AAGE02007820 contig	295	1	0.0775296	AAGE02007820	3805	Stegomyia aegypti	Aedes aegypti
AAGE02018649 contig	126	2	0.0765408	AAGE02018649	3016	Stegomyia aegypti	Aedes aegypti
AAGE02028320 contig	141	2	0.075066	AAGE02028320	2649	Stegomyia aegypti	Aedes aegypti
AAGE02010597 contig	930	24	0.0739047	AAGE02010597	55756	Stegomyia aegypti	Aedes aegypti
AAGE02024249 contig	418	3	0.0726349	AAGE02024249	7872	Stegomyia aegypti	Aedes aegypti
AAGE02015047 contig	123	29	0.072127	AAGE02015047	36096	Stegomyia aegypti	Aedes aegypti
AAGE02004350 contig	220	1	0.07168	AAGE02004350	3118	Stegomyia aegypti	Aedes aegypti
AAGE02034547 contig	260	2	0.070864	AAGE02034547	7338	Stegomyia aegypti	Aedes aegypti
AAGE02026305 contig	449	5	0.0701238	AAGE02026305	11549	Stegomyia aegypti	Aedes aegypti
AAGE02014724 contig	155	7	0.069661	AAGE02014724	8077	Stegomyia aegypti	Aedes aegypti
AAGE02005176 contig	402	2	0.0675155	AAGE02005176	5969	Stegomyia aegypti	Aedes aegypti
AAGE02001689 contig	352	2	0.0665406	AAGE02001689	5290	Stegomyia aegypti	Aedes aegypti
AAGE02022495 contig	252	3	0.0662506	AAGE02022495	10412	Stegomyia aegypti	Aedes aegypti
AAGE02023842 contig	157	1	0.0659983	AAGE02023842	2394	Stegomyia aegypti	Aedes aegypti
AAGE02014236 contig	173	1	0.0646246	AAGE02014236	2677	Stegomyia aegypti	Aedes aegypti
AAGE02009507 contig	1224	25	0.0623036	AAGE02009507	41038	Stegomyia aegypti	Aedes aegypti
AAGE02030710 contig	216	1	0.0618557	AAGE02030710	3492	Stegomyia aegypti	Aedes aegypti
AAGE02017127 contig	246	1	0.0601467	AAGE02017127	4090	Stegomyia aegypti	Aedes aegypti
AAGE02007057 contig	1257	18	0.0597841	AAGE02007057	36680	Stegomyia aegypti	Aedes aegypti
AAGE02007177 contig	294	40	0.057039	AAGE02007177	85525	Stegomyia aegypti	Aedes aegypti
AAGE02029551 contig	266	3	0.0554872	AAGE02029551	6506	Stegomyia aegypti	Aedes aegypti
AAGE02013184 contig	259	2	0.0542749	AAGE02013184	9544	Stegomyia aegypti	Aedes aegypti
AAGE02019979 contig	510	2	0.0538713	AAGE02019979	9466	Stegomyia aegypti	Aedes aegypti
AAGE02026551 contig	184	1	0.0533798	AAGE02026551	3447	Stegomyia aegypti	Aedes aegypti
AAGE02013136 contig	119	1	0.0533393	AAGE02013136	2231	Stegomyia aegypti	Aedes aegypti
AAGE02035800 contig	265	1	0.0530743	AAGE02035800	4993	Stegomyia aegypti	Aedes aegypti
AAGE02015897 contig	279	2	0.0524853	AAGE02015897	8988	Stegomyia aegypti	Aedes aegypti
AAGE02024120 contig	699	5	0.0518918	AAGE02024120	22621	Stegomyia aegypti	Aedes aegypti
AAGE02031105 contig	81	3	0.0512931	AAGE02031105	4640	Stegomyia aegypti	Aedes aegypti
AAGE02016888 contig	288	1	0.0502092	AAGE02016888	5736	Stegomyia aegypti	Aedes aegypti
AAGE02000464 contig	550	11	0.0499805	AAGE02000464	25609	Stegomyia aegypti	Aedes aegypti
AAGE02024245 contig	282	6	0.0499633	AAGE02024245	9541	Stegomyia aegypti	Aedes aegypti
AAGE02007911 contig	190	2	0.0496548	AAGE02007911	6807	Stegomyia aegypti	Aedes aegypti
AAGE02035277 contig	290	1	0.0496235	AAGE02035277	5844	Stegomyia aegypti	Aedes aegypti
AAGE02033931 contig	253	2	0.0488417	AAGE02033931	10360	Stegomyia aegypti	Aedes aegypti
AAGE02018336 contig	209	30	0.0487319	AAGE02018336	69740	Stegomyia aegypti	Aedes aegypti
AAGE02015285 contig	144	1	0.0478405	AAGE02015285	3010	Stegomyia aegypti	Aedes aegypti
AAGE02012480 contig	256	1	0.0470675	AAGE02012480	5439	Stegomyia aegypti	Aedes aegypti
AAGE02022465 contig	172	1	0.0464238	AAGE02022465	3705	Stegomyia aegypti	Aedes aegypti
AAGE02008227 contig	509	3	0.0462161	AAGE02008227	16055	Stegomyia aegypti	Aedes aegypti
AAGE02028827 contig	270	1	0.0460987	AAGE02028827	5857	Stegomyia aegypti	Aedes aegypti
AAGE02006253 contig	153	2	0.0454411	AAGE02006253	3389	Stegomyia aegypti	Aedes aegypti
AAGE02036083 contig	189	1	0.0451937	AAGE02036083	4182	Stegomyia aegypti	Aedes aegypti
AAGE02002712 contig	740	12	0.045046	AAGE02002712	38160	Stegomyia aegypti	Aedes aegypti
AAGE02007322 contig	1108	7	0.0447441	AAGE02007322	30327	Stegomyia aegypti	Aedes aegypti
AAGE02026272 contig	323	1	0.0442502	AAGE02026272	7320	Stegomyia aegypti	Aedes aegypti
AAGE02024609 contig	199	1	0.0435639	AAGE02024609	4568	Stegomyia aegypti	Aedes aegypti
AAGE02024734 contig	177	13	0.0434618	AAGE02024734	26341	Stegomyia aegypti	Aedes aegypti
AAGE02001224 contig	260	1	0.0434565	AAGE02001224	5983	Stegomyia aegypti	Aedes aegypti
AAGE02008872 contig	477	2	0.0431798	AAGE02008872	11068	Stegomyia aegypti	Aedes aegypti
AAGE02002608 contig	111	1	0.0429068	AAGE02002608	2585	Stegomyia aegypti	Aedes aegypti
AAGE02013200 contig	225	1	0.042349	AAGE02013200	5313	Stegomyia aegypti	Aedes aegypti
AAGE02034988 contig	267	1	0.0421136	AAGE02034988	6340	Stegomyia aegypti	Aedes aegypti
AAGE02026670 contig	116	1	0.04209	AAGE02026670	2756	Stegomyia aegypti	Aedes aegypti
AAGE02026429 contig	261	5	0.0420672	AAGE02026429	13835	Stegomyia aegypti	Aedes aegypti
AAGE02032771 contig	263	1	0.0420665	AAGE02032771	6251	Stegomyia aegypti	Aedes aegypti
AAGE02004240 contig	335	2	0.0402644	AAGE02004240	8320	Stegomyia aegypti	Aedes aegypti
AAGE02020799 contig	450	5	0.0398397	AAGE02020799	20697	Stegomyia aegypti	Aedes aegypti
AAGE02005900 contig	315	21	0.0397196	AAGE02005900	34663	Stegomyia aegypti	Aedes aegypti
AAGE02014990 contig	262	1	0.039607	AAGE02014990	6615	Stegomyia aegypti	Aedes aegypti
AAGE02017343 contig	214	2	0.0390444	AAGE02017343	9040	Stegomyia aegypti	Aedes aegypti
AAGE02035293 contig	227	1	0.0389432	AAGE02035293	5829	Stegomyia aegypti	Aedes aegypti
AAGE02012437 contig	1271	10	0.0386378	AAGE02012437	51269	Stegomyia aegypti	Aedes aegypti
AAGE02034691 contig	266	1	0.0380435	AAGE02034691	6990	Stegomyia aegypti	Aedes aegypti
AAGE02002697 contig	205	4	0.0379976	AAGE02002697	19314	Stegomyia aegypti	Aedes aegypti
AAGE02029824 contig	276	1	0.0379381	AAGE02029824	7275	Stegomyia aegypti	Aedes aegypti
AAGE02022689 contig	281	1	0.0379064	AAGE02022689	7412	Stegomyia aegypti	Aedes aegypti
AAGE02034766 contig	256	1	0.0378133	AAGE02034766	6815	Stegomyia aegypti	Aedes aegypti
AAGE02034693 contig	262	1	0.0374714	AAGE02034693	6987	Stegomyia aegypti	Aedes aegypti
AAGE02013420 contig	755	4	0.037008	AAGE02013420	20400	Stegomyia aegypti	Aedes aegypti
AAGE02011166 contig	372	2	0.0365725	AAGE02011166	10439	Stegomyia aegypti	Aedes aegypti
AAGE02007499 contig	217	6	0.0365641	AAGE02007499	8615	Stegomyia aegypti	Aedes aegypti
AAGE02015213 contig	773	4	0.0361137	AAGE02015213	21457	Stegomyia aegypti	Aedes aegypti
AAGE02028224 contig	616	3	0.0360777	AAGE02028224	17100	Stegomyia aegypti	Aedes aegypti
AAGE02011968 contig	88	2	0.0357143	AAGE02011968	4928	Stegomyia aegypti	Aedes aegypti
AAGE02036009 contig	160	1	0.0355872	AAGE02036009	4496	Stegomyia aegypti	Aedes aegypti
AAGE02005535 contig	365	3	0.0353471	AAGE02005535	14202	Stegomyia aegypti	Aedes aegypti
AAGE02020419 contig	366	4	0.0353366	AAGE02020419	14942	Stegomyia aegypti	Aedes aegypti
AAGE02003485 contig	251	1	0.0352677	AAGE02003485	7117	Stegomyia aegypti	Aedes aegypti
AAGE02025979 contig	277	1	0.0352122	AAGE02025979	7895	Stegomyia aegypti	Aedes aegypti
AAGE02035821 contig	174	1	0.035109	AAGE02035821	4956	Stegomyia aegypti	Aedes aegypti
AAGE02000690 contig	120	1	0.0348736	AAGE02000690	3441	Stegomyia aegypti	Aedes aegypti
AAGE02020575 contig	268	1	0.0347691	AAGE02020575	7708	Stegomyia aegypti	Aedes aegypti
AAGE02025881 contig	233	1	0.034652	AAGE02025881	6723	Stegomyia aegypti	Aedes aegypti
AAGE02033770 contig	235	1	0.0346046	AAGE02033770	6791	Stegomyia aegypti	Aedes aegypti
AAGE02016540 contig	234	1	0.0342356	AAGE02016540	6835	Stegomyia aegypti	Aedes aegypti
AAGE02026953 contig	273	1	0.034125	AAGE02026953	8000	Stegomyia aegypti	Aedes aegypti
AAGE02032174 contig	168	1	0.0340288	AAGE02032174	4936	Stegomyia aegypti	Aedes aegypti
AAGE02000897 contig	273	1	0.0339426	AAGE02000897	8042	Stegomyia aegypti	Aedes aegypti
AAGE02005905 contig	503	7	0.0338613	AAGE02005905	22917	Stegomyia aegypti	Aedes aegypti
AAGE02030350 contig	98	2	0.0338573	AAGE02030350	5788	Stegomyia aegypti	Aedes aegypti
AAGE02008449 contig	489	2	0.0337288	AAGE02008449	14494	Stegomyia aegypti	Aedes aegypti
AAGE02017927 contig	226	1	0.0336911	AAGE02017927	6703	Stegomyia aegypti	Aedes aegypti
AAGE02035857 contig	82	2	0.0335722	AAGE02035857	4885	Stegomyia aegypti	Aedes aegypti
AAGE02023363 contig	263	3	0.0335698	AAGE02023363	12124	Stegomyia aegypti	Aedes aegypti
AAGE02029763 contig	272	1	0.0335471	AAGE02029763	8108	Stegomyia aegypti	Aedes aegypti
AAGE02003350 contig	281	2	0.0332515	AAGE02003350	10586	Stegomyia aegypti	Aedes aegypti
AAGE02019350 contig	270	1	0.0331532	AAGE02019350	8144	Stegomyia aegypti	Aedes aegypti
AAGE02005644 contig	281	1	0.0330666	AAGE02005644	8497	Stegomyia aegypti	Aedes aegypti
AAGE02029561 contig	285	1	0.0330483	AAGE02029561	8654	Stegomyia aegypti	Aedes aegypti
AAGE02018037 contig	168	1	0.0329439	AAGE02018037	5221	Stegomyia aegypti	Aedes aegypti
AAGE02011300 contig	281	2	0.0328751	AAGE02011300	17095	Stegomyia aegypti	Aedes aegypti
AAGE02031104 contig	260	1	0.0328407	AAGE02031104	7916	Stegomyia aegypti	Aedes aegypti
AAGE02030337 contig	1040	7	0.0326985	AAGE02030337	35444	Stegomyia aegypti	Aedes aegypti
AAGE02033389 contig	255	1	0.0325048	AAGE02033389	7845	Stegomyia aegypti	Aedes aegypti
AAGE02028350 contig	315	2	0.0324669	AAGE02028350	9733	Stegomyia aegypti	Aedes aegypti
AAGE02012534 contig	426	2	0.0323656	AAGE02012534	13191	Stegomyia aegypti	Aedes aegypti
AAGE02034577 contig	231	1	0.0320539	AAGE02034577	7269	Stegomyia aegypti	Aedes aegypti
AAGE02007378 contig	54	2	0.0316092	AAGE02007378	3480	Stegomyia aegypti	Aedes aegypti
AAGE02001042 contig	516	6	0.0315155	AAGE02001042	35185	Stegomyia aegypti	Aedes aegypti
AAGE02013996 contig	273	1	0.0309981	AAGE02013996	8805	Stegomyia aegypti	Aedes aegypti
AAGE02016991 contig	177	1	0.0308255	AAGE02016991	5741	Stegomyia aegypti	Aedes aegypti
AAGE02005338 contig	345	5	0.0307501	AAGE02005338	14438	Stegomyia aegypti	Aedes aegypti
AAGE02025067 contig	179	1	0.0306507	AAGE02025067	5840	Stegomyia aegypti	Aedes aegypti
AAGE02028269 contig	249	1	0.0303659	AAGE02028269	8200	Stegomyia aegypti	Aedes aegypti
AAGE02005123 contig	266	2	0.0302273	AAGE02005123	17596	Stegomyia aegypti	Aedes aegypti
AAGE02014636 contig	33	2	0.0301783	AAGE02014636	2187	Stegomyia aegypti	Aedes aegypti
AAGE02028599 contig	206	1	0.0295722	AAGE02028599	6966	Stegomyia aegypti	Aedes aegypti
AAGE02016751 contig	151	1	0.0293445	AAGE02016751	5247	Stegomyia aegypti	Aedes aegypti
AAGE02033358 contig	253	1	0.029235	AAGE02033358	8653	Stegomyia aegypti	Aedes aegypti
AAGE02009034 contig	202	28	0.0287351	AAGE02009034	76452	Stegomyia aegypti	Aedes aegypti
AAGE02033181 contig	259	1	0.0286631	AAGE02033181	9036	Stegomyia aegypti	Aedes aegypti
AAGE02024395 contig	134	1	0.0284803	AAGE02024395	4705	Stegomyia aegypti	Aedes aegypti
AAGE02008252 contig	344	4	0.028142	AAGE02008252	13041	Stegomyia aegypti	Aedes aegypti
AAGE02028980 contig	130	1	0.0281385	AAGE02028980	4620	Stegomyia aegypti	Aedes aegypti
AAGE02004376 contig	271	1	0.0281079	AAGE02004376	9677	Stegomyia aegypti	Aedes aegypti
AAGE02029833 contig	255	2	0.0280837	AAGE02029833	18160	Stegomyia aegypti	Aedes aegypti
AAGE02016083 contig	201	1	0.0280751	AAGE02016083	7194	Stegomyia aegypti	Aedes aegypti
AAGE02004667 contig	627	3	0.0276236	AAGE02004667	22696	Stegomyia aegypti	Aedes aegypti
AAGE02033981 contig	270	1	0.0275342	AAGE02033981	9805	Stegomyia aegypti	Aedes aegypti
AAGE02004327 contig	244	1	0.0271048	AAGE02004327	9039	Stegomyia aegypti	Aedes aegypti
AAGE02003233 contig	473	3	0.0270486	AAGE02003233	17524	Stegomyia aegypti	Aedes aegypti
AAGE02015429 contig	323	1	0.0269575	AAGE02015429	12055	Stegomyia aegypti	Aedes aegypti
AAGE02031128 contig	114	1	0.0267041	AAGE02031128	4269	Stegomyia aegypti	Aedes aegypti
AAGE02021994 contig	1708	64	0.0265693	AAGE02021994	343068	Stegomyia aegypti	Aedes aegypti
AAGE02001310 contig	1516	10	0.0264722	AAGE02001310	93529	Stegomyia aegypti	Aedes aegypti
AAGE02017253 contig	143	3	0.0264394	AAGE02017253	16600	Stegomyia aegypti	Aedes aegypti
AAGE02008361 contig	528	4	0.0264012	AAGE02008361	20034	Stegomyia aegypti	Aedes aegypti
AAGE02017683 contig	514	2	0.0262889	AAGE02017683	19552	Stegomyia aegypti	Aedes aegypti
AAGE02009357 contig	238	1	0.0262868	AAGE02009357	9092	Stegomyia aegypti	Aedes aegypti
AAGE02007366 contig	284	4	0.0261878	AAGE02007366	15006	Stegomyia aegypti	Aedes aegypti
AAGE02018185 contig	180	4	0.0259686	AAGE02018185	9550	Stegomyia aegypti	Aedes aegypti
AAGE02035156 contig	157	1	0.0259333	AAGE02035156	6054	Stegomyia aegypti	Aedes aegypti
AAGE02021390 contig	271	1	0.0258974	AAGE02021390	10501	Stegomyia aegypti	Aedes aegypti
AAGE02011899 contig	276	1	0.0257837	AAGE02011899	10782	Stegomyia aegypti	Aedes aegypti
AAGE02029977 contig	343	4	0.0257419	AAGE02029977	19577	Stegomyia aegypti	Aedes aegypti
AAGE02030250 contig	277	1	0.0256719	AAGE02030250	10790	Stegomyia aegypti	Aedes aegypti
AAGE02001911 contig	326	2	0.0256108	AAGE02001911	12729	Stegomyia aegypti	Aedes aegypti
AAGE02012881 contig	230	1	0.0255185	AAGE02012881	9209	Stegomyia aegypti	Aedes aegypti
AAGE02002773 contig	286	1	0.0254426	AAGE02002773	11241	Stegomyia aegypti	Aedes aegypti
AAGE02009840 contig	589	5	0.02542	AAGE02009840	33984	Stegomyia aegypti	Aedes aegypti
AAGE02017122 contig	582	3	0.0253263	AAGE02017122	23135	Stegomyia aegypti	Aedes aegypti
AAGE02007887 contig	239	1	0.02515	AAGE02007887	9503	Stegomyia aegypti	Aedes aegypti
AAGE02019061 contig	155	1	0.0251419	AAGE02019061	6165	Stegomyia aegypti	Aedes aegypti
AAGE02012756 contig	242	1	0.0251118	AAGE02012756	9834	Stegomyia aegypti	Aedes aegypti
AAGE02007801 contig	267	1	0.0249766	AAGE02007801	10690	Stegomyia aegypti	Aedes aegypti
AAGE02031981 contig	280	1	0.0247481	AAGE02031981	11312	Stegomyia aegypti	Aedes aegypti
AAGE02003099 contig	243	1	0.0244614	AAGE02003099	9934	Stegomyia aegypti	Aedes aegypti
AAGE02019348 contig	1151	11	0.0243016	AAGE02019348	66003	Stegomyia aegypti	Aedes aegypti
AAGE02016560 contig	81	1	0.0239645	AAGE02016560	3380	Stegomyia aegypti	Aedes aegypti
AAGE02005676 contig	970	11	0.0239355	AAGE02005676	58949	Stegomyia aegypti	Aedes aegypti
AAGE02003644 contig	199	1	0.0238838	AAGE02003644	8331	Stegomyia aegypti	Aedes aegypti
AAGE02018940 contig	233	1	0.0237416	AAGE02018940	9814	Stegomyia aegypti	Aedes aegypti
AAGE02033942 contig	242	1	0.0236328	AAGE02033942	10238	Stegomyia aegypti	Aedes aegypti
AAGE02032396 contig	77	1	0.0235835	AAGE02032396	3265	Stegomyia aegypti	Aedes aegypti
AAGE02003863 contig	904	12	0.0235503	AAGE02003863	64922	Stegomyia aegypti	Aedes aegypti
AAGE02033197 contig	281	1	0.0234871	AAGE02033197	11964	Stegomyia aegypti	Aedes aegypti
AAGE02007167 contig	294	1	0.0232631	AAGE02007167	12681	Stegomyia aegypti	Aedes aegypti
AAGE02018828 contig	227	2	0.023232	AAGE02018828	19542	Stegomyia aegypti	Aedes aegypti
AAGE02017321 contig	231	2	0.0231898	AAGE02017321	20095	Stegomyia aegypti	Aedes aegypti
AAGE02029393 contig	267	1	0.0231134	AAGE02029393	11595	Stegomyia aegypti	Aedes aegypti
AAGE02028250 contig	172	1	0.0230452	AAGE02028250	7506	Stegomyia aegypti	Aedes aegypti
AAGE02031060 contig	266	3	0.0226729	AAGE02031060	25934	Stegomyia aegypti	Aedes aegypti
AAGE02030697 contig	144	1	0.0224684	AAGE02030697	6409	Stegomyia aegypti	Aedes aegypti
AAGE02001329 contig	104	1	0.0220526	AAGE02001329	4716	Stegomyia aegypti	Aedes aegypti
AAGE02015256 contig	272	1	0.0220481	AAGE02015256	12382	Stegomyia aegypti	Aedes aegypti
AAGE02021412 contig	248	1	0.0220347	AAGE02021412	11255	Stegomyia aegypti	Aedes aegypti
AAGE02008384 contig	2161	56	0.022025	AAGE02008384	398397	Stegomyia aegypti	Aedes aegypti
AAGE02030402 contig	177	1	0.0220231	AAGE02030402	8037	Stegomyia aegypti	Aedes aegypti
AAGE02033525 contig	300	1	0.0219956	AAGE02033525	13726	Stegomyia aegypti	Aedes aegypti
AAGE02007261 contig	298	1	0.0218695	AAGE02007261	13669	Stegomyia aegypti	Aedes aegypti
AAGE02004352 contig	346	3	0.0217558	AAGE02004352	28636	Stegomyia aegypti	Aedes aegypti
AAGE02002642 contig	286	1	0.0216131	AAGE02002642	13277	Stegomyia aegypti	Aedes aegypti
AAGE02011775 contig	242	1	0.0215821	AAGE02011775	11212	Stegomyia aegypti	Aedes aegypti
AAGE02023547 contig	481	2	0.021492	AAGE02023547	22426	Stegomyia aegypti	Aedes aegypti
AAGE02007554 contig	554	6	0.0211946	AAGE02007554	38642	Stegomyia aegypti	Aedes aegypti
AAGE02034597 contig	152	1	0.0211648	AAGE02034597	7227	Stegomyia aegypti	Aedes aegypti
AAGE02008038 contig	201	2	0.0211379	AAGE02008038	9509	Stegomyia aegypti	Aedes aegypti
AAGE02008567 contig	128	1	0.0211117	AAGE02008567	6063	Stegomyia aegypti	Aedes aegypti
AAGE02024849 contig	265	1	0.0208892	AAGE02024849	12685	Stegomyia aegypti	Aedes aegypti
AAGE02024612 contig	301	1	0.0208823	AAGE02024612	14460	Stegomyia aegypti	Aedes aegypti
AAGE02029225 contig	172	1	0.0205889	AAGE02029225	8350	Stegomyia aegypti	Aedes aegypti
AAGE02018127 contig	214	2	0.0205732	AAGE02018127	12492	Stegomyia aegypti	Aedes aegypti
AAGE02013547 contig	251	1	0.0205603	AAGE02013547	12208	Stegomyia aegypti	Aedes aegypti
AAGE02008160 contig	311	1	0.020464	AAGE02008160	15344	Stegomyia aegypti	Aedes aegypti
AAGE02001596 contig	273	1	0.0204341	AAGE02001596	13359	Stegomyia aegypti	Aedes aegypti
AAGE02030856 contig	261	1	0.0204002	AAGE02030856	12892	Stegomyia aegypti	Aedes aegypti
AAGE02024617 contig	158	1	0.0203007	AAGE02024617	7783	Stegomyia aegypti	Aedes aegypti
AAGE02032105 contig	240	1	0.0202874	AAGE02032105	11830	Stegomyia aegypti	Aedes aegypti
AAGE02021127 contig	238	1	0.020276	AAGE02021127	11738	Stegomyia aegypti	Aedes aegypti
AAGE02005187 contig	708	10	0.020186	AAGE02005187	82580	Stegomyia aegypti	Aedes aegypti
AAGE02007133 contig	406	3	0.0201207	AAGE02007133	28826	Stegomyia aegypti	Aedes aegypti
AAGE02007909 contig	151	1	0.0200159	AAGE02007909	7544	Stegomyia aegypti	Aedes aegypti
AAGE02004800 contig	284	1	0.0199053	AAGE02004800	14568	Stegomyia aegypti	Aedes aegypti
AAGE02028422 contig	245	1	0.0197916	AAGE02028422	12379	Stegomyia aegypti	Aedes aegypti
AAGE02008509 contig	238	1	0.0196773	AAGE02008509	12146	Stegomyia aegypti	Aedes aegypti
AAGE02003906 contig	384	4	0.0196759	AAGE02003906	23326	Stegomyia aegypti	Aedes aegypti
AAGE02005968 contig	722	6	0.019616	AAGE02005968	50775	Stegomyia aegypti	Aedes aegypti
AAGE02003280 contig	341	25	0.0195262	AAGE02003280	156908	Stegomyia aegypti	Aedes aegypti
AAGE02013559 contig	99	4	0.0195196	AAGE02013559	20441	Stegomyia aegypti	Aedes aegypti
AAGE02011830 contig	62	2	0.0194015	AAGE02011830	6082	Stegomyia aegypti	Aedes aegypti
AAGE02025625 contig	258	1	0.0192912	AAGE02025625	13374	Stegomyia aegypti	Aedes aegypti
AAGE02008598 contig	347	2	0.0190237	AAGE02008598	18292	Stegomyia aegypti	Aedes aegypti
AAGE02012750 contig	252	1	0.0190146	AAGE02012750	13252	Stegomyia aegypti	Aedes aegypti
AAGE02018823 contig	718	5	0.0189847	AAGE02018823	50725	Stegomyia aegypti	Aedes aegypti
AAGE02020414 contig	254	1	0.0189438	AAGE02020414	13672	Stegomyia aegypti	Aedes aegypti
AAGE02014799 contig	285	1	0.0189293	AAGE02014799	15055	Stegomyia aegypti	Aedes aegypti
AAGE02014510 contig	237	1	0.0188784	AAGE02014510	12605	Stegomyia aegypti	Aedes aegypti
AAGE02026104 contig	543	13	0.0188507	AAGE02026104	58034	Stegomyia aegypti	Aedes aegypti
AAGE02034728 contig	130	1	0.0188378	AAGE02034728	6901	Stegomyia aegypti	Aedes aegypti
AAGE02020618 contig	173	1	0.0187662	AAGE02020618	9272	Stegomyia aegypti	Aedes aegypti
AAGE02028153 contig	250	1	0.0187523	AAGE02028153	13382	Stegomyia aegypti	Aedes aegypti
AAGE02031148 contig	202	3	0.0186949	AAGE02031148	14175	Stegomyia aegypti	Aedes aegypti
AAGE02015739 contig	625	6	0.0186509	AAGE02015739	42679	Stegomyia aegypti	Aedes aegypti
AAGE02020540 contig	190	1	0.0185619	AAGE02020540	10234	Stegomyia aegypti	Aedes aegypti
AAGE02006617 contig	257	1	0.0183723	AAGE02006617	14314	Stegomyia aegypti	Aedes aegypti
AAGE02032944 contig	274	1	0.0183695	AAGE02032944	14916	Stegomyia aegypti	Aedes aegypti
AAGE02004671 contig	197	2	0.0183572	AAGE02004671	21463	Stegomyia aegypti	Aedes aegypti
AAGE02032398 contig	270	1	0.0183511	AAGE02032398	14713	Stegomyia aegypti	Aedes aegypti
AAGE02012884 contig	496	2	0.0183262	AAGE02012884	27436	Stegomyia aegypti	Aedes aegypti
AAGE02009220 contig	460	5	0.0182619	AAGE02009220	40192	Stegomyia aegypti	Aedes aegypti
AAGE02018831 contig	832	9	0.0182411	AAGE02018831	61672	Stegomyia aegypti	Aedes aegypti
AAGE02024884 contig	173	1	0.0182182	AAGE02024884	9495	Stegomyia aegypti	Aedes aegypti
AAGE02007227 contig	302	1	0.0181381	AAGE02007227	16650	Stegomyia aegypti	Aedes aegypti
AAGE02017112 contig	150	1	0.0180267	AAGE02017112	8321	Stegomyia aegypti	Aedes aegypti
AAGE02020155 contig	257	1	0.0180068	AAGE02020155	14439	Stegomyia aegypti	Aedes aegypti
AAGE02024282 contig	246	1	0.0179943	AAGE02024282	13671	Stegomyia aegypti	Aedes aegypti
AAGE02021155 contig	226	2	0.0179922	AAGE02021155	25122	Stegomyia aegypti	Aedes aegypti
AAGE02029635 contig	80	2	0.0173216	AAGE02029635	9237	Stegomyia aegypti	Aedes aegypti
AAGE02023722 contig	394	4	0.0173147	AAGE02023722	22813	Stegomyia aegypti	Aedes aegypti
AAGE02027977 contig	230	2	0.0173128	AAGE02027977	13283	Stegomyia aegypti	Aedes aegypti
AAGE02011298 contig	157	1	0.0172965	AAGE02011298	9076	Stegomyia aegypti	Aedes aegypti
AAGE02028876 contig	254	2	0.0171614	AAGE02028876	29950	Stegomyia aegypti	Aedes aegypti
AAGE02018090 contig	361	5	0.0171262	AAGE02018090	43849	Stegomyia aegypti	Aedes aegypti
AAGE02018632 contig	246	1	0.0171119	AAGE02018632	14376	Stegomyia aegypti	Aedes aegypti
AAGE02028410 contig	199	2	0.0170921	AAGE02028410	22759	Stegomyia aegypti	Aedes aegypti
AAGE02005806 contig	677	6	0.0170701	AAGE02005806	73696	Stegomyia aegypti	Aedes aegypti
AAGE02007798 contig	494	7	0.0170374	AAGE02007798	54938	Stegomyia aegypti	Aedes aegypti
AAGE02029779 contig	276	2	0.0169844	AAGE02029779	16368	Stegomyia aegypti	Aedes aegypti
AAGE02019390 contig	777	10	0.0169421	AAGE02019390	96208	Stegomyia aegypti	Aedes aegypti
AAGE02020711 contig	330	3	0.0169265	AAGE02020711	19496	Stegomyia aegypti	Aedes aegypti
AAGE02030016 contig	442	2	0.0168631	AAGE02030016	26211	Stegomyia aegypti	Aedes aegypti
AAGE02005675 contig	252	3	0.0167441	AAGE02005675	24546	Stegomyia aegypti	Aedes aegypti
AAGE02010909 contig	261	1	0.0166773	AAGE02010909	15650	Stegomyia aegypti	Aedes aegypti
AAGE02006982 contig	672	4	0.0166306	AAGE02006982	42512	Stegomyia aegypti	Aedes aegypti
AAGE02033982 contig	163	1	0.0166259	AAGE02033982	9804	Stegomyia aegypti	Aedes aegypti
AAGE02021134 contig	321	2	0.0165952	AAGE02021134	19343	Stegomyia aegypti	Aedes aegypti
AAGE02006606 contig	269	1	0.0165426	AAGE02006606	16260	Stegomyia aegypti	Aedes aegypti
AAGE02029959 contig	269	1	0.0165223	AAGE02029959	16281	Stegomyia aegypti	Aedes aegypti
AAGE02018822 contig	190	1	0.0165217	AAGE02018822	11499	Stegomyia aegypti	Aedes aegypti
AAGE02027213 contig	443	3	0.0164763	AAGE02027213	28101	Stegomyia aegypti	Aedes aegypti
AAGE02002968 contig	193	1	0.0164437	AAGE02002968	11736	Stegomyia aegypti	Aedes aegypti
AAGE02007237 contig	591	6	0.0163834	AAGE02007237	53894	Stegomyia aegypti	Aedes aegypti
AAGE02031014 contig	157	1	0.0163798	AAGE02031014	9583	Stegomyia aegypti	Aedes aegypti
AAGE02005645 contig	793	4	0.0163726	AAGE02005645	51851	Stegomyia aegypti	Aedes aegypti
AAGE02017407 contig	261	1	0.0163196	AAGE02017407	15991	Stegomyia aegypti	Aedes aegypti
AAGE02031571 contig	389	2	0.0162768	AAGE02031571	23899	Stegomyia aegypti	Aedes aegypti
AAGE02007054 contig	162	3	0.0162713	AAGE02007054	30603	Stegomyia aegypti	Aedes aegypti
AAGE02027586 contig	424	3	0.0162656	AAGE02027586	38609	Stegomyia aegypti	Aedes aegypti
AAGE02027075 contig	260	1	0.0161692	AAGE02027075	16080	Stegomyia aegypti	Aedes aegypti
AAGE02029976 contig	265	2	0.0160349	AAGE02029976	33047	Stegomyia aegypti	Aedes aegypti
AAGE02009219 contig	117	2	0.0159869	AAGE02009219	14637	Stegomyia aegypti	Aedes aegypti
AAGE02004734 contig	216	2	0.0159645	AAGE02004734	27057	Stegomyia aegypti	Aedes aegypti
AAGE02000189 contig	419	2	0.0159613	AAGE02000189	26251	Stegomyia aegypti	Aedes aegypti
AAGE02011228 contig	584	4	0.0158771	AAGE02011228	47175	Stegomyia aegypti	Aedes aegypti
AAGE02006966 contig	229	1	0.0158631	AAGE02006966	14435	Stegomyia aegypti	Aedes aegypti
AAGE02008766 contig	1111	7	0.0158209	AAGE02008766	70345	Stegomyia aegypti	Aedes aegypti
AAGE02022122 contig	352	3	0.0157277	AAGE02022122	38340	Stegomyia aegypti	Aedes aegypti
AAGE02011326 contig	525	3	0.0157268	AAGE02011326	33446	Stegomyia aegypti	Aedes aegypti
AAGE02009349 contig	273	1	0.0157032	AAGE02009349	17385	Stegomyia aegypti	Aedes aegypti
AAGE02012642 contig	316	2	0.015618	AAGE02012642	20231	Stegomyia aegypti	Aedes aegypti
AAGE02007228 contig	89	1	0.0155467	AAGE02007228	5789	Stegomyia aegypti	Aedes aegypti
AAGE02013057 contig	31	2	0.015535	AAGE02013057	3991	Stegomyia aegypti	Aedes aegypti
AAGE02011734 contig	491	2	0.0155296	AAGE02011734	31615	Stegomyia aegypti	Aedes aegypti
AAGE02001929 contig	64	2	0.0154384	AAGE02001929	8291	Stegomyia aegypti	Aedes aegypti
AAGE02013317 contig	211	2	0.0154263	AAGE02013317	18473	Stegomyia aegypti	Aedes aegypti
AAGE02011202 contig	255	2	0.015419	AAGE02011202	33076	Stegomyia aegypti	Aedes aegypti
AAGE02024483 contig	53	1	0.0153623	AAGE02024483	3450	Stegomyia aegypti	Aedes aegypti
AAGE02012311 contig	447	5	0.0153195	AAGE02012311	59532	Stegomyia aegypti	Aedes aegypti
AAGE02020596 contig	198	1	0.0152884	AAGE02020596	12949	Stegomyia aegypti	Aedes aegypti
AAGE02015167 contig	870	4	0.0152273	AAGE02015167	57200	Stegomyia aegypti	Aedes aegypti
AAGE02008254 contig	607	2	0.0152256	AAGE02008254	40059	Stegomyia aegypti	Aedes aegypti
AAGE02024784 contig	310	1	0.0152188	AAGE02024784	20500	Stegomyia aegypti	Aedes aegypti
AAGE02018614 contig	252	1	0.0151488	AAGE02018614	16635	Stegomyia aegypti	Aedes aegypti
AAGE02002595 contig	204	2	0.0150977	AAGE02002595	27024	Stegomyia aegypti	Aedes aegypti
AAGE02006931 contig	879	18	0.0150969	AAGE02006931	160080	Stegomyia aegypti	Aedes aegypti
AAGE02029624 contig	342	3	0.0150747	AAGE02029624	22687	Stegomyia aegypti	Aedes aegypti
AAGE02014979 contig	441	2	0.0150327	AAGE02014979	29336	Stegomyia aegypti	Aedes aegypti
AAGE02026226 contig	251	1	0.0149298	AAGE02026226	16812	Stegomyia aegypti	Aedes aegypti
AAGE02003865 contig	373	4	0.0148685	AAGE02003865	40419	Stegomyia aegypti	Aedes aegypti
AAGE02011860 contig	273	1	0.0148501	AAGE02011860	18451	Stegomyia aegypti	Aedes aegypti
AAGE02033818 contig	166	1	0.0148161	AAGE02033818	11204	Stegomyia aegypti	Aedes aegypti
AAGE02000273 contig	245	2	0.0148123	AAGE02000273	32877	Stegomyia aegypti	Aedes aegypti
AAGE02004686 contig	444	4	0.0148093	AAGE02004686	33289	Stegomyia aegypti	Aedes aegypti
AAGE02013728 contig	267	1	0.0147791	AAGE02013728	18066	Stegomyia aegypti	Aedes aegypti
AAGE02018088 contig	70	2	0.0147093	AAGE02018088	8702	Stegomyia aegypti	Aedes aegypti
AAGE02015023 contig	341	2	0.0146989	AAGE02015023	23267	Stegomyia aegypti	Aedes aegypti
AAGE02020693 contig	263	1	0.0146583	AAGE02020693	17942	Stegomyia aegypti	Aedes aegypti
AAGE02001989 contig	302	3	0.0146574	AAGE02001989	37592	Stegomyia aegypti	Aedes aegypti
AAGE02006145 contig	225	18	0.0146024	AAGE02006145	117852	Stegomyia aegypti	Aedes aegypti
AAGE02016344 contig	462	2	0.0145763	AAGE02016344	36772	Stegomyia aegypti	Aedes aegypti
AAGE02018767 contig	177	1	0.0145356	AAGE02018767	12177	Stegomyia aegypti	Aedes aegypti
AAGE02005855 contig	312	1	0.0144486	AAGE02005855	21662	Stegomyia aegypti	Aedes aegypti
AAGE02009387 contig	84	10	0.0143507	AAGE02009387	41321	Stegomyia aegypti	Aedes aegypti
AAGE02004358 contig	425	4	0.0143087	AAGE02004358	59543	Stegomyia aegypti	Aedes aegypti
AAGE02023316 contig	517	3	0.0143075	AAGE02023316	55634	Stegomyia aegypti	Aedes aegypti
AAGE02003080 contig	499	3	0.014307	AAGE02003080	34877	Stegomyia aegypti	Aedes aegypti
AAGE02002784 contig	1125	9	0.014279	AAGE02002784	110371	Stegomyia aegypti	Aedes aegypti
AAGE02025908 contig	241	1	0.014174	AAGE02025908	17003	Stegomyia aegypti	Aedes aegypti
AAGE02024640 contig	566	6	0.0141266	AAGE02024640	72204	Stegomyia aegypti	Aedes aegypti
AAGE02002165 contig	1631	14	0.0140077	AAGE02002165	160407	Stegomyia aegypti	Aedes aegypti
AAGE02033063 contig	211	1	0.0139883	AAGE02033063	15227	Stegomyia aegypti	Aedes aegypti
AAGE02002151 contig	187	1	0.013974	AAGE02002151	13380	Stegomyia aegypti	Aedes aegypti
AAGE02029214 contig	1129	7	0.0139643	AAGE02029214	102759	Stegomyia aegypti	Aedes aegypti
AAGE02025376 contig	109	1	0.0139084	AAGE02025376	7836	Stegomyia aegypti	Aedes aegypti
AAGE02017492 contig	1268	13	0.01386	AAGE02017492	144080	Stegomyia aegypti	Aedes aegypti
AAGE02031138 contig	40	1	0.0138373	AAGE02031138	2963	Stegomyia aegypti	Aedes aegypti
AAGE02000359 contig	279	1	0.0138249	AAGE02000359	20180	Stegomyia aegypti	Aedes aegypti
AAGE02018454 contig	255	1	0.0137883	AAGE02018454	18494	Stegomyia aegypti	Aedes aegypti
AAGE02018704 contig	227	2	0.0137573	AAGE02018704	16573	Stegomyia aegypti	Aedes aegypti
AAGE02000635 contig	360	4	0.0137213	AAGE02000635	30245	Stegomyia aegypti	Aedes aegypti
AAGE02022397 contig	188	1	0.0137106	AAGE02022397	13784	Stegomyia aegypti	Aedes aegypti
AAGE02007700 contig	272	2	0.0136607	AAGE02007700	40114	Stegomyia aegypti	Aedes aegypti
AAGE02029049 contig	158	3	0.0136512	AAGE02029049	14429	Stegomyia aegypti	Aedes aegypti
AAGE02035594 contig	73	1	0.0136423	AAGE02035594	5351	Stegomyia aegypti	Aedes aegypti
AAGE02035455 contig	76	1	0.0136323	AAGE02035455	5575	Stegomyia aegypti	Aedes aegypti
AAGE02020113 contig	232	1	0.0136058	AAGE02020113	17125	Stegomyia aegypti	Aedes aegypti
AAGE02018311 contig	308	6	0.0135931	AAGE02018311	53994	Stegomyia aegypti	Aedes aegypti
AAGE02011529 contig	680	3	0.0135465	AAGE02011529	57283	Stegomyia aegypti	Aedes aegypti
AAGE02021568 contig	186	7	0.0135368	AAGE02021568	30805	Stegomyia aegypti	Aedes aegypti
AAGE02007252 contig	145	1	0.0135198	AAGE02007252	10725	Stegomyia aegypti	Aedes aegypti
AAGE02001377 contig	135	2	0.0134864	AAGE02001377	15423	Stegomyia aegypti	Aedes aegypti
AAGE02009563 contig	253	1	0.0134324	AAGE02009563	18834	Stegomyia aegypti	Aedes aegypti
AAGE02007060 contig	437	4	0.0133447	AAGE02007060	32970	Stegomyia aegypti	Aedes aegypti
AAGE02007831 contig	169	1	0.0133155	AAGE02007831	12692	Stegomyia aegypti	Aedes aegypti
AAGE02035522 contig	72	1	0.0131483	AAGE02035522	5475	Stegomyia aegypti	Aedes aegypti
AAGE02007011 contig	667	3	0.0131277	AAGE02007011	50959	Stegomyia aegypti	Aedes aegypti
AAGE02019474 contig	172	2	0.0130883	AAGE02019474	26283	Stegomyia aegypti	Aedes aegypti
AAGE02021618 contig	225	1	0.0130734	AAGE02021618	17286	Stegomyia aegypti	Aedes aegypti
AAGE02025327 contig	204	1	0.0130627	AAGE02025327	15617	Stegomyia aegypti	Aedes aegypti
AAGE02028355 contig	222	1	0.0130458	AAGE02028355	17017	Stegomyia aegypti	Aedes aegypti
AAGE02006684 contig	270	1	0.0130408	AAGE02006684	20781	Stegomyia aegypti	Aedes aegypti
AAGE02033178 contig	242	1	0.0129891	AAGE02033178	18704	Stegomyia aegypti	Aedes aegypti
AAGE02018155 contig	175	1	0.0129726	AAGE02018155	13490	Stegomyia aegypti	Aedes aegypti
AAGE02020252 contig	875	6	0.0129705	AAGE02020252	77098	Stegomyia aegypti	Aedes aegypti
AAGE02018171 contig	280	1	0.0129326	AAGE02018171	21723	Stegomyia aegypti	Aedes aegypti
AAGE02003545 contig	239	1	0.0128543	AAGE02003545	18593	Stegomyia aegypti	Aedes aegypti
AAGE02010736 contig	414	2	0.0128154	AAGE02010736	32305	Stegomyia aegypti	Aedes aegypti
AAGE02031608 contig	159	1	0.0127958	AAGE02031608	12424	Stegomyia aegypti	Aedes aegypti
AAGE02028998 contig	276	1	0.0127957	AAGE02028998	21726	Stegomyia aegypti	Aedes aegypti
AAGE02029626 contig	241	1	0.0127946	AAGE02029626	18836	Stegomyia aegypti	Aedes aegypti
AAGE02024644 contig	252	1	0.0127757	AAGE02024644	19725	Stegomyia aegypti	Aedes aegypti
AAGE02020870 contig	410	3	0.012775	AAGE02020870	32094	Stegomyia aegypti	Aedes aegypti
AAGE02002159 contig	281	2	0.0127299	AAGE02002159	22074	Stegomyia aegypti	Aedes aegypti
AAGE02020625 contig	1483	11	0.0127289	AAGE02020625	179198	Stegomyia aegypti	Aedes aegypti
AAGE02030243 contig	234	1	0.0127044	AAGE02030243	18654	Stegomyia aegypti	Aedes aegypti
AAGE02012519 contig	68	5	0.0126892	AAGE02012519	13081	Stegomyia aegypti	Aedes aegypti
AAGE02029562 contig	158	1	0.0126804	AAGE02029562	12533	Stegomyia aegypti	Aedes aegypti
AAGE02014520 contig	229	3	0.0126436	AAGE02014520	54336	Stegomyia aegypti	Aedes aegypti
AAGE02024619 contig	104	2	0.0125878	AAGE02024619	8262	Stegomyia aegypti	Aedes aegypti
AAGE02017988 contig	1117	11	0.0125679	AAGE02017988	133276	Stegomyia aegypti	Aedes aegypti
AAGE02022562 contig	750	13	0.012547	AAGE02022562	101051	Stegomyia aegypti	Aedes aegypti
AAGE02009630 contig	714	57	0.0125309	AAGE02009630	374190	Stegomyia aegypti	Aedes aegypti
AAGE02017124 contig	246	1	0.0125229	AAGE02017124	19644	Stegomyia aegypti	Aedes aegypti
AAGE02012227 contig	277	1	0.0125028	AAGE02012227	22155	Stegomyia aegypti	Aedes aegypti
AAGE02000847 contig	235	1	0.0124854	AAGE02000847	18821	Stegomyia aegypti	Aedes aegypti
AAGE02000536 contig	812	4	0.0124309	AAGE02000536	87196	Stegomyia aegypti	Aedes aegypti
AAGE02029717 contig	272	1	0.0124246	AAGE02029717	21892	Stegomyia aegypti	Aedes aegypti
AAGE02028190 contig	298	1	0.0123877	AAGE02028190	24377	Stegomyia aegypti	Aedes aegypti
AAGE02007422 contig	44	1	0.0123355	AAGE02007422	3647	Stegomyia aegypti	Aedes aegypti
AAGE02012817 contig	633	6	0.0123102	AAGE02012817	78957	Stegomyia aegypti	Aedes aegypti
AAGE02030163 contig	142	1	0.0122837	AAGE02030163	11560	Stegomyia aegypti	Aedes aegypti
AAGE02018854 contig	295	2	0.012258	AAGE02018854	24066	Stegomyia aegypti	Aedes aegypti
AAGE02029564 contig	163	1	0.0122418	AAGE02029564	13315	Stegomyia aegypti	Aedes aegypti
AAGE02033322 contig	203	1	0.0122274	AAGE02033322	16601	Stegomyia aegypti	Aedes aegypti
AAGE02027487 contig	240	1	0.0122267	AAGE02027487	19709	Stegomyia aegypti	Aedes aegypti
AAGE02003079 contig	270	2	0.0122081	AAGE02003079	44232	Stegomyia aegypti	Aedes aegypti
AAGE02017091 contig	418	3	0.0122062	AAGE02017091	55218	Stegomyia aegypti	Aedes aegypti
AAGE02020623 contig	236	1	0.0121976	AAGE02020623	19590	Stegomyia aegypti	Aedes aegypti
AAGE02028402 contig	166	1	0.0121738	AAGE02028402	13718	Stegomyia aegypti	Aedes aegypti
AAGE02026303 contig	176	1	0.0121455	AAGE02026303	14491	Stegomyia aegypti	Aedes aegypti
AAGE02026671 contig	149	1	0.0121326	AAGE02026671	12281	Stegomyia aegypti	Aedes aegypti
AAGE02010800 contig	163	1	0.0121199	AAGE02010800	13449	Stegomyia aegypti	Aedes aegypti
AAGE02020445 contig	247	1	0.0120978	AAGE02020445	20417	Stegomyia aegypti	Aedes aegypti
AAGE02014996 contig	190	3	0.0120852	AAGE02014996	47165	Stegomyia aegypti	Aedes aegypti
AAGE02001421 contig	260	1	0.0120823	AAGE02001421	21518	Stegomyia aegypti	Aedes aegypti
AAGE02016572 contig	172	1	0.0120812	AAGE02016572	14237	Stegomyia aegypti	Aedes aegypti
AAGE02005906 contig	101	1	0.0120539	AAGE02005906	8373	Stegomyia aegypti	Aedes aegypti
AAGE02012766 contig	117	1	0.012047	AAGE02012766	9712	Stegomyia aegypti	Aedes aegypti
AAGE02030884 contig	72	1	0.0120361	AAGE02030884	5982	Stegomyia aegypti	Aedes aegypti
AAGE02003932 contig	279	1	0.012001	AAGE02003932	23248	Stegomyia aegypti	Aedes aegypti
AAGE02019490 contig	263	1	0.0119829	AAGE02019490	21948	Stegomyia aegypti	Aedes aegypti
AAGE02012361 contig	57	2	0.0119672	AAGE02012361	9526	Stegomyia aegypti	Aedes aegypti
AAGE02010812 contig	145	1	0.0119548	AAGE02010812	12129	Stegomyia aegypti	Aedes aegypti
AAGE02023568 contig	52	2	0.0118871	AAGE02023568	8749	Stegomyia aegypti	Aedes aegypti
AAGE02011436 contig	153	1	0.0118229	AAGE02011436	12941	Stegomyia aegypti	Aedes aegypti
AAGE02007793 contig	278	1	0.0118155	AAGE02007793	23608	Stegomyia aegypti	Aedes aegypti
AAGE02020082 contig	269	3	0.0117992	AAGE02020082	68225	Stegomyia aegypti	Aedes aegypti
AAGE02028346 contig	211	1	0.0117844	AAGE02028346	17903	Stegomyia aegypti	Aedes aegypti
AAGE02015579 contig	707	6	0.0116286	AAGE02015579	65011	Stegomyia aegypti	Aedes aegypti
AAGE02020089 contig	257	1	0.0116032	AAGE02020089	22149	Stegomyia aegypti	Aedes aegypti
AAGE02007551 contig	371	2	0.0115553	AAGE02007551	32193	Stegomyia aegypti	Aedes aegypti
AAGE02015114 contig	319	2	0.0115488	AAGE02015114	27622	Stegomyia aegypti	Aedes aegypti
AAGE02013421 contig	228	6	0.0115167	AAGE02013421	40983	Stegomyia aegypti	Aedes aegypti
AAGE02019649 contig	150	1	0.011496	AAGE02019649	13048	Stegomyia aegypti	Aedes aegypti
AAGE02012769 contig	63	1	0.0114733	AAGE02012769	5491	Stegomyia aegypti	Aedes aegypti
AAGE02034419 contig	89	1	0.0114646	AAGE02034419	7763	Stegomyia aegypti	Aedes aegypti
AAGE02005926 contig	453	7	0.0114405	AAGE02005926	58564	Stegomyia aegypti	Aedes aegypti
AAGE02008485 contig	635	6	0.0113764	AAGE02008485	69266	Stegomyia aegypti	Aedes aegypti
AAGE02015004 contig	514	2	0.0113689	AAGE02015004	45211	Stegomyia aegypti	Aedes aegypti
AAGE02019514 contig	269	1	0.0113555	AAGE02019514	23689	Stegomyia aegypti	Aedes aegypti
AAGE02019297 contig	193	1	0.0113285	AAGE02019297	17125	Stegomyia aegypti	Aedes aegypti
AAGE02023109 contig	247	4	0.0113267	AAGE02023109	43348	Stegomyia aegypti	Aedes aegypti
AAGE02013428 contig	266	1	0.0113078	AAGE02013428	23610	Stegomyia aegypti	Aedes aegypti
AAGE02031461 contig	244	1	0.0113013	AAGE02031461	21679	Stegomyia aegypti	Aedes aegypti
AAGE02012546 contig	244	1	0.0112608	AAGE02012546	21668	Stegomyia aegypti	Aedes aegypti
AAGE02018551 contig	186	1	0.0112244	AAGE02018551	16571	Stegomyia aegypti	Aedes aegypti
AAGE02008198 contig	273	1	0.011206	AAGE02008198	24362	Stegomyia aegypti	Aedes aegypti
AAGE02005485 contig	67	1	0.0111797	AAGE02005485	5992	Stegomyia aegypti	Aedes aegypti
AAGE02020317 contig	195	1	0.0111537	AAGE02020317	17483	Stegomyia aegypti	Aedes aegypti
AAGE02013995 contig	143	1	0.0111423	AAGE02013995	12833	Stegomyia aegypti	Aedes aegypti
AAGE02006518 contig	142	1	0.0111333	AAGE02006518	13024	Stegomyia aegypti	Aedes aegypti
AAGE02002050 contig	1187	8	0.0111192	AAGE02002050	106931	Stegomyia aegypti	Aedes aegypti
AAGE02001542 contig	206	1	0.0110695	AAGE02001542	18700	Stegomyia aegypti	Aedes aegypti
AAGE02024398 contig	209	1	0.0110541	AAGE02024398	18907	Stegomyia aegypti	Aedes aegypti
AAGE02021286 contig	199	1	0.0110211	AAGE02021286	18144	Stegomyia aegypti	Aedes aegypti
AAGE02017353 contig	238	1	0.0110165	AAGE02017353	21604	Stegomyia aegypti	Aedes aegypti
AAGE02009425 contig	506	2	0.0109864	AAGE02009425	46057	Stegomyia aegypti	Aedes aegypti
AAGE02000211 contig	270	1	0.0109729	AAGE02000211	24606	Stegomyia aegypti	Aedes aegypti
AAGE02020084 contig	257	1	0.010966	AAGE02020084	23436	Stegomyia aegypti	Aedes aegypti
AAGE02000898 contig	37	5	0.0109467	AAGE02000898	16900	Stegomyia aegypti	Aedes aegypti
AAGE02013964 contig	306	1	0.0109352	AAGE02013964	27982	Stegomyia aegypti	Aedes aegypti
AAGE02022738 contig	777	7	0.0109138	AAGE02022738	97308	Stegomyia aegypti	Aedes aegypti
AAGE02013426 contig	182	2	0.0109113	AAGE02013426	33357	Stegomyia aegypti	Aedes aegypti
AAGE02007367 contig	493	5	0.0108977	AAGE02007367	92403	Stegomyia aegypti	Aedes aegypti
AAGE02021307 contig	286	3	0.0107986	AAGE02021307	26485	Stegomyia aegypti	Aedes aegypti
AAGE02007601 contig	117	1	0.0107874	AAGE02007601	10846	Stegomyia aegypti	Aedes aegypti
AAGE02014478 contig	279	1	0.010785	AAGE02014478	25962	Stegomyia aegypti	Aedes aegypti
AAGE02013404 contig	1483	9	0.0107708	AAGE02013404	141586	Stegomyia aegypti	Aedes aegypti
AAGE02014259 contig	478	3	0.0107607	AAGE02014259	44421	Stegomyia aegypti	Aedes aegypti
AAGE02006834 contig	372	3	0.0107592	AAGE02006834	34575	Stegomyia aegypti	Aedes aegypti
AAGE02004856 contig	156	1	0.010746	AAGE02004856	14517	Stegomyia aegypti	Aedes aegypti
AAGE02016872 contig	81	1	0.0107429	AAGE02016872	7726	Stegomyia aegypti	Aedes aegypti
AAGE02015351 contig	257	1	0.0107406	AAGE02015351	23928	Stegomyia aegypti	Aedes aegypti
AAGE02029711 contig	87	1	0.0107315	AAGE02029711	8107	Stegomyia aegypti	Aedes aegypti
AAGE02001960 contig	221	1	0.0107146	AAGE02001960	20626	Stegomyia aegypti	Aedes aegypti
AAGE02001962 contig	257	1	0.010709	AAGE02001962	24368	Stegomyia aegypti	Aedes aegypti
AAGE02015372 contig	293	2	0.0106981	AAGE02015372	27388	Stegomyia aegypti	Aedes aegypti
AAGE02001506 contig	265	1	0.0106782	AAGE02001506	24814	Stegomyia aegypti	Aedes aegypti
AAGE02001615 contig	303	2	0.0106489	AAGE02001615	57095	Stegomyia aegypti	Aedes aegypti
AAGE02001610 contig	953	6	0.0106435	AAGE02001610	113964	Stegomyia aegypti	Aedes aegypti
AAGE02031778 contig	258	1	0.0106308	AAGE02031778	24269	Stegomyia aegypti	Aedes aegypti
AAGE02013402 contig	262	3	0.0106045	AAGE02013402	32722	Stegomyia aegypti	Aedes aegypti
AAGE02015043 contig	317	3	0.0106008	AAGE02015043	48487	Stegomyia aegypti	Aedes aegypti
AAGE02009828 contig	233	1	0.0105969	AAGE02009828	22077	Stegomyia aegypti	Aedes aegypti
AAGE02016096 contig	276	2	0.0105855	AAGE02016096	52146	Stegomyia aegypti	Aedes aegypti
AAGE02011788 contig	263	1	0.010531	AAGE02011788	24974	Stegomyia aegypti	Aedes aegypti
AAGE02013255 contig	1243	14	0.0105277	AAGE02013255	234043	Stegomyia aegypti	Aedes aegypti
AAGE02001208 contig	518	4	0.0105149	AAGE02001208	66188	Stegomyia aegypti	Aedes aegypti
AAGE02008611 contig	115	3	0.0104931	AAGE02008611	16485	Stegomyia aegypti	Aedes aegypti
AAGE02008492 contig	255	1	0.0104879	AAGE02008492	24409	Stegomyia aegypti	Aedes aegypti
AAGE02030377 contig	256	1	0.0103936	AAGE02030377	24817	Stegomyia aegypti	Aedes aegypti
AAGE02013131 contig	274	3	0.0103752	AAGE02013131	80377	Stegomyia aegypti	Aedes aegypti
AAGE02023449 contig	433	3	0.0103611	AAGE02023449	41791	Stegomyia aegypti	Aedes aegypti
AAGE02020261 contig	449	7	0.0103585	AAGE02020261	83407	Stegomyia aegypti	Aedes aegypti
AAGE02020464 contig	181	1	0.0103306	AAGE02020464	17906	Stegomyia aegypti	Aedes aegypti
AAGE02030484 contig	350	2	0.0103263	AAGE02030484	33991	Stegomyia aegypti	Aedes aegypti
AAGE02021226 contig	266	1	0.0103109	AAGE02021226	25798	Stegomyia aegypti	Aedes aegypti
AAGE02024390 contig	394	3	0.0103036	AAGE02024390	52603	Stegomyia aegypti	Aedes aegypti
AAGE02001074 contig	263	2	0.0102996	AAGE02001074	51070	Stegomyia aegypti	Aedes aegypti
AAGE02017186 contig	238	1	0.0102941	AAGE02017186	23119	Stegomyia aegypti	Aedes aegypti
AAGE02001927 contig	80	2	0.0102881	AAGE02001927	7776	Stegomyia aegypti	Aedes aegypti
AAGE02008762 contig	108	2	0.0102759	AAGE02008762	21020	Stegomyia aegypti	Aedes aegypti
AAGE02007141 contig	283	1	0.0102715	AAGE02007141	27551	Stegomyia aegypti	Aedes aegypti
AAGE02019489 contig	193	1	0.01026	AAGE02019489	18811	Stegomyia aegypti	Aedes aegypti
AAGE02012407 contig	127	2	0.0102382	AAGE02012407	24809	Stegomyia aegypti	Aedes aegypti
AAGE02025019 contig	546	9	0.0102039	AAGE02025019	108781	Stegomyia aegypti	Aedes aegypti
AAGE02027305 contig	273	1	0.0101999	AAGE02027305	26863	Stegomyia aegypti	Aedes aegypti
AAGE02008169 contig	331	1	0.0101751	AAGE02008169	32722	Stegomyia aegypti	Aedes aegypti
AAGE02023441 contig	240	1	0.0100972	AAGE02023441	23769	Stegomyia aegypti	Aedes aegypti
AAGE02000087 contig	250	1	0.0100365	AAGE02000087	24909	Stegomyia aegypti	Aedes aegypti
AAGE02010829 contig	189	1	0.00998837	AAGE02010829	18922	Stegomyia aegypti	Aedes aegypti
AAGE02028134 contig	276	1	0.00998481	AAGE02028134	27639	Stegomyia aegypti	Aedes aegypti
AAGE02006131 contig	533	8	0.00995767	AAGE02006131	53627	Stegomyia aegypti	Aedes aegypti
AAGE02030940 contig	307	1	0.00995186	AAGE02030940	30949	Stegomyia aegypti	Aedes aegypti
AAGE02020329 contig	200	1	0.00991606	AAGE02020329	20370	Stegomyia aegypti	Aedes aegypti
AAGE02017324 contig	256	1	0.00989831	AAGE02017324	25863	Stegomyia aegypti	Aedes aegypti
AAGE02021419 contig	521	2	0.00988955	AAGE02021419	52783	Stegomyia aegypti	Aedes aegypti
AAGE02020227 contig	239	2	0.00988279	AAGE02020227	48973	Stegomyia aegypti	Aedes aegypti
AAGE02031619 contig	445	3	0.00986741	AAGE02031619	45400	Stegomyia aegypti	Aedes aegypti
AAGE02003902 contig	150	1	0.0098561	AAGE02003902	15219	Stegomyia aegypti	Aedes aegypti
AAGE02023767 contig	286	3	0.00984238	AAGE02023767	29058	Stegomyia aegypti	Aedes aegypti
AAGE02001678 contig	169	1	0.0098416	AAGE02001678	17172	Stegomyia aegypti	Aedes aegypti
AAGE02034284 contig	81	1	0.00983607	AAGE02034284	8235	Stegomyia aegypti	Aedes aegypti
AAGE02022294 contig	233	1	0.0097998	AAGE02022294	23776	Stegomyia aegypti	Aedes aegypti
AAGE02031625 contig	433	3	0.00979769	AAGE02031625	61341	Stegomyia aegypti	Aedes aegypti
AAGE02015800 contig	521	6	0.00973627	AAGE02015800	141428	Stegomyia aegypti	Aedes aegypti
AAGE02017113 contig	400	2	0.00973283	AAGE02017113	41098	Stegomyia aegypti	Aedes aegypti
AAGE02027489 contig	261	1	0.00972574	AAGE02027489	26836	Stegomyia aegypti	Aedes aegypti
AAGE02016925 contig	288	1	0.00972053	AAGE02016925	29628	Stegomyia aegypti	Aedes aegypti
AAGE02033397 contig	148	1	0.00971384	AAGE02033397	15236	Stegomyia aegypti	Aedes aegypti
AAGE02017040 contig	251	1	0.00970498	AAGE02017040	25862	Stegomyia aegypti	Aedes aegypti
AAGE02000645 contig	997	7	0.00968949	AAGE02000645	113009	Stegomyia aegypti	Aedes aegypti
AAGE02014877 contig	138	2	0.00964731	AAGE02014877	28609	Stegomyia aegypti	Aedes aegypti
AAGE02021156 contig	864	8	0.00961316	AAGE02021156	168722	Stegomyia aegypti	Aedes aegypti
AAGE02025745 contig	56	1	0.0096089	AAGE02025745	5932	Stegomyia aegypti	Aedes aegypti
AAGE02005488 contig	223	1	0.00960172	AAGE02005488	23225	Stegomyia aegypti	Aedes aegypti
AAGE02030090 contig	215	1	0.00958239	AAGE02030090	22437	Stegomyia aegypti	Aedes aegypti
AAGE02008238 contig	238	1	0.00957323	AAGE02008238	24861	Stegomyia aegypti	Aedes aegypti
AAGE02034822 contig	62	1	0.00954227	AAGE02034822	6707	Stegomyia aegypti	Aedes aegypti
AAGE02022907 contig	411	2	0.00950108	AAGE02022907	43572	Stegomyia aegypti	Aedes aegypti
AAGE02028826 contig	263	1	0.00945728	AAGE02028826	27915	Stegomyia aegypti	Aedes aegypti
AAGE02008233 contig	217	2	0.00945184	AAGE02008233	45917	Stegomyia aegypti	Aedes aegypti
AAGE02000213 contig	101	1	0.00942089	AAGE02000213	10827	Stegomyia aegypti	Aedes aegypti
AAGE02033238 contig	167	1	0.00941269	AAGE02033238	17742	Stegomyia aegypti	Aedes aegypti
AAGE02035207 contig	56	1	0.00940702	AAGE02035207	5953	Stegomyia aegypti	Aedes aegypti
AAGE02005762 contig	145	2	0.00939789	AAGE02005762	15429	Stegomyia aegypti	Aedes aegypti
AAGE02011405 contig	151	1	0.00939756	AAGE02011405	16068	Stegomyia aegypti	Aedes aegypti
AAGE02014006 contig	167	1	0.0093931	AAGE02014006	17779	Stegomyia aegypti	Aedes aegypti
AAGE02006364 contig	432	3	0.00935693	AAGE02006364	46169	Stegomyia aegypti	Aedes aegypti
AAGE02020663 contig	75	1	0.00934579	AAGE02020663	8025	Stegomyia aegypti	Aedes aegypti
AAGE02018593 contig	207	1	0.00930965	AAGE02018593	22235	Stegomyia aegypti	Aedes aegypti
AAGE02032458 contig	148	2	0.00928696	AAGE02032458	16044	Stegomyia aegypti	Aedes aegypti
AAGE02009209 contig	1060	7	0.00925682	AAGE02009209	167227	Stegomyia aegypti	Aedes aegypti
AAGE02003473 contig	241	1	0.00925144	AAGE02003473	26050	Stegomyia aegypti	Aedes aegypti
AAGE02012537 contig	130	1	0.00924806	AAGE02012537	14055	Stegomyia aegypti	Aedes aegypti
AAGE02023438 contig	283	1	0.00924595	AAGE02023438	30605	Stegomyia aegypti	Aedes aegypti
AAGE02014696 contig	136	1	0.00922284	AAGE02014696	14746	Stegomyia aegypti	Aedes aegypti
AAGE02025186 contig	522	3	0.00922131	AAGE02025186	56608	Stegomyia aegypti	Aedes aegypti
AAGE02004299 contig	182	1	0.00921286	AAGE02004299	19755	Stegomyia aegypti	Aedes aegypti
AAGE02017560 contig	235	1	0.00919441	AAGE02017560	25559	Stegomyia aegypti	Aedes aegypti
AAGE02025307 contig	1117	13	0.00917266	AAGE02025307	183042	Stegomyia aegypti	Aedes aegypti
AAGE02018552 contig	247	1	0.00902877	AAGE02018552	27357	Stegomyia aegypti	Aedes aegypti
AAGE02005862 contig	77	1	0.00902273	AAGE02005862	8534	Stegomyia aegypti	Aedes aegypti
AAGE02024327 contig	176	3	0.00901655	AAGE02024327	58559	Stegomyia aegypti	Aedes aegypti
AAGE02018184 contig	277	1	0.0090093	AAGE02018184	30739	Stegomyia aegypti	Aedes aegypti
AAGE02004714 contig	266	1	0.00900539	AAGE02004714	29869	Stegomyia aegypti	Aedes aegypti
AAGE02004621 contig	162	1	0.0090045	AAGE02004621	17991	Stegomyia aegypti	Aedes aegypti
AAGE02023154 contig	137	2	0.00899865	AAGE02023154	30449	Stegomyia aegypti	Aedes aegypti
AAGE02013738 contig	269	1	0.00899605	AAGE02013738	29902	Stegomyia aegypti	Aedes aegypti
AAGE02002858 contig	458	13	0.00898822	AAGE02002858	128278	Stegomyia aegypti	Aedes aegypti
AAGE02013781 contig	215	1	0.00897718	AAGE02013781	24061	Stegomyia aegypti	Aedes aegypti
AAGE02032804 contig	249	1	0.0089504	AAGE02032804	27820	Stegomyia aegypti	Aedes aegypti
AAGE02016356 contig	168	2	0.00894161	AAGE02016356	28070	Stegomyia aegypti	Aedes aegypti
AAGE02007354 contig	127	1	0.00893926	AAGE02007354	14207	Stegomyia aegypti	Aedes aegypti
AAGE02028206 contig	190	1	0.00887353	AAGE02028206	21411	Stegomyia aegypti	Aedes aegypti
AAGE02016826 contig	201	1	0.00886869	AAGE02016826	22664	Stegomyia aegypti	Aedes aegypti
AAGE02025780 contig	1047	9	0.00882957	AAGE02025780	142588	Stegomyia aegypti	Aedes aegypti
AAGE02017569 contig	232	1	0.00881693	AAGE02017569	26312	Stegomyia aegypti	Aedes aegypti
AAGE02009156 contig	419	5	0.00880189	AAGE02009156	47716	Stegomyia aegypti	Aedes aegypti
AAGE02017916 contig	392	3	0.00876229	AAGE02017916	60943	Stegomyia aegypti	Aedes aegypti
AAGE02024244 contig	375	2	0.00873545	AAGE02024244	43043	Stegomyia aegypti	Aedes aegypti
AAGE02011136 contig	464	5	0.00873431	AAGE02011136	69721	Stegomyia aegypti	Aedes aegypti
AAGE02020273 contig	162	3	0.00872594	AAGE02020273	55696	Stegomyia aegypti	Aedes aegypti
AAGE02011327 contig	253	1	0.00870792	AAGE02011327	29054	Stegomyia aegypti	Aedes aegypti
AAGE02008153 contig	1595	15	0.00870567	AAGE02008153	256956	Stegomyia aegypti	Aedes aegypti
AAGE02025950 contig	113	1	0.00870436	AAGE02025950	12982	Stegomyia aegypti	Aedes aegypti
AAGE02015582 contig	102	1	0.00866463	AAGE02015582	11772	Stegomyia aegypti	Aedes aegypti
AAGE02015999 contig	129	1	0.00866353	AAGE02015999	14890	Stegomyia aegypti	Aedes aegypti
AAGE02018936 contig	246	1	0.00859809	AAGE02018936	28611	Stegomyia aegypti	Aedes aegypti
AAGE02027401 contig	269	1	0.0085841	AAGE02027401	31335	Stegomyia aegypti	Aedes aegypti
AAGE02012940 contig	200	2	0.00852624	AAGE02012940	46914	Stegomyia aegypti	Aedes aegypti
AAGE02005904 contig	128	1	0.0085197	AAGE02005904	15024	Stegomyia aegypti	Aedes aegypti
AAGE02016468 contig	112	1	0.00851064	AAGE02016468	13160	Stegomyia aegypti	Aedes aegypti
AAGE02009604 contig	250	1	0.00851006	AAGE02009604	29377	Stegomyia aegypti	Aedes aegypti
AAGE02012036 contig	255	1	0.00850908	AAGE02012036	29963	Stegomyia aegypti	Aedes aegypti
AAGE02022411 contig	149	1	0.00850408	AAGE02022411	17521	Stegomyia aegypti	Aedes aegypti
AAGE02009711 contig	422	3	0.00849583	AAGE02009711	81331	Stegomyia aegypti	Aedes aegypti
AAGE02019162 contig	189	1	0.00846698	AAGE02019162	22320	Stegomyia aegypti	Aedes aegypti
AAGE02024661 contig	251	4	0.00846021	AAGE02024661	59566	Stegomyia aegypti	Aedes aegypti
AAGE02019465 contig	187	1	0.00846001	AAGE02019465	22104	Stegomyia aegypti	Aedes aegypti
AAGE02014026 contig	453	2	0.00844992	AAGE02014026	53609	Stegomyia aegypti	Aedes aegypti
AAGE02023414 contig	247	1	0.00844473	AAGE02023414	29246	Stegomyia aegypti	Aedes aegypti
AAGE02010173 contig	160	3	0.00841346	AAGE02010173	19136	Stegomyia aegypti	Aedes aegypti
AAGE02004705 contig	115	1	0.00840705	AAGE02004705	13679	Stegomyia aegypti	Aedes aegypti
AAGE02017647 contig	208	1	0.0084037	AAGE02017647	24750	Stegomyia aegypti	Aedes aegypti
AAGE02017657 contig	1906	10	0.00838545	AAGE02017657	228013	Stegomyia aegypti	Aedes aegypti
AAGE02007112 contig	105	2	0.00836987	AAGE02007112	25090	Stegomyia aegypti	Aedes aegypti
AAGE02008934 contig	191	3	0.00836505	AAGE02008934	26539	Stegomyia aegypti	Aedes aegypti
AAGE02000362 contig	599	4	0.00835405	AAGE02000362	140763	Stegomyia aegypti	Aedes aegypti
AAGE02029328 contig	401	2	0.00834391	AAGE02029328	48058	Stegomyia aegypti	Aedes aegypti
AAGE02005275 contig	212	2	0.00833874	AAGE02005275	50846	Stegomyia aegypti	Aedes aegypti
AAGE02026947 contig	135	1	0.00833539	AAGE02026947	16194	Stegomyia aegypti	Aedes aegypti
AAGE02014071 contig	175	1	0.0082962	AAGE02014071	21094	Stegomyia aegypti	Aedes aegypti
AAGE02030249 contig	301	1	0.00827725	AAGE02030249	36848	Stegomyia aegypti	Aedes aegypti
AAGE02004356 contig	256	1	0.00827141	AAGE02004356	30950	Stegomyia aegypti	Aedes aegypti
AAGE02001494 contig	94	1	0.00826301	AAGE02001494	11376	Stegomyia aegypti	Aedes aegypti
AAGE02011148 contig	150	2	0.00824584	AAGE02011148	36382	Stegomyia aegypti	Aedes aegypti
AAGE02005955 contig	64	2	0.00824424	AAGE02005955	15526	Stegomyia aegypti	Aedes aegypti
AAGE02019323 contig	390	4	0.00822368	AAGE02019323	76607	Stegomyia aegypti	Aedes aegypti
AAGE02028307 contig	226	2	0.00820893	AAGE02028307	27531	Stegomyia aegypti	Aedes aegypti
AAGE02031184 contig	90	1	0.00818651	AAGE02031184	11238	Stegomyia aegypti	Aedes aegypti
AAGE02029253 contig	244	2	0.00815699	AAGE02029253	59826	Stegomyia aegypti	Aedes aegypti
AAGE02026608 contig	277	1	0.00811841	AAGE02026608	34120	Stegomyia aegypti	Aedes aegypti
AAGE02010179 contig	241	2	0.00811674	AAGE02010179	55440	Stegomyia aegypti	Aedes aegypti
AAGE02020987 contig	76	1	0.00811619	AAGE02020987	9364	Stegomyia aegypti	Aedes aegypti
AAGE02010726 contig	102	1	0.00809588	AAGE02010726	12599	Stegomyia aegypti	Aedes aegypti
AAGE02010239 contig	183	1	0.00808507	AAGE02010239	22755	Stegomyia aegypti	Aedes aegypti
AAGE02006776 contig	408	6	0.00806529	AAGE02006776	62611	Stegomyia aegypti	Aedes aegypti
AAGE02005479 contig	264	1	0.00804737	AAGE02005479	32930	Stegomyia aegypti	Aedes aegypti
AAGE02025158 contig	275	1	0.00804258	AAGE02025158	34190	Stegomyia aegypti	Aedes aegypti
AAGE02016211 contig	301	1	0.00803309	AAGE02016211	37716	Stegomyia aegypti	Aedes aegypti
AAGE02012486 contig	194	2	0.00800123	AAGE02012486	32620	Stegomyia aegypti	Aedes aegypti
AAGE02017420 contig	170	1	0.00799812	AAGE02017420	21255	Stegomyia aegypti	Aedes aegypti
AAGE02014888 contig	246	3	0.0079655	AAGE02014888	47078	Stegomyia aegypti	Aedes aegypti
AAGE02015799 contig	387	3	0.00796263	AAGE02015799	81129	Stegomyia aegypti	Aedes aegypti
AAGE02014909 contig	251	1	0.00792523	AAGE02014909	31671	Stegomyia aegypti	Aedes aegypti
AAGE02017557 contig	99	6	0.00792093	AAGE02017557	72340	Stegomyia aegypti	Aedes aegypti
AAGE02002353 contig	58	1	0.00790461	AAGE02002353	7464	Stegomyia aegypti	Aedes aegypti
AAGE02025132 contig	325	2	0.00789429	AAGE02025132	41166	Stegomyia aegypti	Aedes aegypti
AAGE02010181 contig	255	2	0.00788692	AAGE02010181	64664	Stegomyia aegypti	Aedes aegypti
AAGE02002269 contig	701	3	0.00787974	AAGE02002269	89468	Stegomyia aegypti	Aedes aegypti
AAGE02027205 contig	306	3	0.00787825	AAGE02027205	44680	Stegomyia aegypti	Aedes aegypti
AAGE02016478 contig	250	1	0.00786262	AAGE02016478	31795	Stegomyia aegypti	Aedes aegypti
AAGE02009480 contig	278	1	0.00786048	AAGE02009480	35494	Stegomyia aegypti	Aedes aegypti
AAGE02007460 contig	282	2	0.0078603	AAGE02007460	71752	Stegomyia aegypti	Aedes aegypti
AAGE02000375 contig	550	7	0.00785815	AAGE02000375	115167	Stegomyia aegypti	Aedes aegypti
AAGE02018901 contig	477	2	0.00784597	AAGE02018901	60920	Stegomyia aegypti	Aedes aegypti
AAGE02000892 contig	446	3	0.00783618	AAGE02000892	93029	Stegomyia aegypti	Aedes aegypti
AAGE02009437 contig	205	2	0.00782726	AAGE02009437	51358	Stegomyia aegypti	Aedes aegypti
AAGE02022737 contig	555	4	0.00782407	AAGE02022737	81026	Stegomyia aegypti	Aedes aegypti
AAGE02028330 contig	191	1	0.00782114	AAGE02028330	24421	Stegomyia aegypti	Aedes aegypti
AAGE02009395 contig	204	1	0.007814	AAGE02009395	26104	Stegomyia aegypti	Aedes aegypti
AAGE02025386 contig	260	2	0.00780944	AAGE02025386	66457	Stegomyia aegypti	Aedes aegypti
AAGE02022268 contig	805	3	0.00780195	AAGE02022268	103692	Stegomyia aegypti	Aedes aegypti
AAGE02007116 contig	241	1	0.00779633	AAGE02007116	30906	Stegomyia aegypti	Aedes aegypti
AAGE02014973 contig	229	1	0.00779309	AAGE02014973	29385	Stegomyia aegypti	Aedes aegypti
AAGE02010841 contig	209	1	0.00779095	AAGE02010841	26826	Stegomyia aegypti	Aedes aegypti
AAGE02017531 contig	482	2	0.00778854	AAGE02017531	62271	Stegomyia aegypti	Aedes aegypti
AAGE02019491 contig	173	1	0.00778543	AAGE02019491	22221	Stegomyia aegypti	Aedes aegypti
AAGE02028208 contig	261	1	0.00777781	AAGE02028208	33557	Stegomyia aegypti	Aedes aegypti
AAGE02016318 contig	492	3	0.00776784	AAGE02016318	96037	Stegomyia aegypti	Aedes aegypti
AAGE02019422 contig	204	1	0.00775931	AAGE02019422	26289	Stegomyia aegypti	Aedes aegypti
AAGE02022139 contig	342	5	0.00775563	AAGE02022139	44097	Stegomyia aegypti	Aedes aegypti
AAGE02000751 contig	535	2	0.00775205	AAGE02000751	69143	Stegomyia aegypti	Aedes aegypti
AAGE02017119 contig	383	2	0.00774428	AAGE02017119	49585	Stegomyia aegypti	Aedes aegypti
AAGE02001544 contig	254	2	0.00773994	AAGE02001544	32946	Stegomyia aegypti	Aedes aegypti
AAGE02008154 contig	109	1	0.00772776	AAGE02008154	14105	Stegomyia aegypti	Aedes aegypti
AAGE02026753 contig	59	1	0.00768935	AAGE02026753	7803	Stegomyia aegypti	Aedes aegypti
AAGE02003713 contig	350	3	0.0076737	AAGE02003713	57860	Stegomyia aegypti	Aedes aegypti
AAGE02024481 contig	217	4	0.0076686	AAGE02024481	39903	Stegomyia aegypti	Aedes aegypti
AAGE02014989 contig	226	2	0.00766076	AAGE02014989	59001	Stegomyia aegypti	Aedes aegypti
AAGE02025696 contig	493	2	0.0076563	AAGE02025696	64521	Stegomyia aegypti	Aedes aegypti
AAGE02015274 contig	164	1	0.00763536	AAGE02015274	21479	Stegomyia aegypti	Aedes aegypti
AAGE02020545 contig	624	4	0.00763209	AAGE02020545	81759	Stegomyia aegypti	Aedes aegypti
AAGE02029389 contig	125	1	0.00762521	AAGE02029389	16393	Stegomyia aegypti	Aedes aegypti
AAGE02006899 contig	531	6	0.00762023	AAGE02006899	112594	Stegomyia aegypti	Aedes aegypti
AAGE02004265 contig	117	1	0.00760799	AAGE02004265	15510	Stegomyia aegypti	Aedes aegypti
AAGE02004993 contig	237	1	0.00754417	AAGE02004993	31415	Stegomyia aegypti	Aedes aegypti
AAGE02018000 contig	244	1	0.00753994	AAGE02018000	32360	Stegomyia aegypti	Aedes aegypti
AAGE02015259 contig	269	1	0.00753354	AAGE02015259	35707	Stegomyia aegypti	Aedes aegypti
AAGE02021025 contig	533	2	0.0075099	AAGE02021025	70973	Stegomyia aegypti	Aedes aegypti
AAGE02016549 contig	266	1	0.00749549	AAGE02016549	35488	Stegomyia aegypti	Aedes aegypti
AAGE02028901 contig	234	1	0.00749232	AAGE02028901	31232	Stegomyia aegypti	Aedes aegypti
AAGE02024233 contig	157	1	0.00747797	AAGE02024233	20995	Stegomyia aegypti	Aedes aegypti
AAGE02016243 contig	298	5	0.00744209	AAGE02016243	57242	Stegomyia aegypti	Aedes aegypti
AAGE02002865 contig	133	1	0.00740823	AAGE02002865	17953	Stegomyia aegypti	Aedes aegypti
AAGE02009714 contig	233	1	0.00740061	AAGE02009714	31617	Stegomyia aegypti	Aedes aegypti
AAGE02013756 contig	519	2	0.00740001	AAGE02013756	70135	Stegomyia aegypti	Aedes aegypti
AAGE02017987 contig	66	1	0.00739579	AAGE02017987	8924	Stegomyia aegypti	Aedes aegypti
AAGE02002236 contig	862	6	0.00739084	AAGE02002236	126503	Stegomyia aegypti	Aedes aegypti
AAGE02011628 contig	72	8	0.00737582	AAGE02011628	78093	Stegomyia aegypti	Aedes aegypti
AAGE02002461 contig	280	1	0.00736489	AAGE02002461	38154	Stegomyia aegypti	Aedes aegypti
AAGE02008720 contig	535	5	0.00736114	AAGE02008720	141690	Stegomyia aegypti	Aedes aegypti
AAGE02009729 contig	239	4	0.00736075	AAGE02009729	68742	Stegomyia aegypti	Aedes aegypti
AAGE02010787 contig	216	1	0.00735595	AAGE02010787	29364	Stegomyia aegypti	Aedes aegypti
AAGE02033620 contig	94	1	0.00733573	AAGE02033620	12814	Stegomyia aegypti	Aedes aegypti
AAGE02014646 contig	263	5	0.00731354	AAGE02014646	61393	Stegomyia aegypti	Aedes aegypti
AAGE02010558 contig	265	1	0.00730289	AAGE02010558	36287	Stegomyia aegypti	Aedes aegypti
AAGE02005795 contig	119	1	0.00730017	AAGE02005795	16300	Stegomyia aegypti	Aedes aegypti
AAGE02005266 contig	103	1	0.00729525	AAGE02005266	14530	Stegomyia aegypti	Aedes aegypti
AAGE02027890 contig	243	1	0.0072785	AAGE02027890	33385	Stegomyia aegypti	Aedes aegypti
AAGE02021704 contig	545	2	0.00727481	AAGE02021704	74916	Stegomyia aegypti	Aedes aegypti
AAGE02011609 contig	243	2	0.00726457	AAGE02011609	66897	Stegomyia aegypti	Aedes aegypti
AAGE02025078 contig	271	1	0.00725103	AAGE02025078	37374	Stegomyia aegypti	Aedes aegypti
AAGE02032485 contig	131	1	0.00724798	AAGE02032485	18074	Stegomyia aegypti	Aedes aegypti
AAGE02032364 contig	70	1	0.00724038	AAGE02032364	9668	Stegomyia aegypti	Aedes aegypti
AAGE02002394 contig	252	1	0.00723888	AAGE02002394	34810	Stegomyia aegypti	Aedes aegypti
AAGE02018244 contig	82	1	0.00723359	AAGE02018244	11336	Stegomyia aegypti	Aedes aegypti
AAGE02014853 contig	61	1	0.00722578	AAGE02014853	8442	Stegomyia aegypti	Aedes aegypti
AAGE02028652 contig	161	1	0.00721941	AAGE02028652	22301	Stegomyia aegypti	Aedes aegypti
AAGE02017885 contig	674	4	0.00721938	AAGE02017885	121063	Stegomyia aegypti	Aedes aegypti
AAGE02008789 contig	52	1	0.00721721	AAGE02008789	7205	Stegomyia aegypti	Aedes aegypti
AAGE02009617 contig	266	1	0.00720028	AAGE02009617	36941	Stegomyia aegypti	Aedes aegypti
AAGE02001429 contig	495	2	0.00719905	AAGE02001429	68898	Stegomyia aegypti	Aedes aegypti
AAGE02007619 contig	265	2	0.00719836	AAGE02007619	73489	Stegomyia aegypti	Aedes aegypti
AAGE02027397 contig	409	2	0.0071921	AAGE02027397	57146	Stegomyia aegypti	Aedes aegypti
AAGE02013532 contig	58	2	0.00718756	AAGE02013532	16139	Stegomyia aegypti	Aedes aegypti
AAGE02024740 contig	162	1	0.00718149	AAGE02024740	22557	Stegomyia aegypti	Aedes aegypti
AAGE02018494 contig	52	1	0.0071734	AAGE02018494	7249	Stegomyia aegypti	Aedes aegypti
AAGE02008451 contig	135	1	0.0071677	AAGE02008451	18973	Stegomyia aegypti	Aedes aegypti
AAGE02007059 contig	578	5	0.00715805	AAGE02007059	80884	Stegomyia aegypti	Aedes aegypti
AAGE02029731 contig	243	1	0.00715063	AAGE02029731	33982	Stegomyia aegypti	Aedes aegypti
AAGE02000480 contig	182	7	0.00713716	AAGE02000480	72718	Stegomyia aegypti	Aedes aegypti
AAGE02024748 contig	92	1	0.00713455	AAGE02024748	12895	Stegomyia aegypti	Aedes aegypti
AAGE02025031 contig	263	1	0.00712235	AAGE02025031	36926	Stegomyia aegypti	Aedes aegypti
AAGE02019938 contig	259	1	0.00712153	AAGE02019938	36509	Stegomyia aegypti	Aedes aegypti
AAGE02012139 contig	220	1	0.00711985	AAGE02012139	31039	Stegomyia aegypti	Aedes aegypti
AAGE02016285 contig	249	2	0.00711185	AAGE02016285	35009	Stegomyia aegypti	Aedes aegypti
AAGE02004709 contig	154	1	0.00711054	AAGE02004709	21658	Stegomyia aegypti	Aedes aegypti
AAGE02013357 contig	113	1	0.00710513	AAGE02013357	15904	Stegomyia aegypti	Aedes aegypti
AAGE02016504 contig	204	2	0.0070869	AAGE02016504	57571	Stegomyia aegypti	Aedes aegypti
AAGE02021911 contig	234	1	0.00708511	AAGE02021911	33027	Stegomyia aegypti	Aedes aegypti
AAGE02006021 contig	277	1	0.00708479	AAGE02006021	39239	Stegomyia aegypti	Aedes aegypti
AAGE02009457 contig	505	4	0.00707828	AAGE02009457	71344	Stegomyia aegypti	Aedes aegypti
AAGE02008795 contig	44	1	0.00704446	AAGE02008795	6388	Stegomyia aegypti	Aedes aegypti
AAGE02008664 contig	172	1	0.00703563	AAGE02008664	24447	Stegomyia aegypti	Aedes aegypti
AAGE02001638 contig	421	4	0.00702786	AAGE02001638	95904	Stegomyia aegypti	Aedes aegypti
AAGE02020899 contig	145	1	0.00701194	AAGE02020899	20679	Stegomyia aegypti	Aedes aegypti
AAGE02017370 contig	93	1	0.00700829	AAGE02017370	13267	Stegomyia aegypti	Aedes aegypti
AAGE02022530 contig	140	1	0.00700245	AAGE02022530	19993	Stegomyia aegypti	Aedes aegypti
AAGE02023718 contig	944	5	0.00699964	AAGE02023718	134864	Stegomyia aegypti	Aedes aegypti
AAGE02010092 contig	436	3	0.00699681	AAGE02010092	62453	Stegomyia aegypti	Aedes aegypti
AAGE02015340 contig	478	3	0.00699239	AAGE02015340	68502	Stegomyia aegypti	Aedes aegypti
AAGE02000398 contig	264	1	0.00696008	AAGE02000398	38649	Stegomyia aegypti	Aedes aegypti
AAGE02003776 contig	467	3	0.00695994	AAGE02003776	67673	Stegomyia aegypti	Aedes aegypti
AAGE02013358 contig	2100	21	0.0069591	AAGE02013358	432664	Stegomyia aegypti	Aedes aegypti
AAGE02005590 contig	78	1	0.00695894	AAGE02005590	11496	Stegomyia aegypti	Aedes aegypti
AAGE02029483 contig	265	1	0.00695721	AAGE02029483	38090	Stegomyia aegypti	Aedes aegypti
AAGE02008744 contig	44	1	0.00695432	AAGE02008744	6327	Stegomyia aegypti	Aedes aegypti
AAGE02025325 contig	406	2	0.00694516	AAGE02025325	58602	Stegomyia aegypti	Aedes aegypti
AAGE02006746 contig	409	6	0.00694486	AAGE02006746	66667	Stegomyia aegypti	Aedes aegypti
AAGE02008502 contig	257	1	0.00694426	AAGE02008502	37585	Stegomyia aegypti	Aedes aegypti
AAGE02010866 contig	166	1	0.00694241	AAGE02010866	23911	Stegomyia aegypti	Aedes aegypti
AAGE02014164 contig	220	1	0.00692412	AAGE02014164	31773	Stegomyia aegypti	Aedes aegypti
AAGE02009994 contig	237	1	0.00691063	AAGE02009994	34293	Stegomyia aegypti	Aedes aegypti
AAGE02025998 contig	70	4	0.00690907	AAGE02025998	31406	Stegomyia aegypti	Aedes aegypti
AAGE02024051 contig	95	1	0.00689012	AAGE02024051	13933	Stegomyia aegypti	Aedes aegypti
AAGE02024262 contig	266	1	0.0068862	AAGE02024262	38628	Stegomyia aegypti	Aedes aegypti
AAGE02006086 contig	421	3	0.00687995	AAGE02006086	61482	Stegomyia aegypti	Aedes aegypti
AAGE02007474 contig	220	1	0.00686706	AAGE02007474	32037	Stegomyia aegypti	Aedes aegypti
AAGE02001461 contig	319	4	0.00685624	AAGE02001461	63300	Stegomyia aegypti	Aedes aegypti
AAGE02006337 contig	715	6	0.00685229	AAGE02006337	177312	Stegomyia aegypti	Aedes aegypti
AAGE02014947 contig	361	4	0.00684862	AAGE02014947	117684	Stegomyia aegypti	Aedes aegypti
AAGE02005293 contig	256	1	0.00684272	AAGE02005293	37412	Stegomyia aegypti	Aedes aegypti
AAGE02024918 contig	288	4	0.00683878	AAGE02024918	169619	Stegomyia aegypti	Aedes aegypti
AAGE02004101 contig	254	3	0.00683841	AAGE02004101	63461	Stegomyia aegypti	Aedes aegypti
AAGE02010118 contig	250	1	0.00682668	AAGE02010118	36621	Stegomyia aegypti	Aedes aegypti
AAGE02003308 contig	235	2	0.00681891	AAGE02003308	34462	Stegomyia aegypti	Aedes aegypti
AAGE02000340 contig	478	2	0.00681566	AAGE02000340	70425	Stegomyia aegypti	Aedes aegypti
AAGE02028481 contig	130	2	0.00679986	AAGE02028481	28530	Stegomyia aegypti	Aedes aegypti
AAGE02014253 contig	42	2	0.00679942	AAGE02014253	12354	Stegomyia aegypti	Aedes aegypti
AAGE02006406 contig	192	2	0.00678853	AAGE02006406	28282	Stegomyia aegypti	Aedes aegypti
AAGE02009318 contig	589	6	0.00678618	AAGE02009318	106096	Stegomyia aegypti	Aedes aegypti
AAGE02016086 contig	296	2	0.00676123	AAGE02016086	43779	Stegomyia aegypti	Aedes aegypti
AAGE02006548 contig	416	2	0.00676005	AAGE02006548	61535	Stegomyia aegypti	Aedes aegypti
AAGE02026446 contig	222	1	0.00675923	AAGE02026446	32844	Stegomyia aegypti	Aedes aegypti
AAGE02005186 contig	257	1	0.00675214	AAGE02005186	38061	Stegomyia aegypti	Aedes aegypti
AAGE02003896 contig	905	7	0.00674769	AAGE02003896	185544	Stegomyia aegypti	Aedes aegypti
AAGE02016432 contig	137	1	0.00673815	AAGE02016432	20332	Stegomyia aegypti	Aedes aegypti
AAGE02012963 contig	29	2	0.00673557	AAGE02012963	8611	Stegomyia aegypti	Aedes aegypti
AAGE02031576 contig	159	2	0.0067066	AAGE02031576	23706	Stegomyia aegypti	Aedes aegypti
AAGE02014232 contig	287	1	0.00670469	AAGE02014232	42955	Stegomyia aegypti	Aedes aegypti
AAGE02028964 contig	271	1	0.00667932	AAGE02028964	40573	Stegomyia aegypti	Aedes aegypti
AAGE02012269 contig	136	1	0.00667699	AAGE02012269	20668	Stegomyia aegypti	Aedes aegypti
AAGE02009021 contig	244	2	0.00666767	AAGE02009021	73189	Stegomyia aegypti	Aedes aegypti
AAGE02031542 contig	251	1	0.00666507	AAGE02031542	37659	Stegomyia aegypti	Aedes aegypti
AAGE02026236 contig	51	2	0.00665015	AAGE02026236	15338	Stegomyia aegypti	Aedes aegypti
AAGE02024190 contig	276	1	0.00664132	AAGE02024190	41558	Stegomyia aegypti	Aedes aegypti
AAGE02001768 contig	243	1	0.00664025	AAGE02001768	36595	Stegomyia aegypti	Aedes aegypti
AAGE02026093 contig	308	2	0.00663007	AAGE02026093	46450	Stegomyia aegypti	Aedes aegypti
AAGE02016467 contig	255	2	0.00662725	AAGE02016467	76955	Stegomyia aegypti	Aedes aegypti
AAGE02006695 contig	253	1	0.0066054	AAGE02006695	38302	Stegomyia aegypti	Aedes aegypti
AAGE02011341 contig	320	2	0.00659327	AAGE02011341	48686	Stegomyia aegypti	Aedes aegypti
AAGE02015832 contig	230	3	0.00659246	AAGE02015832	48689	Stegomyia aegypti	Aedes aegypti
AAGE02017910 contig	287	1	0.00659013	AAGE02017910	43550	Stegomyia aegypti	Aedes aegypti
AAGE02028448 contig	103	1	0.00657811	AAGE02028448	15658	Stegomyia aegypti	Aedes aegypti
AAGE02015350 contig	234	1	0.00657637	AAGE02015350	35734	Stegomyia aegypti	Aedes aegypti
AAGE02002113 contig	654	10	0.00656691	AAGE02002113	164004	Stegomyia aegypti	Aedes aegypti
AAGE02005079 contig	78	1	0.00654136	AAGE02005079	12077	Stegomyia aegypti	Aedes aegypti
AAGE02016488 contig	410	3	0.00651383	AAGE02016488	62942	Stegomyia aegypti	Aedes aegypti
AAGE02000952 contig	197	2	0.00651293	AAGE02000952	60495	Stegomyia aegypti	Aedes aegypti
AAGE02026135 contig	171	1	0.00650561	AAGE02026135	26285	Stegomyia aegypti	Aedes aegypti
AAGE02012318 contig	215	1	0.00647805	AAGE02012318	33189	Stegomyia aegypti	Aedes aegypti
AAGE02000911 contig	586	3	0.00646935	AAGE02000911	90581	Stegomyia aegypti	Aedes aegypti
AAGE02006892 contig	389	2	0.00643582	AAGE02006892	60443	Stegomyia aegypti	Aedes aegypti
AAGE02016986 contig	235	2	0.0064248	AAGE02016986	73153	Stegomyia aegypti	Aedes aegypti
AAGE02025418 contig	85	1	0.00641994	AAGE02025418	13239	Stegomyia aegypti	Aedes aegypti
AAGE02011311 contig	254	1	0.00641333	AAGE02011311	39605	Stegomyia aegypti	Aedes aegypti
AAGE02005679 contig	283	3	0.00640547	AAGE02005679	56201	Stegomyia aegypti	Aedes aegypti
AAGE02006278 contig	130	1	0.00638444	AAGE02006278	20362	Stegomyia aegypti	Aedes aegypti
AAGE02006685 contig	690	3	0.00638079	AAGE02006685	108137	Stegomyia aegypti	Aedes aegypti
AAGE02024165 contig	277	3	0.00637134	AAGE02024165	56503	Stegomyia aegypti	Aedes aegypti
AAGE02013662 contig	253	1	0.00635391	AAGE02013662	39818	Stegomyia aegypti	Aedes aegypti
AAGE02028851 contig	304	1	0.00634862	AAGE02028851	48357	Stegomyia aegypti	Aedes aegypti
AAGE02008031 contig	1160	6	0.00634414	AAGE02008031	194195	Stegomyia aegypti	Aedes aegypti
AAGE02004031 contig	68	2	0.00633855	AAGE02004031	21455	Stegomyia aegypti	Aedes aegypti
AAGE02025460 contig	230	1	0.00633731	AAGE02025460	36293	Stegomyia aegypti	Aedes aegypti
AAGE02024487 contig	141	1	0.00633338	AAGE02024487	22263	Stegomyia aegypti	Aedes aegypti
AAGE02024065 contig	283	2	0.00632396	AAGE02024065	88394	Stegomyia aegypti	Aedes aegypti
AAGE02003697 contig	266	2	0.00631829	AAGE02003697	74228	Stegomyia aegypti	Aedes aegypti
AAGE02026363 contig	367	2	0.00631659	AAGE02026363	58101	Stegomyia aegypti	Aedes aegypti
AAGE02030069 contig	233	1	0.00631436	AAGE02030069	36900	Stegomyia aegypti	Aedes aegypti
AAGE02000028 contig	343	1	0.00629625	AAGE02000028	55260	Stegomyia aegypti	Aedes aegypti
AAGE02031349 contig	138	1	0.00629045	AAGE02031349	21936	Stegomyia aegypti	Aedes aegypti
AAGE02010405 contig	853	8	0.00628501	AAGE02010405	200635	Stegomyia aegypti	Aedes aegypti
AAGE02003654 contig	275	1	0.00627929	AAGE02003654	43952	Stegomyia aegypti	Aedes aegypti
AAGE02001490 contig	329	2	0.00626488	AAGE02001490	52515	Stegomyia aegypti	Aedes aegypti
AAGE02008592 contig	430	2	0.00624829	AAGE02008592	69298	Stegomyia aegypti	Aedes aegypti
AAGE02017579 contig	138	1	0.00623137	AAGE02017579	22144	Stegomyia aegypti	Aedes aegypti
AAGE02008447 contig	96	1	0.00623093	AAGE02008447	15407	Stegomyia aegypti	Aedes aegypti
AAGE02010686 contig	197	1	0.00621352	AAGE02010686	31866	Stegomyia aegypti	Aedes aegypti
AAGE02008590 contig	231	1	0.00620251	AAGE02008590	37243	Stegomyia aegypti	Aedes aegypti
AAGE02018879 contig	174	1	0.0061968	AAGE02018879	28079	Stegomyia aegypti	Aedes aegypti
AAGE02009228 contig	164	4	0.00619593	AAGE02009228	105876	Stegomyia aegypti	Aedes aegypti
AAGE02021882 contig	219	1	0.00619431	AAGE02021882	35350	Stegomyia aegypti	Aedes aegypti
AAGE02020818 contig	501	8	0.00618766	AAGE02020818	128320	Stegomyia aegypti	Aedes aegypti
AAGE02028349 contig	195	1	0.006184	AAGE02028349	31533	Stegomyia aegypti	Aedes aegypti
AAGE02009047 contig	164	1	0.00617935	AAGE02009047	26540	Stegomyia aegypti	Aedes aegypti
AAGE02030908 contig	146	1	0.00617623	AAGE02030908	23639	Stegomyia aegypti	Aedes aegypti
AAGE02008129 contig	202	2	0.0061649	AAGE02008129	41201	Stegomyia aegypti	Aedes aegypti
AAGE02018679 contig	176	1	0.00615374	AAGE02018679	28762	Stegomyia aegypti	Aedes aegypti
AAGE02016081 contig	201	1	0.00614574	AAGE02016081	33030	Stegomyia aegypti	Aedes aegypti
AAGE02005736 contig	247	2	0.00613595	AAGE02005736	62581	Stegomyia aegypti	Aedes aegypti
AAGE02006602 contig	269	1	0.00612659	AAGE02006602	43907	Stegomyia aegypti	Aedes aegypti
AAGE02006876 contig	244	1	0.0061245	AAGE02006876	39840	Stegomyia aegypti	Aedes aegypti
AAGE02025133 contig	391	3	0.00611071	AAGE02025133	63986	Stegomyia aegypti	Aedes aegypti
AAGE02022320 contig	210	1	0.00610607	AAGE02022320	34391	Stegomyia aegypti	Aedes aegypti
AAGE02025840 contig	366	2	0.00610363	AAGE02025840	60291	Stegomyia aegypti	Aedes aegypti
AAGE02024798 contig	506	2	0.00609837	AAGE02024798	82972	Stegomyia aegypti	Aedes aegypti
AAGE02022483 contig	255	1	0.0060865	AAGE02022483	41896	Stegomyia aegypti	Aedes aegypti
AAGE02024511 contig	278	2	0.00607929	AAGE02024511	91458	Stegomyia aegypti	Aedes aegypti
AAGE02020047 contig	411	3	0.00607429	AAGE02020047	74410	Stegomyia aegypti	Aedes aegypti
AAGE02026547 contig	90	1	0.00606748	AAGE02026547	14997	Stegomyia aegypti	Aedes aegypti
AAGE02003566 contig	61	1	0.00606422	AAGE02003566	10059	Stegomyia aegypti	Aedes aegypti
AAGE02004770 contig	44	1	0.00606395	AAGE02004770	7256	Stegomyia aegypti	Aedes aegypti
AAGE02009750 contig	591	4	0.0060626	AAGE02009750	97478	Stegomyia aegypti	Aedes aegypti
AAGE02022590 contig	119	1	0.00605694	AAGE02022590	19812	Stegomyia aegypti	Aedes aegypti
AAGE02007546 contig	155	1	0.00605138	AAGE02007546	25612	Stegomyia aegypti	Aedes aegypti
AAGE02017541 contig	119	3	0.00603816	AAGE02017541	59124	Stegomyia aegypti	Aedes aegypti
AAGE02024895 contig	97	1	0.00602784	AAGE02024895	16092	Stegomyia aegypti	Aedes aegypti
AAGE02007550 contig	276	1	0.00602318	AAGE02007550	45822	Stegomyia aegypti	Aedes aegypti
AAGE02014664 contig	1202	8	0.00602175	AAGE02014664	231159	Stegomyia aegypti	Aedes aegypti
AAGE02023918 contig	166	1	0.00601624	AAGE02023918	27592	Stegomyia aegypti	Aedes aegypti
AAGE02022140 contig	233	6	0.00601435	AAGE02022140	72327	Stegomyia aegypti	Aedes aegypti
AAGE02016357 contig	131	4	0.00601398	AAGE02016357	39907	Stegomyia aegypti	Aedes aegypti
AAGE02003436 contig	289	2	0.00600482	AAGE02003436	48127	Stegomyia aegypti	Aedes aegypti
AAGE02011368 contig	258	1	0.00597207	AAGE02011368	43535	Stegomyia aegypti	Aedes aegypti
AAGE02027494 contig	267	1	0.0059402	AAGE02027494	44946	Stegomyia aegypti	Aedes aegypti
AAGE02003691 contig	307	1	0.00593209	AAGE02003691	51918	Stegomyia aegypti	Aedes aegypti
AAGE02009368 contig	256	1	0.00592702	AAGE02009368	43192	Stegomyia aegypti	Aedes aegypti
AAGE02017791 contig	182	1	0.00591966	AAGE02017791	30745	Stegomyia aegypti	Aedes aegypti
AAGE02001155 contig	130	3	0.00591913	AAGE02001155	30071	Stegomyia aegypti	Aedes aegypti
AAGE02023435 contig	151	1	0.00589153	AAGE02023435	25630	Stegomyia aegypti	Aedes aegypti
AAGE02026007 contig	195	1	0.00588661	AAGE02026007	33126	Stegomyia aegypti	Aedes aegypti
AAGE02017778 contig	525	2	0.00587907	AAGE02017778	89640	Stegomyia aegypti	Aedes aegypti
AAGE02009995 contig	507	4	0.00587847	AAGE02009995	128775	Stegomyia aegypti	Aedes aegypti
AAGE02025245 contig	449	2	0.00587227	AAGE02025245	76461	Stegomyia aegypti	Aedes aegypti
AAGE02022958 contig	82	1	0.00587224	AAGE02022958	13964	Stegomyia aegypti	Aedes aegypti
AAGE02009431 contig	238	1	0.0058651	AAGE02009431	40579	Stegomyia aegypti	Aedes aegypti
AAGE02024967 contig	235	1	0.00586444	AAGE02024967	40072	Stegomyia aegypti	Aedes aegypti
AAGE02020448 contig	284	1	0.00586208	AAGE02020448	48445	Stegomyia aegypti	Aedes aegypti
AAGE02019042 contig	211	1	0.00582648	AAGE02019042	36214	Stegomyia aegypti	Aedes aegypti
AAGE02012904 contig	200	2	0.00580382	AAGE02012904	50484	Stegomyia aegypti	Aedes aegypti
AAGE02017803 contig	147	4	0.00579186	AAGE02017803	38157	Stegomyia aegypti	Aedes aegypti
AAGE02003446 contig	185	1	0.00578604	AAGE02003446	32492	Stegomyia aegypti	Aedes aegypti
AAGE02007006 contig	45	2	0.00577998	AAGE02007006	15571	Stegomyia aegypti	Aedes aegypti
AAGE02016093 contig	130	1	0.00577572	AAGE02016093	22508	Stegomyia aegypti	Aedes aegypti
AAGE02011137 contig	86	1	0.00576369	AAGE02011137	14921	Stegomyia aegypti	Aedes aegypti
AAGE02010101 contig	178	2	0.00574694	AAGE02010101	30970	Stegomyia aegypti	Aedes aegypti
AAGE02015301 contig	246	1	0.00572687	AAGE02015301	43130	Stegomyia aegypti	Aedes aegypti
AAGE02014739 contig	283	1	0.0057178	AAGE02014739	50369	Stegomyia aegypti	Aedes aegypti
AAGE02015344 contig	698	4	0.00571541	AAGE02015344	122125	Stegomyia aegypti	Aedes aegypti
AAGE02014695 contig	262	2	0.00570819	AAGE02014695	45899	Stegomyia aegypti	Aedes aegypti
AAGE02011372 contig	164	1	0.00568966	AAGE02011372	29000	Stegomyia aegypti	Aedes aegypti
AAGE02012349 contig	73	1	0.00568311	AAGE02012349	13197	Stegomyia aegypti	Aedes aegypti
AAGE02003333 contig	247	1	0.00567803	AAGE02003333	43501	Stegomyia aegypti	Aedes aegypti
AAGE02016695 contig	56	1	0.00567031	AAGE02016695	9876	Stegomyia aegypti	Aedes aegypti
AAGE02017102 contig	388	3	0.00566766	AAGE02017102	115568	Stegomyia aegypti	Aedes aegypti
AAGE02005195 contig	227	3	0.00566739	AAGE02005195	68107	Stegomyia aegypti	Aedes aegypti
AAGE02008494 contig	218	2	0.00566388	AAGE02008494	76979	Stegomyia aegypti	Aedes aegypti
AAGE02032877 contig	68	1	0.00566383	AAGE02032877	12006	Stegomyia aegypti	Aedes aegypti
AAGE02000070 contig	552	11	0.00566204	AAGE02000070	335210	Stegomyia aegypti	Aedes aegypti
AAGE02005531 contig	170	3	0.00565316	AAGE02005531	90213	Stegomyia aegypti	Aedes aegypti
AAGE02005152 contig	244	1	0.00563789	AAGE02005152	43456	Stegomyia aegypti	Aedes aegypti
AAGE02016297 contig	60	1	0.00563751	AAGE02016297	10643	Stegomyia aegypti	Aedes aegypti
AAGE02032736 contig	114	1	0.00562602	AAGE02032736	20262	Stegomyia aegypti	Aedes aegypti
AAGE02000463 contig	235	1	0.00562349	AAGE02000463	41789	Stegomyia aegypti	Aedes aegypti
AAGE02006536 contig	294	2	0.0056226	AAGE02006536	52284	Stegomyia aegypti	Aedes aegypti
AAGE02024838 contig	238	1	0.00561944	AAGE02024838	42353	Stegomyia aegypti	Aedes aegypti
AAGE02005796 contig	744	5	0.00561197	AAGE02005796	181398	Stegomyia aegypti	Aedes aegypti
AAGE02029294 contig	167	1	0.0056076	AAGE02029294	29779	Stegomyia aegypti	Aedes aegypti
AAGE02019854 contig	237	1	0.00560575	AAGE02019854	42278	Stegomyia aegypti	Aedes aegypti
AAGE02016132 contig	275	1	0.00559865	AAGE02016132	49119	Stegomyia aegypti	Aedes aegypti
AAGE02004364 contig	267	1	0.0055976	AAGE02004364	47699	Stegomyia aegypti	Aedes aegypti
AAGE02008403 contig	665	4	0.00558551	AAGE02008403	119234	Stegomyia aegypti	Aedes aegypti
AAGE02014892 contig	251	1	0.00558013	AAGE02014892	44980	Stegomyia aegypti	Aedes aegypti
AAGE02020395 contig	357	2	0.00555271	AAGE02020395	64472	Stegomyia aegypti	Aedes aegypti
AAGE02001288 contig	336	3	0.00554209	AAGE02001288	60627	Stegomyia aegypti	Aedes aegypti
AAGE02000895 contig	123	1	0.00553879	AAGE02000895	22203	Stegomyia aegypti	Aedes aegypti
AAGE02018281 contig	210	3	0.00553538	AAGE02018281	90869	Stegomyia aegypti	Aedes aegypti
AAGE02023365 contig	171	1	0.00553416	AAGE02023365	30899	Stegomyia aegypti	Aedes aegypti
AAGE02022580 contig	310	3	0.00550543	AAGE02022580	95539	Stegomyia aegypti	Aedes aegypti
AAGE02024799 contig	899	9	0.00549833	AAGE02024799	195332	Stegomyia aegypti	Aedes aegypti
AAGE02022994 contig	122	1	0.00549698	AAGE02022994	22194	Stegomyia aegypti	Aedes aegypti
AAGE02011800 contig	107	1	0.00548184	AAGE02011800	19519	Stegomyia aegypti	Aedes aegypti
AAGE02022792 contig	90	1	0.00548145	AAGE02022792	16419	Stegomyia aegypti	Aedes aegypti
AAGE02003849 contig	170	1	0.00547928	AAGE02003849	31026	Stegomyia aegypti	Aedes aegypti
AAGE02017559 contig	258	4	0.00547797	AAGE02017559	116284	Stegomyia aegypti	Aedes aegypti
AAGE02026311 contig	65	1	0.00545714	AAGE02026311	11911	Stegomyia aegypti	Aedes aegypti
AAGE02006886 contig	244	1	0.00545678	AAGE02006886	44714	Stegomyia aegypti	Aedes aegypti
AAGE02019029 contig	492	3	0.00544994	AAGE02019029	139816	Stegomyia aegypti	Aedes aegypti
AAGE02001518 contig	41	1	0.00544633	AAGE02001518	7528	Stegomyia aegypti	Aedes aegypti
AAGE02022635 contig	258	1	0.00544476	AAGE02022635	47385	Stegomyia aegypti	Aedes aegypti
AAGE02020301 contig	72	1	0.00544341	AAGE02020301	13227	Stegomyia aegypti	Aedes aegypti
AAGE02016369 contig	282	1	0.00542642	AAGE02016369	51966	Stegomyia aegypti	Aedes aegypti
AAGE02022690 contig	71	1	0.00541489	AAGE02022690	13111	Stegomyia aegypti	Aedes aegypti
AAGE02010160 contig	176	1	0.00541389	AAGE02010160	32509	Stegomyia aegypti	Aedes aegypti
AAGE02017904 contig	247	1	0.00541192	AAGE02017904	45640	Stegomyia aegypti	Aedes aegypti
AAGE02017205 contig	278	1	0.00540835	AAGE02017205	51402	Stegomyia aegypti	Aedes aegypti
AAGE02003410 contig	767	6	0.0054081	AAGE02003410	166230	Stegomyia aegypti	Aedes aegypti
AAGE02005726 contig	229	1	0.00540082	AAGE02005726	42401	Stegomyia aegypti	Aedes aegypti
AAGE02002781 contig	534	2	0.00539596	AAGE02002781	98963	Stegomyia aegypti	Aedes aegypti
AAGE02025813 contig	108	1	0.00539189	AAGE02025813	20401	Stegomyia aegypti	Aedes aegypti
AAGE02019766 contig	490	3	0.00538767	AAGE02019766	91133	Stegomyia aegypti	Aedes aegypti
AAGE02028581 contig	277	1	0.00538561	AAGE02028581	51619	Stegomyia aegypti	Aedes aegypti
AAGE02020444 contig	271	1	0.00538083	AAGE02020444	50364	Stegomyia aegypti	Aedes aegypti
AAGE02024701 contig	256	4	0.00537535	AAGE02024701	189939	Stegomyia aegypti	Aedes aegypti
AAGE02015451 contig	126	2	0.00537153	AAGE02015451	46914	Stegomyia aegypti	Aedes aegypti
AAGE02026259 contig	160	1	0.00536381	AAGE02026259	30016	Stegomyia aegypti	Aedes aegypti
AAGE02032932 contig	128	1	0.00535834	AAGE02032932	23888	Stegomyia aegypti	Aedes aegypti
AAGE02004207 contig	82	1	0.00535283	AAGE02004207	15319	Stegomyia aegypti	Aedes aegypti
AAGE02021756 contig	773	3	0.00535152	AAGE02021756	144440	Stegomyia aegypti	Aedes aegypti
AAGE02007844 contig	453	4	0.00535087	AAGE02007844	84846	Stegomyia aegypti	Aedes aegypti
AAGE02020944 contig	164	1	0.00535004	AAGE02020944	30654	Stegomyia aegypti	Aedes aegypti
AAGE02022209 contig	600	6	0.00534919	AAGE02022209	157028	Stegomyia aegypti	Aedes aegypti
AAGE02001543 contig	255	1	0.00533607	AAGE02001543	47788	Stegomyia aegypti	Aedes aegypti
AAGE02015349 contig	233	1	0.00532231	AAGE02015349	43777	Stegomyia aegypti	Aedes aegypti
AAGE02002386 contig	395	2	0.0053155	AAGE02002386	74310	Stegomyia aegypti	Aedes aegypti
AAGE02016087 contig	359	3	0.00530803	AAGE02016087	92313	Stegomyia aegypti	Aedes aegypti
AAGE02029929 contig	97	2	0.00530373	AAGE02029929	18289	Stegomyia aegypti	Aedes aegypti
AAGE02010549 contig	561	4	0.00530329	AAGE02010549	153301	Stegomyia aegypti	Aedes aegypti
AAGE02008578 contig	365	2	0.00529323	AAGE02008578	68956	Stegomyia aegypti	Aedes aegypti
AAGE02006594 contig	274	1	0.00528335	AAGE02006594	51861	Stegomyia aegypti	Aedes aegypti
AAGE02022485 contig	561	2	0.00527224	AAGE02022485	106596	Stegomyia aegypti	Aedes aegypti
AAGE02021418 contig	268	8	0.00526918	AAGE02021418	160934	Stegomyia aegypti	Aedes aegypti
AAGE02019320 contig	267	1	0.00526762	AAGE02019320	50687	Stegomyia aegypti	Aedes aegypti
AAGE02017055 contig	156	1	0.00526725	AAGE02017055	29614	Stegomyia aegypti	Aedes aegypti
AAGE02009011 contig	181	1	0.0052601	AAGE02009011	34409	Stegomyia aegypti	Aedes aegypti
AAGE02004543 contig	54	1	0.0052473	AAGE02004543	10291	Stegomyia aegypti	Aedes aegypti
AAGE02016526 contig	390	2	0.00523427	AAGE02016526	74509	Stegomyia aegypti	Aedes aegypti
AAGE02013920 contig	292	1	0.00522941	AAGE02013920	55838	Stegomyia aegypti	Aedes aegypti
AAGE02024797 contig	379	2	0.0052265	AAGE02024797	73087	Stegomyia aegypti	Aedes aegypti
AAGE02024704 contig	333	2	0.00521573	AAGE02024704	64037	Stegomyia aegypti	Aedes aegypti
AAGE02003226 contig	81	1	0.00520867	AAGE02003226	15551	Stegomyia aegypti	Aedes aegypti
AAGE02030853 contig	222	1	0.00520394	AAGE02030853	42660	Stegomyia aegypti	Aedes aegypti
AAGE02020676 contig	267	1	0.0051987	AAGE02020676	51359	Stegomyia aegypti	Aedes aegypti
AAGE02020632 contig	156	1	0.00519532	AAGE02020632	30022	Stegomyia aegypti	Aedes aegypti
AAGE02009577 contig	102	1	0.00519295	AAGE02009577	19640	Stegomyia aegypti	Aedes aegypti
AAGE02018089 contig	101	3	0.0051882	AAGE02018089	28719	Stegomyia aegypti	Aedes aegypti
AAGE02021421 contig	177	2	0.00517984	AAGE02021421	44596	Stegomyia aegypti	Aedes aegypti
AAGE02011729 contig	503	3	0.00517512	AAGE02011729	109755	Stegomyia aegypti	Aedes aegypti
AAGE02013361 contig	181	1	0.00516966	AAGE02013361	35012	Stegomyia aegypti	Aedes aegypti
AAGE02007489 contig	347	2	0.00515472	AAGE02007489	67510	Stegomyia aegypti	Aedes aegypti
AAGE02025920 contig	40	1	0.00514801	AAGE02025920	7770	Stegomyia aegypti	Aedes aegypti
AAGE02030171 contig	109	1	0.00514175	AAGE02030171	21199	Stegomyia aegypti	Aedes aegypti
AAGE02000436 contig	178	1	0.00513205	AAGE02000436	34684	Stegomyia aegypti	Aedes aegypti
AAGE02012991 contig	351	2	0.00512581	AAGE02012991	68476	Stegomyia aegypti	Aedes aegypti
AAGE02022542 contig	283	2	0.00512302	AAGE02022542	55436	Stegomyia aegypti	Aedes aegypti
AAGE02004639 contig	564	5	0.00510638	AAGE02004639	128270	Stegomyia aegypti	Aedes aegypti
AAGE02006737 contig	432	3	0.00510617	AAGE02006737	85190	Stegomyia aegypti	Aedes aegypti
AAGE02010011 contig	280	3	0.00510466	AAGE02010011	81886	Stegomyia aegypti	Aedes aegypti
AAGE02018079 contig	252	1	0.00509629	AAGE02018079	49644	Stegomyia aegypti	Aedes aegypti
AAGE02022960 contig	267	1	0.00508416	AAGE02022960	52516	Stegomyia aegypti	Aedes aegypti
AAGE02019199 contig	306	2	0.00507286	AAGE02019199	60321	Stegomyia aegypti	Aedes aegypti
AAGE02000169 contig	256	1	0.00507081	AAGE02000169	50485	Stegomyia aegypti	Aedes aegypti
AAGE02019988 contig	232	1	0.00506933	AAGE02019988	46945	Stegomyia aegypti	Aedes aegypti
AAGE02025857 contig	271	1	0.00506883	AAGE02025857	53464	Stegomyia aegypti	Aedes aegypti
AAGE02018897 contig	248	1	0.00504414	AAGE02018897	49166	Stegomyia aegypti	Aedes aegypti
AAGE02008364 contig	1114	6	0.00504382	AAGE02008364	221258	Stegomyia aegypti	Aedes aegypti
AAGE02006988 contig	165	1	0.0050414	AAGE02006988	32729	Stegomyia aegypti	Aedes aegypti
AAGE02007361 contig	553	3	0.00503918	AAGE02007361	109740	Stegomyia aegypti	Aedes aegypti
AAGE02014641 contig	460	3	0.0050357	AAGE02014641	91744	Stegomyia aegypti	Aedes aegypti
AAGE02016397 contig	247	1	0.00503045	AAGE02016397	49101	Stegomyia aegypti	Aedes aegypti
AAGE02011142 contig	429	2	0.00502935	AAGE02011142	86889	Stegomyia aegypti	Aedes aegypti
AAGE02000379 contig	271	2	0.00502699	AAGE02000379	107818	Stegomyia aegypti	Aedes aegypti
AAGE02016966 contig	659	5	0.00502181	AAGE02016966	189373	Stegomyia aegypti	Aedes aegypti
AAGE02006328 contig	249	1	0.00502036	AAGE02006328	49598	Stegomyia aegypti	Aedes aegypti
AAGE02027634 contig	130	1	0.00500115	AAGE02027634	25987	Stegomyia aegypti	Aedes aegypti
AAGE02001359 contig	377	4	0.00499335	AAGE02001359	87916	Stegomyia aegypti	Aedes aegypti
AAGE02005794 contig	894	8	0.0049914	AAGE02005794	244818	Stegomyia aegypti	Aedes aegypti
AAGE02005963 contig	410	3	0.00498972	AAGE02005963	82169	Stegomyia aegypti	Aedes aegypti
AAGE02026290 contig	80	1	0.00498971	AAGE02026290	16032	Stegomyia aegypti	Aedes aegypti
AAGE02004587 contig	258	1	0.00498859	AAGE02004587	51718	Stegomyia aegypti	Aedes aegypti
AAGE02009440 contig	310	2	0.00497652	AAGE02009440	71134	Stegomyia aegypti	Aedes aegypti
AAGE02026882 contig	287	2	0.00496995	AAGE02026882	115290	Stegomyia aegypti	Aedes aegypti
AAGE02003784 contig	685	4	0.00496939	AAGE02003784	138041	Stegomyia aegypti	Aedes aegypti
AAGE02011896 contig	186	1	0.00496556	AAGE02011896	37458	Stegomyia aegypti	Aedes aegypti
AAGE02026165 contig	236	2	0.00493935	AAGE02026165	47978	Stegomyia aegypti	Aedes aegypti
AAGE02013371 contig	472	3	0.00492826	AAGE02013371	95977	Stegomyia aegypti	Aedes aegypti
AAGE02020786 contig	54	1	0.00492521	AAGE02020786	10964	Stegomyia aegypti	Aedes aegypti
AAGE02005183 contig	365	2	0.00492232	AAGE02005183	74152	Stegomyia aegypti	Aedes aegypti
AAGE02018346 contig	281	1	0.00492198	AAGE02018346	57289	Stegomyia aegypti	Aedes aegypti
AAGE02005674 contig	158	1	0.004914	AAGE02005674	32153	Stegomyia aegypti	Aedes aegypti
AAGE02015576 contig	28	1	0.00491314	AAGE02015576	5699	Stegomyia aegypti	Aedes aegypti
AAGE02021063 contig	124	1	0.00490371	AAGE02021063	25286	Stegomyia aegypti	Aedes aegypti
AAGE02015257 contig	62	1	0.00490312	AAGE02015257	12642	Stegomyia aegypti	Aedes aegypti
AAGE02001430 contig	251	1	0.00490167	AAGE02001430	51207	Stegomyia aegypti	Aedes aegypti
AAGE02003698 contig	276	1	0.0048866	AAGE02003698	56481	Stegomyia aegypti	Aedes aegypti
AAGE02012530 contig	90	1	0.00488069	AAGE02012530	18440	Stegomyia aegypti	Aedes aegypti
AAGE02020466 contig	113	1	0.0048751	AAGE02020466	23179	Stegomyia aegypti	Aedes aegypti
AAGE02018971 contig	255	1	0.00486883	AAGE02018971	52374	Stegomyia aegypti	Aedes aegypti
AAGE02016008 contig	315	2	0.00486517	AAGE02016008	64746	Stegomyia aegypti	Aedes aegypti
AAGE02022287 contig	334	1	0.0048617	AAGE02022287	69520	Stegomyia aegypti	Aedes aegypti
AAGE02022308 contig	168	1	0.00483439	AAGE02022308	34747	Stegomyia aegypti	Aedes aegypti
AAGE02004117 contig	471	2	0.00483384	AAGE02004117	97438	Stegomyia aegypti	Aedes aegypti
AAGE02023106 contig	260	1	0.00482276	AAGE02023106	53911	Stegomyia aegypti	Aedes aegypti
AAGE02017207 contig	280	2	0.00482006	AAGE02017207	58296	Stegomyia aegypti	Aedes aegypti
AAGE02008358 contig	252	1	0.00481541	AAGE02008358	52332	Stegomyia aegypti	Aedes aegypti
AAGE02010619 contig	272	1	0.00481373	AAGE02010619	56505	Stegomyia aegypti	Aedes aegypti
AAGE02008235 contig	149	2	0.00480494	AAGE02008235	31426	Stegomyia aegypti	Aedes aegypti
AAGE02034431 contig	37	1	0.0047971	AAGE02034431	7712	Stegomyia aegypti	Aedes aegypti
AAGE02013599 contig	296	2	0.00478592	AAGE02013599	62266	Stegomyia aegypti	Aedes aegypti
AAGE02006957 contig	512	2	0.00477143	AAGE02006957	107515	Stegomyia aegypti	Aedes aegypti
AAGE02007973 contig	251	1	0.00474543	AAGE02007973	52893	Stegomyia aegypti	Aedes aegypti
AAGE02025563 contig	90	1	0.00473446	AAGE02025563	19432	Stegomyia aegypti	Aedes aegypti
AAGE02028900 contig	261	1	0.00473317	AAGE02028900	55354	Stegomyia aegypti	Aedes aegypti
AAGE02013624 contig	283	2	0.00473239	AAGE02013624	60010	Stegomyia aegypti	Aedes aegypti
AAGE02004257 contig	287	1	0.00473202	AAGE02004257	60862	Stegomyia aegypti	Aedes aegypti
AAGE02014183 contig	291	1	0.00472817	AAGE02014183	61542	Stegomyia aegypti	Aedes aegypti
AAGE02000107 contig	316	4	0.00472752	AAGE02000107	85457	Stegomyia aegypti	Aedes aegypti
AAGE02028441 contig	188	1	0.00472748	AAGE02028441	39979	Stegomyia aegypti	Aedes aegypti
AAGE02003332 contig	138	1	0.0047054	AAGE02003332	29328	Stegomyia aegypti	Aedes aegypti
AAGE02003633 contig	171	1	0.00470038	AAGE02003633	36380	Stegomyia aegypti	Aedes aegypti
AAGE02005242 contig	102	3	0.00469388	AAGE02005242	34300	Stegomyia aegypti	Aedes aegypti
AAGE02022649 contig	278	2	0.00468593	AAGE02022649	59539	Stegomyia aegypti	Aedes aegypti
AAGE02000526 contig	259	1	0.00468448	AAGE02000526	55288	Stegomyia aegypti	Aedes aegypti
AAGE02012433 contig	256	1	0.00468298	AAGE02012433	54666	Stegomyia aegypti	Aedes aegypti
AAGE02022549 contig	322	4	0.00468288	AAGE02022549	100149	Stegomyia aegypti	Aedes aegypti
AAGE02004416 contig	255	1	0.0046693	AAGE02004416	54612	Stegomyia aegypti	Aedes aegypti
AAGE02009774 contig	128	1	0.00466608	AAGE02009774	27432	Stegomyia aegypti	Aedes aegypti
AAGE02011313 contig	70	1	0.00466583	AAGE02011313	15217	Stegomyia aegypti	Aedes aegypti
AAGE02001139 contig	313	2	0.00466565	AAGE02001139	67086	Stegomyia aegypti	Aedes aegypti
AAGE02026001 contig	331	1	0.00466175	AAGE02026001	72075	Stegomyia aegypti	Aedes aegypti
AAGE02010594 contig	75	3	0.00465809	AAGE02010594	47659	Stegomyia aegypti	Aedes aegypti
AAGE02003978 contig	498	5	0.00465031	AAGE02003978	153108	Stegomyia aegypti	Aedes aegypti
AAGE02023611 contig	133	4	0.00464563	AAGE02023611	60487	Stegomyia aegypti	Aedes aegypti
AAGE02002966 contig	156	2	0.00464189	AAGE02002966	44162	Stegomyia aegypti	Aedes aegypti
AAGE02003263 contig	209	1	0.00463805	AAGE02003263	45062	Stegomyia aegypti	Aedes aegypti
AAGE02015843 contig	272	1	0.00463639	AAGE02015843	58882	Stegomyia aegypti	Aedes aegypti
AAGE02010225 contig	279	1	0.00463578	AAGE02010225	60184	Stegomyia aegypti	Aedes aegypti
AAGE02019968 contig	143	2	0.00463392	AAGE02019968	31290	Stegomyia aegypti	Aedes aegypti
AAGE02014538 contig	277	1	0.00462237	AAGE02014538	59925	Stegomyia aegypti	Aedes aegypti
AAGE02013476 contig	212	1	0.00462115	AAGE02013476	45876	Stegomyia aegypti	Aedes aegypti
AAGE02026166 contig	81	1	0.00461775	AAGE02026166	17541	Stegomyia aegypti	Aedes aegypti
AAGE02014655 contig	135	1	0.0046116	AAGE02014655	29274	Stegomyia aegypti	Aedes aegypti
AAGE02013292 contig	638	14	0.0046045	AAGE02013292	289934	Stegomyia aegypti	Aedes aegypti
AAGE02017010 contig	246	1	0.00459543	AAGE02017010	53744	Stegomyia aegypti	Aedes aegypti
AAGE02001244 contig	228	1	0.00458514	AAGE02001244	50157	Stegomyia aegypti	Aedes aegypti
AAGE02001743 contig	261	1	0.00457205	AAGE02001743	57086	Stegomyia aegypti	Aedes aegypti
AAGE02007751 contig	241	2	0.00457002	AAGE02007751	52735	Stegomyia aegypti	Aedes aegypti
AAGE02033407 contig	35	1	0.00456114	AAGE02033407	8112	Stegomyia aegypti	Aedes aegypti
AAGE02000758 contig	249	1	0.00455985	AAGE02000758	54607	Stegomyia aegypti	Aedes aegypti
AAGE02006299 contig	258	1	0.00455726	AAGE02006299	56613	Stegomyia aegypti	Aedes aegypti
AAGE02027581 contig	208	3	0.0045555	AAGE02027581	73753	Stegomyia aegypti	Aedes aegypti
AAGE02010496 contig	258	1	0.00454594	AAGE02010496	56754	Stegomyia aegypti	Aedes aegypti
AAGE02003022 contig	342	3	0.00454168	AAGE02003022	103482	Stegomyia aegypti	Aedes aegypti
AAGE02017290 contig	162	1	0.00454138	AAGE02017290	35672	Stegomyia aegypti	Aedes aegypti
AAGE02009418 contig	265	2	0.00453496	AAGE02009418	120398	Stegomyia aegypti	Aedes aegypti
AAGE02022149 contig	386	3	0.00453405	AAGE02022149	111159	Stegomyia aegypti	Aedes aegypti
AAGE02022132 contig	253	1	0.00453113	AAGE02022132	55836	Stegomyia aegypti	Aedes aegypti
AAGE02012474 contig	112	2	0.00452571	AAGE02012474	49493	Stegomyia aegypti	Aedes aegypti
AAGE02007007 contig	424	2	0.00452571	AAGE02007007	93684	Stegomyia aegypti	Aedes aegypti
AAGE02015244 contig	263	1	0.00452489	AAGE02015244	58123	Stegomyia aegypti	Aedes aegypti
AAGE02006441 contig	121	1	0.00451897	AAGE02006441	26776	Stegomyia aegypti	Aedes aegypti
AAGE02019217 contig	175	1	0.00451508	AAGE02019217	38759	Stegomyia aegypti	Aedes aegypti
AAGE02000001 contig	91	1	0.00451344	AAGE02000001	20162	Stegomyia aegypti	Aedes aegypti
AAGE02003357 contig	459	3	0.00451141	AAGE02003357	101738	Stegomyia aegypti	Aedes aegypti
AAGE02007626 contig	263	1	0.0044995	AAGE02007626	58451	Stegomyia aegypti	Aedes aegypti
AAGE02025549 contig	117	1	0.00449691	AAGE02025549	26684	Stegomyia aegypti	Aedes aegypti
AAGE02024519 contig	255	1	0.00449426	AAGE02024519	56738	Stegomyia aegypti	Aedes aegypti
AAGE02021904 contig	252	1	0.0044939	AAGE02021904	56076	Stegomyia aegypti	Aedes aegypti
AAGE02009190 contig	579	4	0.00448541	AAGE02009190	153832	Stegomyia aegypti	Aedes aegypti
AAGE02011925 contig	259	3	0.00448508	AAGE02011925	58192	Stegomyia aegypti	Aedes aegypti
AAGE02026692 contig	56	2	0.00447749	AAGE02026692	25014	Stegomyia aegypti	Aedes aegypti
AAGE02023421 contig	229	1	0.00447607	AAGE02023421	51161	Stegomyia aegypti	Aedes aegypti
AAGE02016552 contig	147	1	0.00445135	AAGE02016552	33473	Stegomyia aegypti	Aedes aegypti
AAGE02033798 contig	51	1	0.00445065	AAGE02033798	11459	Stegomyia aegypti	Aedes aegypti
AAGE02003624 contig	264	1	0.00444489	AAGE02003624	59393	Stegomyia aegypti	Aedes aegypti
AAGE02023707 contig	204	2	0.0044429	AAGE02023707	45916	Stegomyia aegypti	Aedes aegypti
AAGE02019388 contig	371	2	0.00444248	AAGE02019388	83508	Stegomyia aegypti	Aedes aegypti
AAGE02029223 contig	152	1	0.0044362	AAGE02029223	34489	Stegomyia aegypti	Aedes aegypti
AAGE02026508 contig	68	1	0.00443488	AAGE02026508	15333	Stegomyia aegypti	Aedes aegypti
AAGE02013829 contig	290	4	0.0044305	AAGE02013829	75838	Stegomyia aegypti	Aedes aegypti
AAGE02002092 contig	94	1	0.00442684	AAGE02002092	21460	Stegomyia aegypti	Aedes aegypti
AAGE02030109 contig	84	1	0.00440205	AAGE02030109	19082	Stegomyia aegypti	Aedes aegypti
AAGE02008713 contig	84	1	0.00439675	AAGE02008713	19104	Stegomyia aegypti	Aedes aegypti
AAGE02007139 contig	514	2	0.00438877	AAGE02007139	117117	Stegomyia aegypti	Aedes aegypti
AAGE02010682 contig	262	1	0.00438085	AAGE02010682	60034	Stegomyia aegypti	Aedes aegypti
AAGE02011164 contig	76	2	0.00437988	AAGE02011164	31736	Stegomyia aegypti	Aedes aegypti
AAGE02017684 contig	436	3	0.00437883	AAGE02017684	99568	Stegomyia aegypti	Aedes aegypti
AAGE02029757 contig	150	1	0.00437828	AAGE02029757	34260	Stegomyia aegypti	Aedes aegypti
AAGE02010305 contig	261	1	0.00437083	AAGE02010305	59714	Stegomyia aegypti	Aedes aegypti
AAGE02024086 contig	268	1	0.0043705	AAGE02024086	61548	Stegomyia aegypti	Aedes aegypti
AAGE02028277 contig	187	1	0.00436762	AAGE02028277	43273	Stegomyia aegypti	Aedes aegypti
AAGE02000406 contig	28	1	0.00436545	AAGE02000406	6414	Stegomyia aegypti	Aedes aegypti
AAGE02018847 contig	89	2	0.00436405	AAGE02018847	31621	Stegomyia aegypti	Aedes aegypti
AAGE02017840 contig	31	1	0.00436312	AAGE02017840	7105	Stegomyia aegypti	Aedes aegypti
AAGE02004132 contig	553	4	0.00436191	AAGE02004132	128154	Stegomyia aegypti	Aedes aegypti
AAGE02000755 contig	280	1	0.00435527	AAGE02000755	64288	Stegomyia aegypti	Aedes aegypti
AAGE02003985 contig	144	1	0.0043544	AAGE02003985	33070	Stegomyia aegypti	Aedes aegypti
AAGE02013773 contig	257	2	0.00434805	AAGE02013773	59103	Stegomyia aegypti	Aedes aegypti
AAGE02025431 contig	576	3	0.00433114	AAGE02025431	133676	Stegomyia aegypti	Aedes aegypti
AAGE02009102 contig	162	1	0.00432492	AAGE02009102	38151	Stegomyia aegypti	Aedes aegypti
AAGE02000258 contig	543	3	0.00432381	AAGE02000258	125812	Stegomyia aegypti	Aedes aegypti
AAGE02012785 contig	126	2	0.00432207	AAGE02012785	41184	Stegomyia aegypti	Aedes aegypti
AAGE02013850 contig	265	1	0.00432141	AAGE02013850	61553	Stegomyia aegypti	Aedes aegypti
AAGE02006780 contig	128	3	0.00432088	AAGE02006780	89565	Stegomyia aegypti	Aedes aegypti
AAGE02014786 contig	227	1	0.00431502	AAGE02014786	52607	Stegomyia aegypti	Aedes aegypti
AAGE02006136 contig	217	2	0.00430948	AAGE02006136	99780	Stegomyia aegypti	Aedes aegypti
AAGE02005472 contig	128	1	0.00430904	AAGE02005472	29704	Stegomyia aegypti	Aedes aegypti
AAGE02007035 contig	242	1	0.00430039	AAGE02007035	56274	Stegomyia aegypti	Aedes aegypti
AAGE02025105 contig	174	1	0.0042963	AAGE02025105	40500	Stegomyia aegypti	Aedes aegypti
AAGE02001417 contig	368	2	0.0042944	AAGE02001417	85692	Stegomyia aegypti	Aedes aegypti
AAGE02002375 contig	195	1	0.00428826	AAGE02002375	45473	Stegomyia aegypti	Aedes aegypti
AAGE02010721 contig	330	2	0.00427638	AAGE02010721	77168	Stegomyia aegypti	Aedes aegypti
AAGE02028225 contig	178	1	0.00427412	AAGE02028225	41646	Stegomyia aegypti	Aedes aegypti
AAGE02028809 contig	241	2	0.00427305	AAGE02028809	56866	Stegomyia aegypti	Aedes aegypti
AAGE02017090 contig	121	1	0.00427034	AAGE02017090	28335	Stegomyia aegypti	Aedes aegypti
AAGE02015431 contig	95	1	0.00426894	AAGE02015431	22488	Stegomyia aegypti	Aedes aegypti
AAGE02002780 contig	91	1	0.00426769	AAGE02002780	21323	Stegomyia aegypti	Aedes aegypti
AAGE02017587 contig	106	1	0.00426628	AAGE02017587	24846	Stegomyia aegypti	Aedes aegypti
AAGE02018992 contig	148	1	0.00424982	AAGE02018992	34824	Stegomyia aegypti	Aedes aegypti
AAGE02011401 contig	160	1	0.00424668	AAGE02011401	37910	Stegomyia aegypti	Aedes aegypti
AAGE02019018 contig	255	1	0.00422731	AAGE02019018	60318	Stegomyia aegypti	Aedes aegypti
AAGE02010651 contig	561	4	0.00422627	AAGE02010651	189528	Stegomyia aegypti	Aedes aegypti
AAGE02011881 contig	292	1	0.00422185	AAGE02011881	69164	Stegomyia aegypti	Aedes aegypti
AAGE02012451 contig	431	3	0.00422113	AAGE02012451	115362	Stegomyia aegypti	Aedes aegypti
AAGE02004582 contig	228	1	0.0042191	AAGE02004582	54751	Stegomyia aegypti	Aedes aegypti
AAGE02005344 contig	279	1	0.00421871	AAGE02005344	66134	Stegomyia aegypti	Aedes aegypti
AAGE02016377 contig	53	1	0.0042184	AAGE02016377	12561	Stegomyia aegypti	Aedes aegypti
AAGE02011894 contig	281	1	0.00421355	AAGE02011894	66925	Stegomyia aegypti	Aedes aegypti
AAGE02008155 contig	271	1	0.00421246	AAGE02008155	64333	Stegomyia aegypti	Aedes aegypti
AAGE02008255 contig	177	1	0.00420777	AAGE02008255	42065	Stegomyia aegypti	Aedes aegypti
AAGE02000376 contig	241	2	0.00420315	AAGE02000376	57338	Stegomyia aegypti	Aedes aegypti
AAGE02023057 contig	301	3	0.00420265	AAGE02023057	112548	Stegomyia aegypti	Aedes aegypti
AAGE02016520 contig	257	2	0.00419708	AAGE02016520	61232	Stegomyia aegypti	Aedes aegypti
AAGE02028274 contig	112	1	0.00419491	AAGE02028274	26699	Stegomyia aegypti	Aedes aegypti
AAGE02018765 contig	242	1	0.00419327	AAGE02018765	57949	Stegomyia aegypti	Aedes aegypti
AAGE02023472 contig	582	4	0.00419294	AAGE02023472	190320	Stegomyia aegypti	Aedes aegypti
AAGE02014381 contig	234	1	0.00419095	AAGE02014381	56789	Stegomyia aegypti	Aedes aegypti
AAGE02011552 contig	264	2	0.00418456	AAGE02011552	63089	Stegomyia aegypti	Aedes aegypti
AAGE02000394 contig	809	5	0.00417772	AAGE02000394	196039	Stegomyia aegypti	Aedes aegypti
AAGE02022564 contig	242	1	0.00417753	AAGE02022564	57929	Stegomyia aegypti	Aedes aegypti
AAGE02006435 contig	117	1	0.00417678	AAGE02006435	28012	Stegomyia aegypti	Aedes aegypti
AAGE02002667 contig	413	2	0.00417387	AAGE02002667	98949	Stegomyia aegypti	Aedes aegypti
AAGE02012085 contig	245	1	0.00417007	AAGE02012085	58752	Stegomyia aegypti	Aedes aegypti
AAGE02003228 contig	198	1	0.00416868	AAGE02003228	47497	Stegomyia aegypti	Aedes aegypti
AAGE02003010 contig	270	1	0.00416622	AAGE02003010	64807	Stegomyia aegypti	Aedes aegypti
AAGE02029978 contig	203	1	0.00415447	AAGE02029978	48860	Stegomyia aegypti	Aedes aegypti
AAGE02004981 contig	485	2	0.00415354	AAGE02004981	116766	Stegomyia aegypti	Aedes aegypti
AAGE02003510 contig	267	1	0.00415105	AAGE02003510	64320	Stegomyia aegypti	Aedes aegypti
AAGE02010424 contig	302	3	0.00415018	AAGE02010424	103610	Stegomyia aegypti	Aedes aegypti
AAGE02017613 contig	481	2	0.00414988	AAGE02017613	115906	Stegomyia aegypti	Aedes aegypti
AAGE02022604 contig	80	1	0.00414895	AAGE02022604	19282	Stegomyia aegypti	Aedes aegypti
AAGE02011549 contig	253	1	0.00414788	AAGE02011549	60995	Stegomyia aegypti	Aedes aegypti
AAGE02002963 contig	437	4	0.00414063	AAGE02002963	142727	Stegomyia aegypti	Aedes aegypti
AAGE02034225 contig	35	1	0.00414005	AAGE02034225	8453	Stegomyia aegypti	Aedes aegypti
AAGE02004375 contig	388	3	0.00413823	AAGE02004375	93760	Stegomyia aegypti	Aedes aegypti
AAGE02029575 contig	165	1	0.00413419	AAGE02029575	40153	Stegomyia aegypti	Aedes aegypti
AAGE02028423 contig	110	1	0.00412727	AAGE02028423	26651	Stegomyia aegypti	Aedes aegypti
AAGE02020699 contig	116	1	0.00412248	AAGE02020699	28381	Stegomyia aegypti	Aedes aegypti
AAGE02016244 contig	46	1	0.00412172	AAGE02016244	11403	Stegomyia aegypti	Aedes aegypti
AAGE02005722 contig	243	1	0.00411976	AAGE02005722	58984	Stegomyia aegypti	Aedes aegypti
AAGE02004328 contig	85	1	0.00411912	AAGE02004328	21121	Stegomyia aegypti	Aedes aegypti
AAGE02025842 contig	545	4	0.00411291	AAGE02025842	191589	Stegomyia aegypti	Aedes aegypti
AAGE02027902 contig	110	1	0.00411138	AAGE02027902	26755	Stegomyia aegypti	Aedes aegypti
AAGE02028946 contig	246	1	0.00410995	AAGE02028946	60098	Stegomyia aegypti	Aedes aegypti
AAGE02009537 contig	452	4	0.00410984	AAGE02009537	109980	Stegomyia aegypti	Aedes aegypti
AAGE02016084 contig	179	2	0.00410975	AAGE02016084	43555	Stegomyia aegypti	Aedes aegypti
AAGE02023338 contig	345	2	0.00410949	AAGE02023338	83952	Stegomyia aegypti	Aedes aegypti
AAGE02002238 contig	102	2	0.00410562	AAGE02002238	49688	Stegomyia aegypti	Aedes aegypti
AAGE02025281 contig	398	4	0.00410249	AAGE02025281	104326	Stegomyia aegypti	Aedes aegypti
AAGE02028005 contig	180	1	0.00410228	AAGE02028005	43878	Stegomyia aegypti	Aedes aegypti
AAGE02004377 contig	146	1	0.00410101	AAGE02004377	35601	Stegomyia aegypti	Aedes aegypti
AAGE02005842 contig	113	1	0.00409925	AAGE02005842	27566	Stegomyia aegypti	Aedes aegypti
AAGE02027725 contig	137	1	0.0040975	AAGE02027725	33435	Stegomyia aegypti	Aedes aegypti
AAGE02013941 contig	287	3	0.00409655	AAGE02013941	81287	Stegomyia aegypti	Aedes aegypti
AAGE02019247 contig	57	1	0.00408537	AAGE02019247	14197	Stegomyia aegypti	Aedes aegypti
AAGE02018499 contig	209	1	0.00408368	AAGE02018499	51914	Stegomyia aegypti	Aedes aegypti
AAGE02021000 contig	302	2	0.00407918	AAGE02021000	99775	Stegomyia aegypti	Aedes aegypti
AAGE02003892 contig	412	2	0.00407776	AAGE02003892	101281	Stegomyia aegypti	Aedes aegypti
AAGE02003913 contig	81	1	0.0040679	AAGE02003913	19912	Stegomyia aegypti	Aedes aegypti
AAGE02019427 contig	434	4	0.00406288	AAGE02019427	114943	Stegomyia aegypti	Aedes aegypti
AAGE02016430 contig	325	3	0.00406135	AAGE02016430	88147	Stegomyia aegypti	Aedes aegypti
AAGE02030850 contig	73	1	0.00405849	AAGE02030850	17987	Stegomyia aegypti	Aedes aegypti
AAGE02018391 contig	886	7	0.00405728	AAGE02018391	250409	Stegomyia aegypti	Aedes aegypti
AAGE02015326 contig	482	2	0.00405342	AAGE02015326	118906	Stegomyia aegypti	Aedes aegypti
AAGE02029998 contig	168	1	0.00405249	AAGE02029998	41456	Stegomyia aegypti	Aedes aegypti
AAGE02013553 contig	266	1	0.0040513	AAGE02013553	65658	Stegomyia aegypti	Aedes aegypti
AAGE02022803 contig	274	3	0.00404934	AAGE02022803	172124	Stegomyia aegypti	Aedes aegypti
AAGE02016097 contig	113	1	0.00403312	AAGE02016097	28018	Stegomyia aegypti	Aedes aegypti
AAGE02000005 contig	615	5	0.00402453	AAGE02000005	204496	Stegomyia aegypti	Aedes aegypti
AAGE02002172 contig	108	1	0.0040234	AAGE02002172	26843	Stegomyia aegypti	Aedes aegypti
AAGE02019439 contig	104	2	0.00402002	AAGE02019439	51741	Stegomyia aegypti	Aedes aegypti
AAGE02008475 contig	833	9	0.00400885	AAGE02008475	300082	Stegomyia aegypti	Aedes aegypti
AAGE02021219 contig	265	1	0.00400006	AAGE02021219	66248	Stegomyia aegypti	Aedes aegypti
AAGE02009214 contig	197	1	0.00398984	AAGE02009214	49626	Stegomyia aegypti	Aedes aegypti
AAGE02025573 contig	532	2	0.00398636	AAGE02025573	133455	Stegomyia aegypti	Aedes aegypti
AAGE02019141 contig	161	1	0.00398475	AAGE02019141	40655	Stegomyia aegypti	Aedes aegypti
AAGE02009998 contig	458	2	0.00398226	AAGE02009998	115009	Stegomyia aegypti	Aedes aegypti
AAGE02022563 contig	156	1	0.0039804	AAGE02022563	39192	Stegomyia aegypti	Aedes aegypti
AAGE02029999 contig	148	2	0.0039794	AAGE02029999	74383	Stegomyia aegypti	Aedes aegypti
AAGE02009292 contig	93	1	0.00397833	AAGE02009292	23626	Stegomyia aegypti	Aedes aegypti
AAGE02009766 contig	275	2	0.00397767	AAGE02009766	138272	Stegomyia aegypti	Aedes aegypti
AAGE02030160 contig	190	1	0.00397536	AAGE02030160	48046	Stegomyia aegypti	Aedes aegypti
AAGE02016124 contig	558	4	0.00396594	AAGE02016124	140698	Stegomyia aegypti	Aedes aegypti
AAGE02010954 contig	147	1	0.0039659	AAGE02010954	37066	Stegomyia aegypti	Aedes aegypti
AAGE02003450 contig	119	5	0.00395933	AAGE02003450	150278	Stegomyia aegypti	Aedes aegypti
AAGE02018042 contig	162	1	0.00395875	AAGE02018042	40922	Stegomyia aegypti	Aedes aegypti
AAGE02021811 contig	275	1	0.00395354	AAGE02021811	69558	Stegomyia aegypti	Aedes aegypti
AAGE02010882 contig	364	3	0.00394228	AAGE02010882	106787	Stegomyia aegypti	Aedes aegypti
AAGE02002060 contig	234	2	0.00393684	AAGE02002060	118877	Stegomyia aegypti	Aedes aegypti
AAGE02016460 contig	278	1	0.00393046	AAGE02016460	70984	Stegomyia aegypti	Aedes aegypti
AAGE02011161 contig	113	2	0.00392177	AAGE02011161	59667	Stegomyia aegypti	Aedes aegypti
AAGE02014426 contig	609	6	0.00391888	AAGE02014426	175303	Stegomyia aegypti	Aedes aegypti
AAGE02022504 contig	88	1	0.00391007	AAGE02022504	22506	Stegomyia aegypti	Aedes aegypti
AAGE02010801 contig	247	1	0.00390934	AAGE02010801	63182	Stegomyia aegypti	Aedes aegypti
AAGE02007534 contig	220	2	0.00390106	AAGE02007534	56395	Stegomyia aegypti	Aedes aegypti
AAGE02012146 contig	284	1	0.00390076	AAGE02012146	73319	Stegomyia aegypti	Aedes aegypti
AAGE02005671 contig	853	5	0.00389612	AAGE02005671	218935	Stegomyia aegypti	Aedes aegypti
AAGE02006339 contig	90	1	0.00387297	AAGE02006339	23238	Stegomyia aegypti	Aedes aegypti
AAGE02010443 contig	208	1	0.00387027	AAGE02010443	53743	Stegomyia aegypti	Aedes aegypti
AAGE02004275 contig	283	3	0.00386876	AAGE02004275	108045	Stegomyia aegypti	Aedes aegypti
AAGE02025674 contig	397	2	0.00386533	AAGE02025674	102707	Stegomyia aegypti	Aedes aegypti
AAGE02031616 contig	35	2	0.00386037	AAGE02031616	18132	Stegomyia aegypti	Aedes aegypti
AAGE02033109 contig	77	1	0.00385926	AAGE02033109	19947	Stegomyia aegypti	Aedes aegypti
AAGE02007596 contig	537	3	0.00385154	AAGE02007596	140718	Stegomyia aegypti	Aedes aegypti
AAGE02008876 contig	261	1	0.00383332	AAGE02008876	68345	Stegomyia aegypti	Aedes aegypti
AAGE02019827 contig	193	1	0.00382534	AAGE02019827	50453	Stegomyia aegypti	Aedes aegypti
AAGE02012304 contig	181	1	0.00382195	AAGE02012304	47358	Stegomyia aegypti	Aedes aegypti
AAGE02005363 contig	443	4	0.0038166	AAGE02005363	116070	Stegomyia aegypti	Aedes aegypti
AAGE02019878 contig	45	1	0.00381518	AAGE02019878	11795	Stegomyia aegypti	Aedes aegypti
AAGE02000201 contig	435	3	0.00380777	AAGE02000201	114240	Stegomyia aegypti	Aedes aegypti
AAGE02015745 contig	317	1	0.00380747	AAGE02015745	83518	Stegomyia aegypti	Aedes aegypti
AAGE02012189 contig	631	5	0.00379315	AAGE02012189	167406	Stegomyia aegypti	Aedes aegypti
AAGE02002116 contig	136	1	0.00379094	AAGE02002116	35875	Stegomyia aegypti	Aedes aegypti
AAGE02023810 contig	261	1	0.00378629	AAGE02023810	68933	Stegomyia aegypti	Aedes aegypti
AAGE02018081 contig	499	3	0.00378331	AAGE02018081	199032	Stegomyia aegypti	Aedes aegypti
AAGE02023058 contig	64	1	0.00378251	AAGE02023058	16920	Stegomyia aegypti	Aedes aegypti
AAGE02001781 contig	230	1	0.00378211	AAGE02001781	61075	Stegomyia aegypti	Aedes aegypti
AAGE02024159 contig	384	2	0.00378146	AAGE02024159	101548	Stegomyia aegypti	Aedes aegypti
AAGE02002637 contig	233	1	0.00377311	AAGE02002637	64137	Stegomyia aegypti	Aedes aegypti
AAGE02001195 contig	128	1	0.00377047	AAGE02001195	33948	Stegomyia aegypti	Aedes aegypti
AAGE02004585 contig	312	2	0.00376999	AAGE02004585	83024	Stegomyia aegypti	Aedes aegypti
AAGE02007267 contig	261	1	0.00376146	AAGE02007267	69386	Stegomyia aegypti	Aedes aegypti
AAGE02027452 contig	50	1	0.00375601	AAGE02027452	13312	Stegomyia aegypti	Aedes aegypti
AAGE02025730 contig	151	2	0.00375568	AAGE02025730	40472	Stegomyia aegypti	Aedes aegypti
AAGE02012553 contig	127	1	0.00375451	AAGE02012553	33826	Stegomyia aegypti	Aedes aegypti
AAGE02018199 contig	242	1	0.0037524	AAGE02018199	64490	Stegomyia aegypti	Aedes aegypti
AAGE02020418 contig	174	1	0.0037483	AAGE02020418	46421	Stegomyia aegypti	Aedes aegypti
AAGE02021809 contig	125	1	0.00374065	AAGE02021809	33684	Stegomyia aegypti	Aedes aegypti
AAGE02006743 contig	288	1	0.00373856	AAGE02006743	77030	Stegomyia aegypti	Aedes aegypti
AAGE02014075 contig	694	4	0.00373615	AAGE02014075	187091	Stegomyia aegypti	Aedes aegypti
AAGE02013828 contig	232	1	0.0037301	AAGE02013828	63001	Stegomyia aegypti	Aedes aegypti
AAGE02016866 contig	250	1	0.00372323	AAGE02016866	67142	Stegomyia aegypti	Aedes aegypti
AAGE02005965 contig	642	4	0.00372255	AAGE02005965	221622	Stegomyia aegypti	Aedes aegypti
AAGE02003363 contig	255	1	0.00372181	AAGE02003363	68515	Stegomyia aegypti	Aedes aegypti
AAGE02002350 contig	318	2	0.00371969	AAGE02002350	85491	Stegomyia aegypti	Aedes aegypti
AAGE02018656 contig	337	4	0.00371862	AAGE02018656	90619	Stegomyia aegypti	Aedes aegypti
AAGE02014876 contig	54	1	0.00371571	AAGE02014876	14802	Stegomyia aegypti	Aedes aegypti
AAGE02007543 contig	124	1	0.0037128	AAGE02007543	33398	Stegomyia aegypti	Aedes aegypti
AAGE02006735 contig	135	1	0.00370706	AAGE02006735	36417	Stegomyia aegypti	Aedes aegypti
AAGE02029318 contig	260	1	0.00370566	AAGE02029318	70163	Stegomyia aegypti	Aedes aegypti
AAGE02007802 contig	347	2	0.00370453	AAGE02007802	93669	Stegomyia aegypti	Aedes aegypti
AAGE02003015 contig	521	3	0.00369291	AAGE02003015	141078	Stegomyia aegypti	Aedes aegypti
AAGE02008422 contig	527	2	0.00368445	AAGE02008422	143305	Stegomyia aegypti	Aedes aegypti
AAGE02016936 contig	135	1	0.00368389	AAGE02016936	36646	Stegomyia aegypti	Aedes aegypti
AAGE02011123 contig	250	2	0.00368381	AAGE02011123	68131	Stegomyia aegypti	Aedes aegypti
AAGE02022418 contig	124	1	0.00368149	AAGE02022418	33682	Stegomyia aegypti	Aedes aegypti
AAGE02026439 contig	510	2	0.00367835	AAGE02026439	139193	Stegomyia aegypti	Aedes aegypti
AAGE02007103 contig	524	2	0.00367714	AAGE02007103	142773	Stegomyia aegypti	Aedes aegypti
AAGE02003556 contig	241	1	0.00367451	AAGE02003556	65587	Stegomyia aegypti	Aedes aegypti
AAGE02022327 contig	253	1	0.00367284	AAGE02022327	68883	Stegomyia aegypti	Aedes aegypti
AAGE02002430 contig	204	1	0.00367058	AAGE02002430	55577	Stegomyia aegypti	Aedes aegypti
AAGE02013591 contig	313	1	0.00366652	AAGE02013591	85367	Stegomyia aegypti	Aedes aegypti
AAGE02000901 contig	200	1	0.00365831	AAGE02000901	54670	Stegomyia aegypti	Aedes aegypti
AAGE02023440 contig	315	2	0.0036568	AAGE02023440	86141	Stegomyia aegypti	Aedes aegypti
AAGE02007549 contig	205	2	0.00365442	AAGE02007549	112193	Stegomyia aegypti	Aedes aegypti
AAGE02033816 contig	41	1	0.00365354	AAGE02033816	11222	Stegomyia aegypti	Aedes aegypti
AAGE02017424 contig	34	1	0.00364768	AAGE02017424	9321	Stegomyia aegypti	Aedes aegypti
AAGE02021628 contig	519	4	0.0036438	AAGE02021628	142707	Stegomyia aegypti	Aedes aegypti
AAGE02022225 contig	164	2	0.00363188	AAGE02022225	45431	Stegomyia aegypti	Aedes aegypti
AAGE02022416 contig	209	1	0.00362813	AAGE02022416	58704	Stegomyia aegypti	Aedes aegypti
AAGE02003568 contig	129	1	0.00362095	AAGE02003568	35626	Stegomyia aegypti	Aedes aegypti
AAGE02019159 contig	222	1	0.00361702	AAGE02019159	61653	Stegomyia aegypti	Aedes aegypti
AAGE02013203 contig	244	1	0.003606	AAGE02013203	67664	Stegomyia aegypti	Aedes aegypti
AAGE02033863 contig	39	1	0.00358588	AAGE02033863	10876	Stegomyia aegypti	Aedes aegypti
AAGE02030968 contig	87	1	0.00358365	AAGE02030968	24556	Stegomyia aegypti	Aedes aegypti
AAGE02007393 contig	229	2	0.00358244	AAGE02007393	63923	Stegomyia aegypti	Aedes aegypti
AAGE02005301 contig	436	2	0.00357619	AAGE02005301	122196	Stegomyia aegypti	Aedes aegypti
AAGE02001875 contig	116	1	0.00357506	AAGE02001875	32447	Stegomyia aegypti	Aedes aegypti
AAGE02020409 contig	102	1	0.00357393	AAGE02020409	28539	Stegomyia aegypti	Aedes aegypti
AAGE02013639 contig	277	1	0.00356876	AAGE02013639	77618	Stegomyia aegypti	Aedes aegypti
AAGE02019838 contig	165	2	0.00356842	AAGE02019838	92478	Stegomyia aegypti	Aedes aegypti
AAGE02001231 contig	191	1	0.00356683	AAGE02001231	53549	Stegomyia aegypti	Aedes aegypti
AAGE02009116 contig	37	2	0.003563	AAGE02009116	20769	Stegomyia aegypti	Aedes aegypti
AAGE02014343 contig	218	1	0.00354949	AAGE02014343	61698	Stegomyia aegypti	Aedes aegypti
AAGE02019724 contig	696	8	0.00354934	AAGE02019724	243989	Stegomyia aegypti	Aedes aegypti
AAGE02017689 contig	257	2	0.00354757	AAGE02017689	72444	Stegomyia aegypti	Aedes aegypti
AAGE02001366 contig	261	1	0.00354196	AAGE02001366	73682	Stegomyia aegypti	Aedes aegypti
AAGE02000730 contig	34	1	0.00353725	AAGE02000730	9612	Stegomyia aegypti	Aedes aegypti
AAGE02010056 contig	268	1	0.00353702	AAGE02010056	75767	Stegomyia aegypti	Aedes aegypti
AAGE02003076 contig	173	1	0.0035366	AAGE02003076	48914	Stegomyia aegypti	Aedes aegypti
AAGE02011930 contig	170	1	0.00353166	AAGE02011930	48135	Stegomyia aegypti	Aedes aegypti
AAGE02012765 contig	220	2	0.00352962	AAGE02012765	62612	Stegomyia aegypti	Aedes aegypti
AAGE02005288 contig	404	3	0.00352818	AAGE02005288	114790	Stegomyia aegypti	Aedes aegypti
AAGE02016078 contig	126	1	0.00352576	AAGE02016078	35737	Stegomyia aegypti	Aedes aegypti
AAGE02007839 contig	243	1	0.00352413	AAGE02007839	69237	Stegomyia aegypti	Aedes aegypti
AAGE02007008 contig	172	1	0.00352401	AAGE02007008	48808	Stegomyia aegypti	Aedes aegypti
AAGE02021758 contig	114	1	0.00352134	AAGE02021758	32374	Stegomyia aegypti	Aedes aegypti
AAGE02001081 contig	325	3	0.00351995	AAGE02001081	110511	Stegomyia aegypti	Aedes aegypti
AAGE02006723 contig	105	2	0.00351847	AAGE02006723	59685	Stegomyia aegypti	Aedes aegypti
AAGE02006797 contig	258	1	0.00351669	AAGE02006797	75354	Stegomyia aegypti	Aedes aegypti
AAGE02016525 contig	238	1	0.00351245	AAGE02016525	67759	Stegomyia aegypti	Aedes aegypti
AAGE02011108 contig	236	2	0.00351046	AAGE02011108	85173	Stegomyia aegypti	Aedes aegypti
AAGE02017543 contig	260	1	0.00350433	AAGE02017543	74193	Stegomyia aegypti	Aedes aegypti
AAGE02027672 contig	310	2	0.00350367	AAGE02027672	88764	Stegomyia aegypti	Aedes aegypti
AAGE02028915 contig	133	1	0.00349926	AAGE02028915	38007	Stegomyia aegypti	Aedes aegypti
AAGE02011135 contig	477	2	0.00349862	AAGE02011135	136911	Stegomyia aegypti	Aedes aegypti
AAGE02033693 contig	43	1	0.00349111	AAGE02033693	12317	Stegomyia aegypti	Aedes aegypti
AAGE02010978 contig	182	1	0.00348712	AAGE02010978	52192	Stegomyia aegypti	Aedes aegypti
AAGE02006760 contig	669	3	0.0034845	AAGE02006760	191993	Stegomyia aegypti	Aedes aegypti
AAGE02006915 contig	140	1	0.00347993	AAGE02006915	40518	Stegomyia aegypti	Aedes aegypti
AAGE02010688 contig	252	2	0.00347882	AAGE02010688	148321	Stegomyia aegypti	Aedes aegypti
AAGE02027219 contig	130	1	0.00347204	AAGE02027219	37441	Stegomyia aegypti	Aedes aegypti
AAGE02018243 contig	491	3	0.0034646	AAGE02018243	141718	Stegomyia aegypti	Aedes aegypti
AAGE02024868 contig	121	1	0.00346288	AAGE02024868	34942	Stegomyia aegypti	Aedes aegypti
AAGE02010773 contig	70	1	0.00345833	AAGE02010773	20241	Stegomyia aegypti	Aedes aegypti
AAGE02011785 contig	338	2	0.0034566	AAGE02011785	97779	Stegomyia aegypti	Aedes aegypti
AAGE02005343 contig	350	3	0.00345209	AAGE02005343	123983	Stegomyia aegypti	Aedes aegypti
AAGE02016926 contig	58	1	0.00344971	AAGE02016926	16811	Stegomyia aegypti	Aedes aegypti
AAGE02026641 contig	271	1	0.0034495	AAGE02026641	78562	Stegomyia aegypti	Aedes aegypti
AAGE02002294 contig	204	3	0.00344831	AAGE02002294	102078	Stegomyia aegypti	Aedes aegypti
AAGE02008410 contig	111	2	0.00344684	AAGE02008410	64987	Stegomyia aegypti	Aedes aegypti
AAGE02027589 contig	254	1	0.00344561	AAGE02027589	73717	Stegomyia aegypti	Aedes aegypti
AAGE02016947 contig	336	4	0.00343576	AAGE02016947	97794	Stegomyia aegypti	Aedes aegypti
AAGE02003500 contig	1114	5	0.00343364	AAGE02003500	364619	Stegomyia aegypti	Aedes aegypti
AAGE02014652 contig	66	1	0.00343339	AAGE02014652	19223	Stegomyia aegypti	Aedes aegypti
AAGE02008926 contig	253	1	0.00343158	AAGE02008926	73727	Stegomyia aegypti	Aedes aegypti
AAGE02020504 contig	130	1	0.00342385	AAGE02020504	37969	Stegomyia aegypti	Aedes aegypti
AAGE02000048 contig	494	6	0.00342233	AAGE02000048	176195	Stegomyia aegypti	Aedes aegypti
AAGE02013364 contig	190	1	0.00342207	AAGE02013364	55522	Stegomyia aegypti	Aedes aegypti
AAGE02014976 contig	70	1	0.00341814	AAGE02014976	20479	Stegomyia aegypti	Aedes aegypti
AAGE02010820 contig	163	1	0.00341773	AAGE02010820	47985	Stegomyia aegypti	Aedes aegypti
AAGE02001909 contig	122	1	0.00341278	AAGE02001909	35746	Stegomyia aegypti	Aedes aegypti
AAGE02019589 contig	269	1	0.00341007	AAGE02019589	78884	Stegomyia aegypti	Aedes aegypti
AAGE02016699 contig	114	1	0.00340614	AAGE02016699	33469	Stegomyia aegypti	Aedes aegypti
AAGE02008597 contig	84	1	0.0034055	AAGE02008597	24666	Stegomyia aegypti	Aedes aegypti
AAGE02012875 contig	178	1	0.00340329	AAGE02012875	52890	Stegomyia aegypti	Aedes aegypti
AAGE02012641 contig	51	1	0.0034025	AAGE02012641	14989	Stegomyia aegypti	Aedes aegypti
AAGE02023300 contig	258	1	0.00340203	AAGE02023300	75837	Stegomyia aegypti	Aedes aegypti
AAGE02005156 contig	860	6	0.00339859	AAGE02005156	275986	Stegomyia aegypti	Aedes aegypti
AAGE02008606 contig	245	1	0.00339716	AAGE02008606	72119	Stegomyia aegypti	Aedes aegypti
AAGE02016487 contig	135	3	0.00339675	AAGE02016487	52403	Stegomyia aegypti	Aedes aegypti
AAGE02015025 contig	117	1	0.00339534	AAGE02015025	34459	Stegomyia aegypti	Aedes aegypti
AAGE02016974 contig	212	3	0.00338587	AAGE02016974	106914	Stegomyia aegypti	Aedes aegypti
AAGE02008353 contig	239	1	0.00337905	AAGE02008353	70729	Stegomyia aegypti	Aedes aegypti
AAGE02006252 contig	257	1	0.00337864	AAGE02006252	76066	Stegomyia aegypti	Aedes aegypti
AAGE02006420 contig	243	4	0.00337396	AAGE02006420	100179	Stegomyia aegypti	Aedes aegypti
AAGE02019949 contig	197	1	0.00336942	AAGE02019949	58467	Stegomyia aegypti	Aedes aegypti
AAGE02015777 contig	161	1	0.00336686	AAGE02015777	48116	Stegomyia aegypti	Aedes aegypti
AAGE02009768 contig	55	2	0.00335898	AAGE02009768	32748	Stegomyia aegypti	Aedes aegypti
AAGE02014953 contig	341	2	0.00335871	AAGE02014953	101527	Stegomyia aegypti	Aedes aegypti
AAGE02008404 contig	79	1	0.00335799	AAGE02008404	23526	Stegomyia aegypti	Aedes aegypti
AAGE02004310 contig	241	1	0.00335786	AAGE02004310	71772	Stegomyia aegypti	Aedes aegypti
AAGE02006604 contig	67	1	0.00335436	AAGE02006604	19974	Stegomyia aegypti	Aedes aegypti
AAGE02015032 contig	259	2	0.00335324	AAGE02015032	116900	Stegomyia aegypti	Aedes aegypti
AAGE02020038 contig	690	5	0.00335266	AAGE02020038	207296	Stegomyia aegypti	Aedes aegypti
AAGE02025240 contig	151	1	0.00335198	AAGE02025240	45048	Stegomyia aegypti	Aedes aegypti
AAGE02020840 contig	111	1	0.00335175	AAGE02020840	33117	Stegomyia aegypti	Aedes aegypti
AAGE02020396 contig	116	1	0.00334699	AAGE02020396	34658	Stegomyia aegypti	Aedes aegypti
AAGE02007030 contig	239	2	0.0033461	AAGE02007030	144646	Stegomyia aegypti	Aedes aegypti
AAGE02012006 contig	571	5	0.00334609	AAGE02012006	185581	Stegomyia aegypti	Aedes aegypti
AAGE02004338 contig	391	4	0.00333669	AAGE02004338	157042	Stegomyia aegypti	Aedes aegypti
AAGE02005550 contig	285	1	0.0033262	AAGE02005550	85984	Stegomyia aegypti	Aedes aegypti
AAGE02003239 contig	193	1	0.003317	AAGE02003239	58788	Stegomyia aegypti	Aedes aegypti
AAGE02030244 contig	32	1	0.00331675	AAGE02030244	9648	Stegomyia aegypti	Aedes aegypti
AAGE02017399 contig	126	1	0.00331109	AAGE02017399	38356	Stegomyia aegypti	Aedes aegypti
AAGE02005377 contig	101	1	0.00330909	AAGE02005377	30522	Stegomyia aegypti	Aedes aegypti
AAGE02012447 contig	69	1	0.00329875	AAGE02012447	20917	Stegomyia aegypti	Aedes aegypti
AAGE02025732 contig	332	2	0.00329617	AAGE02025732	100723	Stegomyia aegypti	Aedes aegypti
AAGE02020056 contig	52	1	0.00329552	AAGE02020056	15779	Stegomyia aegypti	Aedes aegypti
AAGE02001486 contig	398	2	0.00329246	AAGE02001486	121185	Stegomyia aegypti	Aedes aegypti
AAGE02009320 contig	175	2	0.00329015	AAGE02009320	53188	Stegomyia aegypti	Aedes aegypti
AAGE02004732 contig	77	2	0.00328772	AAGE02004732	41362	Stegomyia aegypti	Aedes aegypti
AAGE02020541 contig	328	1	0.00328241	AAGE02020541	101448	Stegomyia aegypti	Aedes aegypti
AAGE02011982 contig	278	1	0.00328124	AAGE02011982	84724	Stegomyia aegypti	Aedes aegypti
AAGE02001896 contig	272	1	0.00327648	AAGE02001896	83015	Stegomyia aegypti	Aedes aegypti
AAGE02009071 contig	57	1	0.00327097	AAGE02009071	17426	Stegomyia aegypti	Aedes aegypti
AAGE02016305 contig	158	1	0.00326601	AAGE02016305	48377	Stegomyia aegypti	Aedes aegypti
AAGE02017009 contig	214	2	0.00326361	AAGE02017009	131143	Stegomyia aegypti	Aedes aegypti
AAGE02014761 contig	191	1	0.00326142	AAGE02014761	58870	Stegomyia aegypti	Aedes aegypti
AAGE02016168 contig	227	1	0.00325364	AAGE02016168	69768	Stegomyia aegypti	Aedes aegypti
AAGE02002848 contig	170	1	0.00325305	AAGE02002848	52566	Stegomyia aegypti	Aedes aegypti
AAGE02001052 contig	251	1	0.00325302	AAGE02001052	77159	Stegomyia aegypti	Aedes aegypti
AAGE02020244 contig	63	1	0.00325161	AAGE02020244	19374	Stegomyia aegypti	Aedes aegypti
AAGE02005064 contig	367	3	0.00325052	AAGE02005064	149822	Stegomyia aegypti	Aedes aegypti
AAGE02026642 contig	341	2	0.00324524	AAGE02026642	105077	Stegomyia aegypti	Aedes aegypti
AAGE02028268 contig	56	1	0.00324262	AAGE02028268	17270	Stegomyia aegypti	Aedes aegypti
AAGE02032929 contig	60	1	0.00323642	AAGE02032929	18539	Stegomyia aegypti	Aedes aegypti
AAGE02008718 contig	240	1	0.0032308	AAGE02008718	74285	Stegomyia aegypti	Aedes aegypti
AAGE02021085 contig	139	1	0.0032211	AAGE02021085	43153	Stegomyia aegypti	Aedes aegypti
AAGE02019166 contig	271	1	0.00321933	AAGE02019166	84179	Stegomyia aegypti	Aedes aegypti
AAGE02004829 contig	273	1	0.00321453	AAGE02004829	84927	Stegomyia aegypti	Aedes aegypti
AAGE02029617 contig	271	1	0.00321124	AAGE02029617	84388	Stegomyia aegypti	Aedes aegypti
AAGE02022018 contig	166	1	0.00320897	AAGE02022018	51730	Stegomyia aegypti	Aedes aegypti
AAGE02020767 contig	181	1	0.00320825	AAGE02020767	56417	Stegomyia aegypti	Aedes aegypti
AAGE02001625 contig	248	1	0.00320485	AAGE02001625	79566	Stegomyia aegypti	Aedes aegypti
AAGE02027999 contig	123	1	0.00320071	AAGE02027999	38429	Stegomyia aegypti	Aedes aegypti
AAGE02001675 contig	823	4	0.00320068	AAGE02001675	257445	Stegomyia aegypti	Aedes aegypti
AAGE02027032 contig	394	2	0.00319393	AAGE02027032	123357	Stegomyia aegypti	Aedes aegypti
AAGE02028083 contig	108	1	0.00319243	AAGE02028083	33830	Stegomyia aegypti	Aedes aegypti
AAGE02012246 contig	179	2	0.00318979	AAGE02012246	112850	Stegomyia aegypti	Aedes aegypti
AAGE02020308 contig	113	1	0.00318804	AAGE02020308	35445	Stegomyia aegypti	Aedes aegypti
AAGE02031838 contig	237	2	0.00318638	AAGE02031838	74379	Stegomyia aegypti	Aedes aegypti
AAGE02012568 contig	350	2	0.00318005	AAGE02012568	110061	Stegomyia aegypti	Aedes aegypti
AAGE02006725 contig	157	1	0.00317692	AAGE02006725	49417	Stegomyia aegypti	Aedes aegypti
AAGE02020544 contig	57	1	0.0031769	AAGE02020544	17942	Stegomyia aegypti	Aedes aegypti
AAGE02007345 contig	313	3	0.00317036	AAGE02007345	98725	Stegomyia aegypti	Aedes aegypti
AAGE02012181 contig	234	1	0.00317017	AAGE02012181	73813	Stegomyia aegypti	Aedes aegypti
AAGE02011891 contig	201	1	0.00316451	AAGE02011891	63517	Stegomyia aegypti	Aedes aegypti
AAGE02022382 contig	203	3	0.00316118	AAGE02022382	77819	Stegomyia aegypti	Aedes aegypti
AAGE02001068 contig	301	1	0.00315405	AAGE02001068	95432	Stegomyia aegypti	Aedes aegypti
AAGE02009458 contig	299	2	0.00315066	AAGE02009458	95218	Stegomyia aegypti	Aedes aegypti
AAGE02021899 contig	230	1	0.00314754	AAGE02021899	73073	Stegomyia aegypti	Aedes aegypti
AAGE02020438 contig	133	1	0.00314666	AAGE02020438	42267	Stegomyia aegypti	Aedes aegypti
AAGE02014600 contig	426	2	0.00314165	AAGE02014600	136232	Stegomyia aegypti	Aedes aegypti
AAGE02012851 contig	291	1	0.00313024	AAGE02012851	92962	Stegomyia aegypti	Aedes aegypti
AAGE02009639 contig	349	2	0.00312665	AAGE02009639	111621	Stegomyia aegypti	Aedes aegypti
AAGE02020926 contig	249	1	0.00312155	AAGE02020926	79768	Stegomyia aegypti	Aedes aegypti
AAGE02030835 contig	45	1	0.00311937	AAGE02030835	14426	Stegomyia aegypti	Aedes aegypti
AAGE02026973 contig	279	1	0.00311224	AAGE02026973	89646	Stegomyia aegypti	Aedes aegypti
AAGE02024058 contig	230	1	0.00311023	AAGE02024058	74271	Stegomyia aegypti	Aedes aegypti
AAGE02011340 contig	246	1	0.00310857	AAGE02011340	79135	Stegomyia aegypti	Aedes aegypti
AAGE02008496 contig	125	2	0.00310582	AAGE02008496	80494	Stegomyia aegypti	Aedes aegypti
AAGE02030811 contig	71	1	0.00310396	AAGE02030811	22874	Stegomyia aegypti	Aedes aegypti
AAGE02010428 contig	409	4	0.0031033	AAGE02010428	231687	Stegomyia aegypti	Aedes aegypti
AAGE02001764 contig	436	3	0.00310286	AAGE02001764	140838	Stegomyia aegypti	Aedes aegypti
AAGE02025491 contig	94	1	0.00310211	AAGE02025491	30302	Stegomyia aegypti	Aedes aegypti
AAGE02019736 contig	109	1	0.00310026	AAGE02019736	36124	Stegomyia aegypti	Aedes aegypti
AAGE02022941 contig	250	1	0.00309605	AAGE02022941	81071	Stegomyia aegypti	Aedes aegypti
AAGE02004938 contig	259	1	0.00308449	AAGE02004938	84617	Stegomyia aegypti	Aedes aegypti
AAGE02006281 contig	201	2	0.00307885	AAGE02006281	83148	Stegomyia aegypti	Aedes aegypti
AAGE02010321 contig	127	1	0.00307656	AAGE02010321	41930	Stegomyia aegypti	Aedes aegypti
AAGE02021252 contig	54	1	0.00307255	AAGE02021252	17573	Stegomyia aegypti	Aedes aegypti
AAGE02011777 contig	116	1	0.00307114	AAGE02011777	37771	Stegomyia aegypti	Aedes aegypti
AAGE02026359 contig	285	1	0.00306808	AAGE02026359	92892	Stegomyia aegypti	Aedes aegypti
AAGE02029317 contig	94	1	0.00306808	AAGE02029317	30964	Stegomyia aegypti	Aedes aegypti
AAGE02014974 contig	175	2	0.00306641	AAGE02014974	57070	Stegomyia aegypti	Aedes aegypti
AAGE02018259 contig	210	1	0.00306596	AAGE02018259	68492	Stegomyia aegypti	Aedes aegypti
AAGE02021629 contig	581	3	0.0030604	AAGE02021629	190495	Stegomyia aegypti	Aedes aegypti
AAGE02032333 contig	43	1	0.00306006	AAGE02032333	14052	Stegomyia aegypti	Aedes aegypti
AAGE02013592 contig	242	1	0.00305529	AAGE02013592	79207	Stegomyia aegypti	Aedes aegypti
AAGE02001257 contig	591	3	0.00305477	AAGE02001257	193468	Stegomyia aegypti	Aedes aegypti
AAGE02016908 contig	194	1	0.00305151	AAGE02016908	63571	Stegomyia aegypti	Aedes aegypti
AAGE02018815 contig	424	4	0.00304601	AAGE02018815	158239	Stegomyia aegypti	Aedes aegypti
AAGE02013895 contig	578	3	0.00304525	AAGE02013895	189803	Stegomyia aegypti	Aedes aegypti
AAGE02013526 contig	315	1	0.0030447	AAGE02013526	103784	Stegomyia aegypti	Aedes aegypti
AAGE02011797 contig	142	1	0.00304446	AAGE02011797	47298	Stegomyia aegypti	Aedes aegypti
AAGE02012640 contig	275	2	0.00304412	AAGE02012640	90338	Stegomyia aegypti	Aedes aegypti
AAGE02010233 contig	266	1	0.00304355	AAGE02010233	87398	Stegomyia aegypti	Aedes aegypti
AAGE02010739 contig	198	1	0.00304026	AAGE02010739	65125	Stegomyia aegypti	Aedes aegypti
AAGE02012005 contig	196	1	0.00304022	AAGE02012005	64463	Stegomyia aegypti	Aedes aegypti
AAGE02019620 contig	324	2	0.00303968	AAGE02019620	107247	Stegomyia aegypti	Aedes aegypti
AAGE02024700 contig	163	4	0.00303877	AAGE02024700	94446	Stegomyia aegypti	Aedes aegypti
AAGE02012487 contig	156	1	0.00303561	AAGE02012487	51390	Stegomyia aegypti	Aedes aegypti
AAGE02014255 contig	58	1	0.00303451	AAGE02014255	19443	Stegomyia aegypti	Aedes aegypti
AAGE02003967 contig	528	2	0.00303114	AAGE02003967	174188	Stegomyia aegypti	Aedes aegypti
AAGE02031125 contig	90	1	0.00302765	AAGE02031125	29726	Stegomyia aegypti	Aedes aegypti
AAGE02017271 contig	189	4	0.00302713	AAGE02017271	111657	Stegomyia aegypti	Aedes aegypti
AAGE02007908 contig	210	4	0.00302465	AAGE02007908	118030	Stegomyia aegypti	Aedes aegypti
AAGE02001614 contig	256	1	0.00302297	AAGE02001614	84685	Stegomyia aegypti	Aedes aegypti
AAGE02000093 contig	210	9	0.00301599	AAGE02000093	103113	Stegomyia aegypti	Aedes aegypti
AAGE02032425 contig	47	1	0.00301301	AAGE02032425	15598	Stegomyia aegypti	Aedes aegypti
AAGE02023765 contig	195	1	0.00301042	AAGE02023765	64775	Stegomyia aegypti	Aedes aegypti
AAGE02026672 contig	298	1	0.00300731	AAGE02026672	99091	Stegomyia aegypti	Aedes aegypti
AAGE02018026 contig	262	1	0.00299835	AAGE02018026	87715	Stegomyia aegypti	Aedes aegypti
AAGE02014914 contig	238	1	0.00299612	AAGE02014914	79436	Stegomyia aegypti	Aedes aegypti
AAGE02002693 contig	60	2	0.00299333	AAGE02002693	39421	Stegomyia aegypti	Aedes aegypti
AAGE02016577 contig	535	2	0.00298813	AAGE02016577	179042	Stegomyia aegypti	Aedes aegypti
AAGE02010441 contig	931	4	0.00298719	AAGE02010441	312665	Stegomyia aegypti	Aedes aegypti
AAGE02009787 contig	64	1	0.00298591	AAGE02009787	21434	Stegomyia aegypti	Aedes aegypti
AAGE02012836 contig	245	1	0.00298467	AAGE02012836	82086	Stegomyia aegypti	Aedes aegypti
AAGE02015373 contig	212	1	0.00297799	AAGE02015373	71189	Stegomyia aegypti	Aedes aegypti
AAGE02007593 contig	763	4	0.00297549	AAGE02007593	316923	Stegomyia aegypti	Aedes aegypti
AAGE02014827 contig	250	2	0.0029744	AAGE02014827	84720	Stegomyia aegypti	Aedes aegypti
AAGE02012347 contig	254	1	0.00297095	AAGE02012347	85831	Stegomyia aegypti	Aedes aegypti
AAGE02017242 contig	134	2	0.00296728	AAGE02017242	75487	Stegomyia aegypti	Aedes aegypti
AAGE02008247 contig	126	1	0.00296547	AAGE02008247	42489	Stegomyia aegypti	Aedes aegypti
AAGE02021636 contig	47	1	0.00295749	AAGE02021636	16230	Stegomyia aegypti	Aedes aegypti
AAGE02011218 contig	242	1	0.00295533	AAGE02011218	81886	Stegomyia aegypti	Aedes aegypti
AAGE02030276 contig	329	2	0.00295322	AAGE02030276	111404	Stegomyia aegypti	Aedes aegypti
AAGE02027546 contig	281	1	0.0029401	AAGE02027546	95572	Stegomyia aegypti	Aedes aegypti
AAGE02011781 contig	414	2	0.00293946	AAGE02011781	140839	Stegomyia aegypti	Aedes aegypti
AAGE02000639 contig	181	1	0.00293722	AAGE02000639	61623	Stegomyia aegypti	Aedes aegypti
AAGE02005490 contig	201	1	0.00293581	AAGE02005490	68464	Stegomyia aegypti	Aedes aegypti
AAGE02018838 contig	197	1	0.00293509	AAGE02018838	67119	Stegomyia aegypti	Aedes aegypti
AAGE02031331 contig	161	1	0.00292424	AAGE02031331	55057	Stegomyia aegypti	Aedes aegypti
AAGE02010434 contig	253	1	0.00292117	AAGE02010434	88663	Stegomyia aegypti	Aedes aegypti
AAGE02006142 contig	291	2	0.00291801	AAGE02006142	102465	Stegomyia aegypti	Aedes aegypti
AAGE02013171 contig	100	2	0.00291693	AAGE02013171	47310	Stegomyia aegypti	Aedes aegypti
AAGE02009183 contig	372	5	0.00291261	AAGE02009183	172354	Stegomyia aegypti	Aedes aegypti
AAGE02018875 contig	86	1	0.00291141	AAGE02018875	29538	Stegomyia aegypti	Aedes aegypti
AAGE02016245 contig	448	4	0.00290833	AAGE02016245	208709	Stegomyia aegypti	Aedes aegypti
AAGE02019294 contig	281	1	0.00290632	AAGE02019294	96686	Stegomyia aegypti	Aedes aegypti
AAGE02007594 contig	60	1	0.00290346	AAGE02007594	20665	Stegomyia aegypti	Aedes aegypti
AAGE02025279 contig	259	1	0.0028956	AAGE02025279	89443	Stegomyia aegypti	Aedes aegypti
AAGE02021512 contig	248	1	0.00289263	AAGE02021512	85735	Stegomyia aegypti	Aedes aegypti
AAGE02004855 contig	164	1	0.00288401	AAGE02004855	57211	Stegomyia aegypti	Aedes aegypti
AAGE02019443 contig	485	2	0.00288318	AAGE02019443	168216	Stegomyia aegypti	Aedes aegypti
AAGE02010103 contig	220	1	0.00288019	AAGE02010103	76731	Stegomyia aegypti	Aedes aegypti
AAGE02018399 contig	535	5	0.00287968	AAGE02018399	237872	Stegomyia aegypti	Aedes aegypti
AAGE02000342 contig	254	1	0.00287558	AAGE02000342	88330	Stegomyia aegypti	Aedes aegypti
AAGE02026337 contig	314	2	0.00286742	AAGE02026337	111249	Stegomyia aegypti	Aedes aegypti
AAGE02009155 contig	235	1	0.00286174	AAGE02009155	82118	Stegomyia aegypti	Aedes aegypti
AAGE02002711 contig	524	6	0.00286111	AAGE02002711	242913	Stegomyia aegypti	Aedes aegypti
AAGE02011227 contig	235	3	0.00285934	AAGE02011227	169969	Stegomyia aegypti	Aedes aegypti
AAGE02011439 contig	249	1	0.00285839	AAGE02011439	87112	Stegomyia aegypti	Aedes aegypti
AAGE02023763 contig	187	3	0.00285642	AAGE02023763	106776	Stegomyia aegypti	Aedes aegypti
AAGE02018920 contig	287	1	0.0028524	AAGE02018920	100617	Stegomyia aegypti	Aedes aegypti
AAGE02019333 contig	533	3	0.00285057	AAGE02019333	187682	Stegomyia aegypti	Aedes aegypti
AAGE02027155 contig	101	1	0.00284973	AAGE02027155	35442	Stegomyia aegypti	Aedes aegypti
AAGE02010159 contig	288	2	0.00284948	AAGE02010159	101070	Stegomyia aegypti	Aedes aegypti
AAGE02013282 contig	188	1	0.00284452	AAGE02013282	66795	Stegomyia aegypti	Aedes aegypti
AAGE02006543 contig	240	1	0.00284444	AAGE02006543	86133	Stegomyia aegypti	Aedes aegypti
AAGE02015276 contig	443	4	0.0028424	AAGE02015276	246269	Stegomyia aegypti	Aedes aegypti
AAGE02026468 contig	261	1	0.00283806	AAGE02026468	93726	Stegomyia aegypti	Aedes aegypti
AAGE02014391 contig	189	3	0.0028326	AAGE02014391	85787	Stegomyia aegypti	Aedes aegypti
AAGE02020871 contig	580	4	0.00283218	AAGE02020871	204789	Stegomyia aegypti	Aedes aegypti
AAGE02008663 contig	296	2	0.00283118	AAGE02008663	104550	Stegomyia aegypti	Aedes aegypti
AAGE02006403 contig	291	2	0.00282719	AAGE02006403	102929	Stegomyia aegypti	Aedes aegypti
AAGE02020942 contig	150	2	0.00282502	AAGE02020942	53097	Stegomyia aegypti	Aedes aegypti
AAGE02014518 contig	265	1	0.00282272	AAGE02014518	95291	Stegomyia aegypti	Aedes aegypti
AAGE02025579 contig	254	1	0.00282247	AAGE02025579	89992	Stegomyia aegypti	Aedes aegypti
AAGE02027823 contig	121	1	0.00282097	AAGE02027823	42893	Stegomyia aegypti	Aedes aegypti
AAGE02003646 contig	214	3	0.00282003	AAGE02003646	115237	Stegomyia aegypti	Aedes aegypti
AAGE02005116 contig	487	2	0.00281775	AAGE02005116	175667	Stegomyia aegypti	Aedes aegypti
AAGE02010941 contig	66	4	0.00281534	AAGE02010941	95903	Stegomyia aegypti	Aedes aegypti
AAGE02025808 contig	178	2	0.00281438	AAGE02025808	126493	Stegomyia aegypti	Aedes aegypti
AAGE02002912 contig	76	1	0.00280805	AAGE02002912	27065	Stegomyia aegypti	Aedes aegypti
AAGE02013134 contig	65	1	0.00280233	AAGE02013134	23195	Stegomyia aegypti	Aedes aegypti
AAGE02010183 contig	337	3	0.00280164	AAGE02010183	135273	Stegomyia aegypti	Aedes aegypti
AAGE02002411 contig	85	1	0.00280121	AAGE02002411	30344	Stegomyia aegypti	Aedes aegypti
AAGE02017931 contig	324	7	0.00279911	AAGE02017931	172912	Stegomyia aegypti	Aedes aegypti
AAGE02011023 contig	628	7	0.00279569	AAGE02011023	354828	Stegomyia aegypti	Aedes aegypti
AAGE02008379 contig	262	1	0.00279476	AAGE02008379	93747	Stegomyia aegypti	Aedes aegypti
AAGE02018909 contig	134	1	0.00279474	AAGE02018909	48305	Stegomyia aegypti	Aedes aegypti
AAGE02005705 contig	412	2	0.00278929	AAGE02005705	147708	Stegomyia aegypti	Aedes aegypti
AAGE02005907 contig	82	1	0.00278495	AAGE02005907	29803	Stegomyia aegypti	Aedes aegypti
AAGE02002485 contig	119	1	0.00278493	AAGE02002485	42730	Stegomyia aegypti	Aedes aegypti
AAGE02000894 contig	332	3	0.00278167	AAGE02000894	170754	Stegomyia aegypti	Aedes aegypti
AAGE02022817 contig	110	1	0.00278	AAGE02022817	39928	Stegomyia aegypti	Aedes aegypti
AAGE02024966 contig	254	1	0.00277817	AAGE02024966	91427	Stegomyia aegypti	Aedes aegypti
AAGE02019340 contig	365	2	0.00277693	AAGE02019340	131800	Stegomyia aegypti	Aedes aegypti
AAGE02015997 contig	182	1	0.00277541	AAGE02015997	65576	Stegomyia aegypti	Aedes aegypti
AAGE02004425 contig	236	1	0.00277507	AAGE02004425	85043	Stegomyia aegypti	Aedes aegypti
AAGE02025179 contig	172	1	0.00277214	AAGE02025179	62046	Stegomyia aegypti	Aedes aegypti
AAGE02002088 contig	212	1	0.002772	AAGE02002088	76479	Stegomyia aegypti	Aedes aegypti
AAGE02013568 contig	478	2	0.00276936	AAGE02013568	173324	Stegomyia aegypti	Aedes aegypti
AAGE02010253 contig	89	1	0.00276819	AAGE02010253	32145	Stegomyia aegypti	Aedes aegypti
AAGE02003555 contig	286	1	0.00276705	AAGE02003555	103359	Stegomyia aegypti	Aedes aegypti
AAGE02002940 contig	693	5	0.00276522	AAGE02002940	250610	Stegomyia aegypti	Aedes aegypti
AAGE02008493 contig	214	1	0.00276093	AAGE02008493	77510	Stegomyia aegypti	Aedes aegypti
AAGE02018423 contig	271	1	0.00276057	AAGE02018423	98168	Stegomyia aegypti	Aedes aegypti
AAGE02024796 contig	195	1	0.00276055	AAGE02024796	70638	Stegomyia aegypti	Aedes aegypti
AAGE02020869 contig	163	1	0.00275948	AAGE02020869	59069	Stegomyia aegypti	Aedes aegypti
AAGE02011434 contig	298	3	0.00275919	AAGE02011434	108362	Stegomyia aegypti	Aedes aegypti
AAGE02009773 contig	517	3	0.00275867	AAGE02009773	286003	Stegomyia aegypti	Aedes aegypti
AAGE02030136 contig	39	1	0.0027556	AAGE02030136	14153	Stegomyia aegypti	Aedes aegypti
AAGE02010067 contig	257	2	0.0027501	AAGE02010067	119632	Stegomyia aegypti	Aedes aegypti
AAGE02022622 contig	260	1	0.00274581	AAGE02022622	95050	Stegomyia aegypti	Aedes aegypti
AAGE02024866 contig	137	1	0.00274066	AAGE02024866	49988	Stegomyia aegypti	Aedes aegypti
AAGE02021018 contig	210	2	0.00273672	AAGE02021018	77464	Stegomyia aegypti	Aedes aegypti
AAGE02023335 contig	286	1	0.00273458	AAGE02023335	104951	Stegomyia aegypti	Aedes aegypti
AAGE02010928 contig	59	3	0.00273219	AAGE02010928	60020	Stegomyia aegypti	Aedes aegypti
AAGE02000444 contig	397	2	0.00272797	AAGE02000444	145896	Stegomyia aegypti	Aedes aegypti
AAGE02002979 contig	77	1	0.00272422	AAGE02002979	28265	Stegomyia aegypti	Aedes aegypti
AAGE02018488 contig	96	1	0.00272379	AAGE02018488	35245	Stegomyia aegypti	Aedes aegypti
AAGE02014499 contig	218	2	0.00272204	AAGE02014499	80087	Stegomyia aegypti	Aedes aegypti
AAGE02009582 contig	255	1	0.00271994	AAGE02009582	93752	Stegomyia aegypti	Aedes aegypti
AAGE02019958 contig	188	1	0.00271978	AAGE02019958	69491	Stegomyia aegypti	Aedes aegypti
AAGE02024164 contig	115	1	0.00271893	AAGE02024164	42296	Stegomyia aegypti	Aedes aegypti
AAGE02015902 contig	433	2	0.00271404	AAGE02015902	160643	Stegomyia aegypti	Aedes aegypti
AAGE02014403 contig	652	4	0.00271272	AAGE02014403	240340	Stegomyia aegypti	Aedes aegypti
AAGE02009324 contig	142	1	0.00270858	AAGE02009324	52426	Stegomyia aegypti	Aedes aegypti
AAGE02028812 contig	85	1	0.0027052	AAGE02028812	31421	Stegomyia aegypti	Aedes aegypti
AAGE02010300 contig	209	2	0.00270501	AAGE02010300	77264	Stegomyia aegypti	Aedes aegypti
AAGE02010662 contig	154	1	0.00270351	AAGE02010662	56963	Stegomyia aegypti	Aedes aegypti
AAGE02003856 contig	59	1	0.00270122	AAGE02003856	21842	Stegomyia aegypti	Aedes aegypti
AAGE02004577 contig	151	1	0.00270111	AAGE02004577	55903	Stegomyia aegypti	Aedes aegypti
AAGE02012882 contig	287	2	0.00270044	AAGE02012882	106279	Stegomyia aegypti	Aedes aegypti
AAGE02006692 contig	451	2	0.00270003	AAGE02006692	167775	Stegomyia aegypti	Aedes aegypti
AAGE02012916 contig	173	2	0.00269994	AAGE02012916	128151	Stegomyia aegypti	Aedes aegypti
AAGE02000868 contig	259	2	0.0026981	AAGE02000868	191987	Stegomyia aegypti	Aedes aegypti
AAGE02020401 contig	133	2	0.00269672	AAGE02020401	49690	Stegomyia aegypti	Aedes aegypti
AAGE02001088 contig	67	1	0.00269618	AAGE02001088	24850	Stegomyia aegypti	Aedes aegypti
AAGE02011815 contig	39	1	0.002694	AAGE02011815	15219	Stegomyia aegypti	Aedes aegypti
AAGE02018342 contig	153	1	0.00269376	AAGE02018342	56796	Stegomyia aegypti	Aedes aegypti
AAGE02013837 contig	497	4	0.00269292	AAGE02013837	222435	Stegomyia aegypti	Aedes aegypti
AAGE02001626 contig	218	1	0.00268749	AAGE02001626	83349	Stegomyia aegypti	Aedes aegypti
AAGE02010209 contig	171	3	0.00268726	AAGE02010209	100474	Stegomyia aegypti	Aedes aegypti
AAGE02018439 contig	392	5	0.00268334	AAGE02018439	254534	Stegomyia aegypti	Aedes aegypti
AAGE02011380 contig	395	6	0.00268293	AAGE02011380	202390	Stegomyia aegypti	Aedes aegypti
AAGE02010556 contig	234	1	0.00268093	AAGE02010556	87283	Stegomyia aegypti	Aedes aegypti
AAGE02002768 contig	108	4	0.00267531	AAGE02002768	128583	Stegomyia aegypti	Aedes aegypti
AAGE02014421 contig	135	1	0.00267517	AAGE02014421	50464	Stegomyia aegypti	Aedes aegypti
AAGE02010133 contig	104	1	0.00267153	AAGE02010133	38927	Stegomyia aegypti	Aedes aegypti
AAGE02022840 contig	43	1	0.00266915	AAGE02022840	16110	Stegomyia aegypti	Aedes aegypti
AAGE02007105 contig	599	3	0.00266648	AAGE02007105	226141	Stegomyia aegypti	Aedes aegypti
AAGE02007708 contig	344	2	0.00266598	AAGE02007708	129033	Stegomyia aegypti	Aedes aegypti
AAGE02010180 contig	103	5	0.00266339	AAGE02010180	63450	Stegomyia aegypti	Aedes aegypti
AAGE02016034 contig	236	2	0.0026567	AAGE02016034	175782	Stegomyia aegypti	Aedes aegypti
AAGE02023049 contig	209	1	0.0026541	AAGE02023049	78746	Stegomyia aegypti	Aedes aegypti
AAGE02010146 contig	35	2	0.00265182	AAGE02010146	26396	Stegomyia aegypti	Aedes aegypti
AAGE02021020 contig	444	2	0.0026505	AAGE02021020	167893	Stegomyia aegypti	Aedes aegypti
AAGE02028394 contig	110	1	0.0026492	AAGE02028394	41522	Stegomyia aegypti	Aedes aegypti
AAGE02012895 contig	348	2	0.00264784	AAGE02012895	131428	Stegomyia aegypti	Aedes aegypti
AAGE02018267 contig	45	1	0.00264209	AAGE02018267	17032	Stegomyia aegypti	Aedes aegypti
AAGE02000985 contig	800	8	0.00263865	AAGE02000985	322511	Stegomyia aegypti	Aedes aegypti
AAGE02005365 contig	169	1	0.00263856	AAGE02005365	64050	Stegomyia aegypti	Aedes aegypti
AAGE02015608 contig	145	1	0.00263799	AAGE02015608	54966	Stegomyia aegypti	Aedes aegypti
AAGE02000775 contig	609	4	0.00263799	AAGE02000775	322971	Stegomyia aegypti	Aedes aegypti
AAGE02008142 contig	649	3	0.00263763	AAGE02008142	246054	Stegomyia aegypti	Aedes aegypti
AAGE02010783 contig	170	1	0.00263194	AAGE02010783	64971	Stegomyia aegypti	Aedes aegypti
AAGE02005464 contig	246	1	0.00263116	AAGE02005464	93495	Stegomyia aegypti	Aedes aegypti
AAGE02003632 contig	161	1	0.00263106	AAGE02003632	61192	Stegomyia aegypti	Aedes aegypti
AAGE02007480 contig	167	1	0.00263075	AAGE02007480	63480	Stegomyia aegypti	Aedes aegypti
AAGE02002931 contig	408	2	0.00263053	AAGE02002931	155102	Stegomyia aegypti	Aedes aegypti
AAGE02029778 contig	71	1	0.00262335	AAGE02029778	27826	Stegomyia aegypti	Aedes aegypti
AAGE02011396 contig	258	2	0.00262303	AAGE02011396	196719	Stegomyia aegypti	Aedes aegypti
AAGE02022229 contig	411	5	0.00262218	AAGE02022229	206317	Stegomyia aegypti	Aedes aegypti
AAGE02002063 contig	292	1	0.00261988	AAGE02002063	112211	Stegomyia aegypti	Aedes aegypti
AAGE02014603 contig	250	1	0.00261701	AAGE02014603	95529	Stegomyia aegypti	Aedes aegypti
AAGE02028207 contig	75	2	0.00261634	AAGE02028207	57332	Stegomyia aegypti	Aedes aegypti
AAGE02012346 contig	152	1	0.00261505	AAGE02012346	58125	Stegomyia aegypti	Aedes aegypti
AAGE02005078 contig	131	1	0.00260925	AAGE02005078	50206	Stegomyia aegypti	Aedes aegypti
AAGE02020687 contig	185	1	0.00260854	AAGE02020687	70921	Stegomyia aegypti	Aedes aegypti
AAGE02014833 contig	331	2	0.00260678	AAGE02014833	127360	Stegomyia aegypti	Aedes aegypti
AAGE02013505 contig	249	1	0.00260627	AAGE02013505	95537	Stegomyia aegypti	Aedes aegypti
AAGE02022206 contig	159	1	0.00260472	AAGE02022206	61043	Stegomyia aegypti	Aedes aegypti
AAGE02014137 contig	146	1	0.00260454	AAGE02014137	56056	Stegomyia aegypti	Aedes aegypti
AAGE02027957 contig	93	1	0.00260244	AAGE02027957	36120	Stegomyia aegypti	Aedes aegypti
AAGE02009415 contig	824	4	0.00260191	AAGE02009415	316685	Stegomyia aegypti	Aedes aegypti
AAGE02025154 contig	275	1	0.00260111	AAGE02025154	105724	Stegomyia aegypti	Aedes aegypti
AAGE02011921 contig	124	1	0.00259871	AAGE02011921	47716	Stegomyia aegypti	Aedes aegypti
AAGE02011563 contig	245	1	0.0025976	AAGE02011563	94318	Stegomyia aegypti	Aedes aegypti
AAGE02011094 contig	479	3	0.00259739	AAGE02011094	184415	Stegomyia aegypti	Aedes aegypti
AAGE02009700 contig	513	2	0.0025929	AAGE02009700	198618	Stegomyia aegypti	Aedes aegypti
AAGE02004493 contig	261	1	0.00258354	AAGE02004493	101024	Stegomyia aegypti	Aedes aegypti
AAGE02023692 contig	240	1	0.00257979	AAGE02023692	93031	Stegomyia aegypti	Aedes aegypti
AAGE02011944 contig	425	3	0.00257557	AAGE02011944	165010	Stegomyia aegypti	Aedes aegypti
AAGE02013747 contig	267	1	0.00257377	AAGE02013747	103739	Stegomyia aegypti	Aedes aegypti
AAGE02032889 contig	62	1	0.00257266	AAGE02032889	24877	Stegomyia aegypti	Aedes aegypti
AAGE02030093 contig	76	1	0.00257241	AAGE02030093	29933	Stegomyia aegypti	Aedes aegypti
AAGE02015833 contig	273	1	0.00257033	AAGE02015833	106209	Stegomyia aegypti	Aedes aegypti
AAGE02001428 contig	171	1	0.00256753	AAGE02001428	66601	Stegomyia aegypti	Aedes aegypti
AAGE02015418 contig	68	1	0.00256101	AAGE02015418	26552	Stegomyia aegypti	Aedes aegypti
AAGE02010084 contig	253	1	0.00256016	AAGE02010084	98822	Stegomyia aegypti	Aedes aegypti
AAGE02029780 contig	156	1	0.00255775	AAGE02029780	60991	Stegomyia aegypti	Aedes aegypti
AAGE02012366 contig	46	1	0.00254848	AAGE02012366	18050	Stegomyia aegypti	Aedes aegypti
AAGE02010886 contig	170	1	0.00254762	AAGE02010886	66728	Stegomyia aegypti	Aedes aegypti
AAGE02000381 contig	302	2	0.00254725	AAGE02000381	118952	Stegomyia aegypti	Aedes aegypti
AAGE02021913 contig	266	1	0.00254723	AAGE02021913	104427	Stegomyia aegypti	Aedes aegypti
AAGE02014225 contig	296	1	0.00254591	AAGE02014225	116263	Stegomyia aegypti	Aedes aegypti
AAGE02017498 contig	134	1	0.00254516	AAGE02017498	52649	Stegomyia aegypti	Aedes aegypti
AAGE02007124 contig	235	2	0.00254205	AAGE02007124	93232	Stegomyia aegypti	Aedes aegypti
AAGE02028601 contig	127	1	0.00254137	AAGE02028601	49973	Stegomyia aegypti	Aedes aegypti
AAGE02011406 contig	65	1	0.00254015	AAGE02011406	25589	Stegomyia aegypti	Aedes aegypti
AAGE02023743 contig	349	4	0.0025387	AAGE02023743	246187	Stegomyia aegypti	Aedes aegypti
AAGE02013702 contig	165	1	0.00253647	AAGE02013702	65051	Stegomyia aegypti	Aedes aegypti
AAGE02027855 contig	255	1	0.00253582	AAGE02027855	100559	Stegomyia aegypti	Aedes aegypti
AAGE02011904 contig	392	2	0.00253495	AAGE02011904	154635	Stegomyia aegypti	Aedes aegypti
AAGE02003133 contig	544	3	0.00253222	AAGE02003133	214831	Stegomyia aegypti	Aedes aegypti
AAGE02016477 contig	590	3	0.00253012	AAGE02016477	233584	Stegomyia aegypti	Aedes aegypti
AAGE02026278 contig	270	1	0.00252944	AAGE02026278	106743	Stegomyia aegypti	Aedes aegypti
AAGE02014768 contig	137	1	0.00252604	AAGE02014768	54234	Stegomyia aegypti	Aedes aegypti
AAGE02005797 contig	253	1	0.00252435	AAGE02005797	100222	Stegomyia aegypti	Aedes aegypti
AAGE02016265 contig	270	4	0.00252349	AAGE02016265	164848	Stegomyia aegypti	Aedes aegypti
AAGE02003924 contig	191	1	0.00252262	AAGE02003924	75715	Stegomyia aegypti	Aedes aegypti
AAGE02012498 contig	248	1	0.00252091	AAGE02012498	98376	Stegomyia aegypti	Aedes aegypti
AAGE02010100 contig	146	2	0.0025205	AAGE02010100	115850	Stegomyia aegypti	Aedes aegypti
AAGE02012824 contig	389	2	0.00251936	AAGE02012824	155592	Stegomyia aegypti	Aedes aegypti
AAGE02003305 contig	445	2	0.00251491	AAGE02003305	177740	Stegomyia aegypti	Aedes aegypti
AAGE02014883 contig	168	1	0.00250447	AAGE02014883	67080	Stegomyia aegypti	Aedes aegypti
AAGE02027536 contig	372	3	0.00250427	AAGE02027536	148543	Stegomyia aegypti	Aedes aegypti
AAGE02028712 contig	39	1	0.00250257	AAGE02028712	15584	Stegomyia aegypti	Aedes aegypti
AAGE02021571 contig	221	1	0.00249868	AAGE02021571	88847	Stegomyia aegypti	Aedes aegypti
AAGE02028180 contig	278	1	0.00249737	AAGE02028180	111317	Stegomyia aegypti	Aedes aegypti
AAGE02001632 contig	760	5	0.002495	AAGE02001632	304609	Stegomyia aegypti	Aedes aegypti
AAGE02009698 contig	290	3	0.00249231	AAGE02009698	179352	Stegomyia aegypti	Aedes aegypti
AAGE02005921 contig	143	1	0.00249133	AAGE02005921	57399	Stegomyia aegypti	Aedes aegypti
AAGE02028456 contig	279	1	0.0024913	AAGE02028456	112381	Stegomyia aegypti	Aedes aegypti
AAGE02003230 contig	59	1	0.00248108	AAGE02003230	23780	Stegomyia aegypti	Aedes aegypti
AAGE02005300 contig	549	3	0.00247835	AAGE02005300	222323	Stegomyia aegypti	Aedes aegypti
AAGE02023420 contig	157	2	0.00247417	AAGE02023420	126911	Stegomyia aegypti	Aedes aegypti
AAGE02004325 contig	500	4	0.002474	AAGE02004325	202102	Stegomyia aegypti	Aedes aegypti
AAGE02011028 contig	204	1	0.00247141	AAGE02011028	82544	Stegomyia aegypti	Aedes aegypti
AAGE02018538 contig	70	1	0.00246905	AAGE02018538	28351	Stegomyia aegypti	Aedes aegypti
AAGE02017577 contig	170	2	0.00246515	AAGE02017577	69367	Stegomyia aegypti	Aedes aegypti
AAGE02028956 contig	49	1	0.00246504	AAGE02028956	19877	Stegomyia aegypti	Aedes aegypti
AAGE02017159 contig	287	1	0.00246075	AAGE02017159	116627	Stegomyia aegypti	Aedes aegypti
AAGE02007803 contig	559	3	0.00246029	AAGE02007803	227610	Stegomyia aegypti	Aedes aegypti
AAGE02017464 contig	60	1	0.00245972	AAGE02017464	24393	Stegomyia aegypti	Aedes aegypti
AAGE02005967 contig	137	1	0.00245947	AAGE02005967	55703	Stegomyia aegypti	Aedes aegypti
AAGE02005227 contig	594	3	0.00245875	AAGE02005227	242803	Stegomyia aegypti	Aedes aegypti
AAGE02007734 contig	139	1	0.00245861	AAGE02007734	56536	Stegomyia aegypti	Aedes aegypti
AAGE02002801 contig	169	1	0.00245565	AAGE02002801	68818	Stegomyia aegypti	Aedes aegypti
AAGE02028338 contig	174	2	0.00245215	AAGE02028338	70958	Stegomyia aegypti	Aedes aegypti
AAGE02032558 contig	52	1	0.00245121	AAGE02032558	21213	Stegomyia aegypti	Aedes aegypti
AAGE02026091 contig	190	1	0.0024494	AAGE02026091	77570	Stegomyia aegypti	Aedes aegypti
AAGE02006282 contig	200	1	0.00244738	AAGE02006282	81720	Stegomyia aegypti	Aedes aegypti
AAGE02013279 contig	260	1	0.00244345	AAGE02013279	106813	Stegomyia aegypti	Aedes aegypti
AAGE02000078 contig	244	1	0.00244132	AAGE02000078	99946	Stegomyia aegypti	Aedes aegypti
AAGE02000955 contig	335	2	0.00243973	AAGE02000955	137309	Stegomyia aegypti	Aedes aegypti
AAGE02012329 contig	304	2	0.00243944	AAGE02012329	124619	Stegomyia aegypti	Aedes aegypti
AAGE02009236 contig	271	1	0.00243929	AAGE02009236	111508	Stegomyia aegypti	Aedes aegypti
AAGE02006941 contig	257	1	0.00243526	AAGE02006941	105532	Stegomyia aegypti	Aedes aegypti
AAGE02013214 contig	74	1	0.00243485	AAGE02013214	30392	Stegomyia aegypti	Aedes aegypti
AAGE02028642 contig	53	1	0.00243376	AAGE02028642	21777	Stegomyia aegypti	Aedes aegypti
AAGE02002749 contig	525	3	0.00243321	AAGE02002749	216175	Stegomyia aegypti	Aedes aegypti
AAGE02012016 contig	185	1	0.00243293	AAGE02012016	76039	Stegomyia aegypti	Aedes aegypti
AAGE02003177 contig	61	1	0.00243252	AAGE02003177	25488	Stegomyia aegypti	Aedes aegypti
AAGE02019558 contig	103	1	0.00242501	AAGE02019558	42472	Stegomyia aegypti	Aedes aegypti
AAGE02005279 contig	92	1	0.0024238	AAGE02005279	37957	Stegomyia aegypti	Aedes aegypti
AAGE02006745 contig	196	1	0.00242359	AAGE02006745	81697	Stegomyia aegypti	Aedes aegypti
AAGE02005197 contig	82	2	0.00242285	AAGE02005197	67689	Stegomyia aegypti	Aedes aegypti
AAGE02015211 contig	259	1	0.00241923	AAGE02015211	107059	Stegomyia aegypti	Aedes aegypti
AAGE02023144 contig	268	1	0.00241674	AAGE02023144	111305	Stegomyia aegypti	Aedes aegypti
AAGE02013573 contig	86	1	0.00241621	AAGE02013573	35593	Stegomyia aegypti	Aedes aegypti
AAGE02019013 contig	197	1	0.0024149	AAGE02019013	81577	Stegomyia aegypti	Aedes aegypti
AAGE02005721 contig	143	4	0.00241463	AAGE02005721	115955	Stegomyia aegypti	Aedes aegypti
AAGE02027470 contig	258	1	0.00241419	AAGE02027470	106868	Stegomyia aegypti	Aedes aegypti
AAGE02012348 contig	133	1	0.00241349	AAGE02012348	55107	Stegomyia aegypti	Aedes aegypti
AAGE02001491 contig	114	1	0.00240949	AAGE02001491	47728	Stegomyia aegypti	Aedes aegypti
AAGE02011031 contig	85	1	0.00240732	AAGE02011031	35309	Stegomyia aegypti	Aedes aegypti
AAGE02000527 contig	236	1	0.00240448	AAGE02000527	98566	Stegomyia aegypti	Aedes aegypti
AAGE02001380 contig	421	2	0.00240302	AAGE02001380	175196	Stegomyia aegypti	Aedes aegypti
AAGE02001319 contig	199	1	0.00240164	AAGE02001319	82860	Stegomyia aegypti	Aedes aegypti
AAGE02010723 contig	133	1	0.00240085	AAGE02010723	55397	Stegomyia aegypti	Aedes aegypti
AAGE02009210 contig	704	8	0.00240081	AAGE02009210	493991	Stegomyia aegypti	Aedes aegypti
AAGE02008204 contig	795	4	0.00239884	AAGE02008204	331820	Stegomyia aegypti	Aedes aegypti
AAGE02021420 contig	249	1	0.00239845	AAGE02021420	103817	Stegomyia aegypti	Aedes aegypti
AAGE02019718 contig	232	1	0.00239664	AAGE02019718	96801	Stegomyia aegypti	Aedes aegypti
AAGE02004363 contig	581	3	0.00239529	AAGE02004363	242558	Stegomyia aegypti	Aedes aegypti
AAGE02001659 contig	389	3	0.00238953	AAGE02001659	163212	Stegomyia aegypti	Aedes aegypti
AAGE02003703 contig	246	2	0.00238474	AAGE02003703	103156	Stegomyia aegypti	Aedes aegypti
AAGE02004140 contig	79	1	0.00238471	AAGE02004140	33546	Stegomyia aegypti	Aedes aegypti
AAGE02000060 contig	255	1	0.0023774	AAGE02000060	107260	Stegomyia aegypti	Aedes aegypti
AAGE02028365 contig	156	1	0.00237548	AAGE02028365	65671	Stegomyia aegypti	Aedes aegypti
AAGE02022000 contig	92	1	0.0023737	AAGE02022000	38757	Stegomyia aegypti	Aedes aegypti
AAGE02028390 contig	226	1	0.00237293	AAGE02028390	95241	Stegomyia aegypti	Aedes aegypti
AAGE02022900 contig	258	1	0.00236821	AAGE02022900	108943	Stegomyia aegypti	Aedes aegypti
AAGE02001406 contig	62	1	0.00236494	AAGE02001406	27062	Stegomyia aegypti	Aedes aegypti
AAGE02016466 contig	166	1	0.00236198	AAGE02016466	70279	Stegomyia aegypti	Aedes aegypti
AAGE02025188 contig	48	1	0.00235977	AAGE02025188	20341	Stegomyia aegypti	Aedes aegypti
AAGE02030015 contig	180	1	0.00235757	AAGE02030015	76774	Stegomyia aegypti	Aedes aegypti
AAGE02013288 contig	261	1	0.00235438	AAGE02013288	110857	Stegomyia aegypti	Aedes aegypti
AAGE02012161 contig	57	1	0.0023511	AAGE02012161	24244	Stegomyia aegypti	Aedes aegypti
AAGE02016360 contig	704	4	0.00235073	AAGE02016360	321174	Stegomyia aegypti	Aedes aegypti
AAGE02020983 contig	284	2	0.00234944	AAGE02020983	120880	Stegomyia aegypti	Aedes aegypti
AAGE02014681 contig	91	1	0.00234808	AAGE02014681	38755	Stegomyia aegypti	Aedes aegypti
AAGE02008503 contig	248	1	0.00234241	AAGE02008503	105870	Stegomyia aegypti	Aedes aegypti
AAGE02007430 contig	161	1	0.0023391	AAGE02007430	68830	Stegomyia aegypti	Aedes aegypti
AAGE02013856 contig	257	1	0.00233573	AAGE02013856	110030	Stegomyia aegypti	Aedes aegypti
AAGE02003850 contig	530	2	0.00233184	AAGE02003850	227287	Stegomyia aegypti	Aedes aegypti
AAGE02004333 contig	1259	8	0.00232779	AAGE02004333	540854	Stegomyia aegypti	Aedes aegypti
AAGE02022371 contig	336	2	0.00232706	AAGE02022371	144388	Stegomyia aegypti	Aedes aegypti
AAGE02013354 contig	249	2	0.00232454	AAGE02013354	107118	Stegomyia aegypti	Aedes aegypti
AAGE02010804 contig	118	1	0.00232197	AAGE02010804	50819	Stegomyia aegypti	Aedes aegypti
AAGE02031607 contig	137	1	0.00232129	AAGE02031607	59019	Stegomyia aegypti	Aedes aegypti
AAGE02004978 contig	376	3	0.00231972	AAGE02004978	225027	Stegomyia aegypti	Aedes aegypti
AAGE02009066 contig	146	1	0.002315	AAGE02009066	63499	Stegomyia aegypti	Aedes aegypti
AAGE02017532 contig	104	1	0.00231116	AAGE02017532	44999	Stegomyia aegypti	Aedes aegypti
AAGE02014602 contig	168	1	0.00231061	AAGE02014602	72707	Stegomyia aegypti	Aedes aegypti
AAGE02017380 contig	97	4	0.00230968	AAGE02017380	167989	Stegomyia aegypti	Aedes aegypti
AAGE02010163 contig	170	1	0.0023095	AAGE02010163	73609	Stegomyia aegypti	Aedes aegypti
AAGE02011280 contig	409	5	0.00230249	AAGE02011280	241476	Stegomyia aegypti	Aedes aegypti
AAGE02007269 contig	361	2	0.00229701	AAGE02007269	158466	Stegomyia aegypti	Aedes aegypti
AAGE02007386 contig	627	4	0.00229662	AAGE02007386	335275	Stegomyia aegypti	Aedes aegypti
AAGE02002616 contig	512	2	0.00229197	AAGE02002616	223387	Stegomyia aegypti	Aedes aegypti
AAGE02004020 contig	68	5	0.00228929	AAGE02004020	76440	Stegomyia aegypti	Aedes aegypti
AAGE02013015 contig	93	2	0.00228794	AAGE02013015	41522	Stegomyia aegypti	Aedes aegypti
AAGE02016047 contig	143	1	0.00228481	AAGE02016047	63024	Stegomyia aegypti	Aedes aegypti
AAGE02013606 contig	262	1	0.00228225	AAGE02013606	114799	Stegomyia aegypti	Aedes aegypti
AAGE02017539 contig	541	5	0.00228054	AAGE02017539	237225	Stegomyia aegypti	Aedes aegypti
AAGE02021537 contig	182	1	0.00227922	AAGE02021537	79851	Stegomyia aegypti	Aedes aegypti
AAGE02005353 contig	95	2	0.00227777	AAGE02005353	83414	Stegomyia aegypti	Aedes aegypti
AAGE02014452 contig	77	1	0.00227367	AAGE02014452	33866	Stegomyia aegypti	Aedes aegypti
AAGE02025974 contig	177	2	0.00227349	AAGE02025974	77854	Stegomyia aegypti	Aedes aegypti
AAGE02017828 contig	131	1	0.0022694	AAGE02017828	59487	Stegomyia aegypti	Aedes aegypti
AAGE02012569 contig	379	3	0.00226745	AAGE02012569	230655	Stegomyia aegypti	Aedes aegypti
AAGE02008981 contig	482	2	0.00226736	AAGE02008981	213903	Stegomyia aegypti	Aedes aegypti
AAGE02018744 contig	134	1	0.00226692	AAGE02018744	59111	Stegomyia aegypti	Aedes aegypti
AAGE02004991 contig	432	2	0.00226679	AAGE02004991	190578	Stegomyia aegypti	Aedes aegypti
AAGE02018905 contig	236	1	0.00226533	AAGE02018905	104178	Stegomyia aegypti	Aedes aegypti
AAGE02018095 contig	143	1	0.00225712	AAGE02018095	63355	Stegomyia aegypti	Aedes aegypti
AAGE02012994 contig	171	1	0.00225692	AAGE02012994	75767	Stegomyia aegypti	Aedes aegypti
AAGE02019011 contig	400	2	0.00225676	AAGE02019011	177243	Stegomyia aegypti	Aedes aegypti
AAGE02020304 contig	159	1	0.00225479	AAGE02020304	71847	Stegomyia aegypti	Aedes aegypti
AAGE02003209 contig	280	1	0.00225176	AAGE02003209	124345	Stegomyia aegypti	Aedes aegypti
AAGE02003649 contig	370	4	0.0022513	AAGE02003649	275397	Stegomyia aegypti	Aedes aegypti
AAGE02000035 contig	132	1	0.00225125	AAGE02000035	58634	Stegomyia aegypti	Aedes aegypti
AAGE02005237 contig	398	3	0.00225093	AAGE02005237	176816	Stegomyia aegypti	Aedes aegypti
AAGE02022575 contig	395	3	0.00224871	AAGE02022575	175653	Stegomyia aegypti	Aedes aegypti
AAGE02023457 contig	271	1	0.00224758	AAGE02023457	120574	Stegomyia aegypti	Aedes aegypti
AAGE02013904 contig	243	1	0.00224709	AAGE02013904	108140	Stegomyia aegypti	Aedes aegypti
AAGE02011647 contig	40	1	0.00224341	AAGE02011647	17830	Stegomyia aegypti	Aedes aegypti
AAGE02027588 contig	389	4	0.00224213	AAGE02027588	221218	Stegomyia aegypti	Aedes aegypti
AAGE02001572 contig	359	2	0.00223913	AAGE02001572	160330	Stegomyia aegypti	Aedes aegypti
AAGE02004551 contig	471	3	0.0022374	AAGE02004551	210512	Stegomyia aegypti	Aedes aegypti
AAGE02017903 contig	236	1	0.00223571	AAGE02017903	106901	Stegomyia aegypti	Aedes aegypti
AAGE02003496 contig	300	5	0.00223424	AAGE02003496	471295	Stegomyia aegypti	Aedes aegypti
AAGE02021241 contig	62	1	0.00223327	AAGE02021241	27762	Stegomyia aegypti	Aedes aegypti
AAGE02000717 contig	153	1	0.00223325	AAGE02000717	68510	Stegomyia aegypti	Aedes aegypti
AAGE02020044 contig	243	1	0.00222731	AAGE02020044	109099	Stegomyia aegypti	Aedes aegypti
AAGE02009556 contig	229	1	0.00222514	AAGE02009556	102915	Stegomyia aegypti	Aedes aegypti
AAGE02008369 contig	218	1	0.00222476	AAGE02008369	97988	Stegomyia aegypti	Aedes aegypti
AAGE02020162 contig	209	1	0.00222392	AAGE02020162	93978	Stegomyia aegypti	Aedes aegypti
AAGE02024952 contig	242	1	0.00222388	AAGE02024952	108819	Stegomyia aegypti	Aedes aegypti
AAGE02010635 contig	193	1	0.00222322	AAGE02010635	86811	Stegomyia aegypti	Aedes aegypti
AAGE02017919 contig	190	1	0.00222074	AAGE02017919	85556	Stegomyia aegypti	Aedes aegypti
AAGE02015585 contig	276	1	0.00221906	AAGE02015585	124377	Stegomyia aegypti	Aedes aegypti
AAGE02000984 contig	268	1	0.00221851	AAGE02000984	120802	Stegomyia aegypti	Aedes aegypti
AAGE02028958 contig	272	1	0.00221849	AAGE02028958	122602	Stegomyia aegypti	Aedes aegypti
AAGE02013556 contig	102	1	0.0022146	AAGE02013556	46058	Stegomyia aegypti	Aedes aegypti
AAGE02010344 contig	248	1	0.00221211	AAGE02010344	112110	Stegomyia aegypti	Aedes aegypti
AAGE02016690 contig	329	2	0.00221206	AAGE02016690	148730	Stegomyia aegypti	Aedes aegypti
AAGE02027958 contig	229	1	0.00221198	AAGE02027958	103527	Stegomyia aegypti	Aedes aegypti
AAGE02008114 contig	169	1	0.00220851	AAGE02008114	76972	Stegomyia aegypti	Aedes aegypti
AAGE02000086 contig	68	2	0.00220765	AAGE02000086	30802	Stegomyia aegypti	Aedes aegypti
AAGE02013577 contig	246	1	0.00220687	AAGE02013577	111470	Stegomyia aegypti	Aedes aegypti
AAGE02011006 contig	241	2	0.00220537	AAGE02011006	109732	Stegomyia aegypti	Aedes aegypti
AAGE02008211 contig	267	2	0.00219827	AAGE02008211	243826	Stegomyia aegypti	Aedes aegypti
AAGE02001516 contig	114	3	0.00219614	AAGE02001516	76498	Stegomyia aegypti	Aedes aegypti
AAGE02008137 contig	147	1	0.00219174	AAGE02008137	67070	Stegomyia aegypti	Aedes aegypti
AAGE02005037 contig	266	1	0.00218991	AAGE02005037	121465	Stegomyia aegypti	Aedes aegypti
AAGE02024138 contig	790	3	0.00218523	AAGE02024138	362430	Stegomyia aegypti	Aedes aegypti
AAGE02000266 contig	374	2	0.00218479	AAGE02000266	171640	Stegomyia aegypti	Aedes aegypti
AAGE02004246 contig	201	2	0.00218275	AAGE02004246	92544	Stegomyia aegypti	Aedes aegypti
AAGE02008433 contig	253	1	0.0021822	AAGE02008433	115932	Stegomyia aegypti	Aedes aegypti
AAGE02011997 contig	139	1	0.00218049	AAGE02011997	63747	Stegomyia aegypti	Aedes aegypti
AAGE02017109 contig	260	1	0.0021787	AAGE02017109	119337	Stegomyia aegypti	Aedes aegypti
AAGE02002620 contig	205	1	0.00216585	AAGE02002620	94647	Stegomyia aegypti	Aedes aegypti
AAGE02019133 contig	56	1	0.00216141	AAGE02019133	25909	Stegomyia aegypti	Aedes aegypti
AAGE02010009 contig	210	1	0.00216067	AAGE02010009	97192	Stegomyia aegypti	Aedes aegypti
AAGE02023680 contig	180	1	0.00215489	AAGE02023680	83527	Stegomyia aegypti	Aedes aegypti
AAGE02024042 contig	559	2	0.00215484	AAGE02024042	259410	Stegomyia aegypti	Aedes aegypti
AAGE02000021 contig	252	2	0.00214955	AAGE02000021	117234	Stegomyia aegypti	Aedes aegypti
AAGE02003242 contig	85	1	0.0021493	AAGE02003242	40013	Stegomyia aegypti	Aedes aegypti
AAGE02009245 contig	180	2	0.00214576	AAGE02009245	167773	Stegomyia aegypti	Aedes aegypti
AAGE02010109 contig	58	2	0.00214236	AAGE02010109	54146	Stegomyia aegypti	Aedes aegypti
AAGE02029733 contig	263	1	0.00213696	AAGE02029733	123069	Stegomyia aegypti	Aedes aegypti
AAGE02022770 contig	110	1	0.00213142	AAGE02022770	52077	Stegomyia aegypti	Aedes aegypti
AAGE02002836 contig	151	1	0.00213093	AAGE02002836	70860	Stegomyia aegypti	Aedes aegypti
AAGE02013853 contig	173	1	0.00212879	AAGE02013853	81267	Stegomyia aegypti	Aedes aegypti
AAGE02003877 contig	293	1	0.00212433	AAGE02003877	137926	Stegomyia aegypti	Aedes aegypti
AAGE02007718 contig	87	1	0.00212345	AAGE02007718	40971	Stegomyia aegypti	Aedes aegypti
AAGE02004599 contig	259	1	0.00212337	AAGE02004599	121975	Stegomyia aegypti	Aedes aegypti
AAGE02005508 contig	271	1	0.00211909	AAGE02005508	128357	Stegomyia aegypti	Aedes aegypti
AAGE02010502 contig	93	1	0.00211239	AAGE02010502	44026	Stegomyia aegypti	Aedes aegypti
AAGE02005117 contig	268	1	0.00210942	AAGE02005117	127049	Stegomyia aegypti	Aedes aegypti
AAGE02015112 contig	57	1	0.00210904	AAGE02015112	28449	Stegomyia aegypti	Aedes aegypti
AAGE02015275 contig	249	1	0.00210512	AAGE02015275	118281	Stegomyia aegypti	Aedes aegypti
AAGE02004274 contig	548	6	0.002105	AAGE02004274	308307	Stegomyia aegypti	Aedes aegypti
AAGE02014815 contig	175	1	0.00209852	AAGE02014815	83392	Stegomyia aegypti	Aedes aegypti
AAGE02019812 contig	246	1	0.00209565	AAGE02019812	117386	Stegomyia aegypti	Aedes aegypti
AAGE02006620 contig	154	1	0.00209447	AAGE02006620	73527	Stegomyia aegypti	Aedes aegypti
AAGE02006669 contig	90	1	0.00209405	AAGE02006669	42979	Stegomyia aegypti	Aedes aegypti
AAGE02015933 contig	74	3	0.00209361	AAGE02015933	106037	Stegomyia aegypti	Aedes aegypti
AAGE02016464 contig	561	2	0.00209139	AAGE02016464	269197	Stegomyia aegypti	Aedes aegypti
AAGE02007578 contig	189	1	0.00209089	AAGE02007578	90392	Stegomyia aegypti	Aedes aegypti
AAGE02025927 contig	176	1	0.00209057	AAGE02025927	84666	Stegomyia aegypti	Aedes aegypti
AAGE02018396 contig	46	2	0.00209005	AAGE02018396	44018	Stegomyia aegypti	Aedes aegypti
AAGE02015829 contig	269	2	0.00208957	AAGE02015829	129209	Stegomyia aegypti	Aedes aegypti
AAGE02016371 contig	431	4	0.00208808	AAGE02016371	346730	Stegomyia aegypti	Aedes aegypti
AAGE02023609 contig	104	1	0.00208358	AAGE02023609	49914	Stegomyia aegypti	Aedes aegypti
AAGE02000033 contig	153	1	0.00208228	AAGE02000033	73477	Stegomyia aegypti	Aedes aegypti
AAGE02015327 contig	585	4	0.00207913	AAGE02015327	362170	Stegomyia aegypti	Aedes aegypti
AAGE02013643 contig	179	1	0.00207527	AAGE02013643	86254	Stegomyia aegypti	Aedes aegypti
AAGE02025458 contig	291	1	0.0020746	AAGE02025458	140268	Stegomyia aegypti	Aedes aegypti
AAGE02026172 contig	243	1	0.0020734	AAGE02026172	117199	Stegomyia aegypti	Aedes aegypti
AAGE02025230 contig	167	1	0.00207328	AAGE02025230	81031	Stegomyia aegypti	Aedes aegypti
AAGE02005971 contig	166	1	0.0020714	AAGE02005971	80139	Stegomyia aegypti	Aedes aegypti
AAGE02020174 contig	481	3	0.00207117	AAGE02020174	233198	Stegomyia aegypti	Aedes aegypti
AAGE02008244 contig	264	1	0.00206788	AAGE02008244	127667	Stegomyia aegypti	Aedes aegypti
AAGE02022143 contig	229	1	0.00206582	AAGE02022143	110852	Stegomyia aegypti	Aedes aegypti
AAGE02004520 contig	171	1	0.00205769	AAGE02004520	83103	Stegomyia aegypti	Aedes aegypti
AAGE02012880 contig	99	1	0.00205757	AAGE02012880	48115	Stegomyia aegypti	Aedes aegypti
AAGE02009708 contig	133	1	0.00205593	AAGE02009708	64691	Stegomyia aegypti	Aedes aegypti
AAGE02002305 contig	257	1	0.00205475	AAGE02002305	125076	Stegomyia aegypti	Aedes aegypti
AAGE02002632 contig	418	2	0.00205462	AAGE02002632	203443	Stegomyia aegypti	Aedes aegypti
AAGE02002015 contig	57	2	0.00205343	AAGE02002015	55517	Stegomyia aegypti	Aedes aegypti
AAGE02023115 contig	105	1	0.00205287	AAGE02023115	51148	Stegomyia aegypti	Aedes aegypti
AAGE02022274 contig	210	1	0.002052	AAGE02022274	102339	Stegomyia aegypti	Aedes aegypti
AAGE02001432 contig	54	1	0.00205183	AAGE02001432	26318	Stegomyia aegypti	Aedes aegypti
AAGE02006765 contig	43	3	0.00204464	AAGE02006765	64559	Stegomyia aegypti	Aedes aegypti
AAGE02026182 contig	58	1	0.00204384	AAGE02026182	28378	Stegomyia aegypti	Aedes aegypti
AAGE02005444 contig	395	2	0.00204082	AAGE02005444	195020	Stegomyia aegypti	Aedes aegypti
AAGE02015778 contig	67	2	0.00203877	AAGE02015778	54935	Stegomyia aegypti	Aedes aegypti
AAGE02000643 contig	123	1	0.00203521	AAGE02000643	60436	Stegomyia aegypti	Aedes aegypti
AAGE02001870 contig	171	1	0.00202388	AAGE02001870	84491	Stegomyia aegypti	Aedes aegypti
AAGE02006965 contig	127	1	0.00202342	AAGE02006965	62765	Stegomyia aegypti	Aedes aegypti
AAGE02025620 contig	204	2	0.0020227	AAGE02025620	201711	Stegomyia aegypti	Aedes aegypti
AAGE02000896 contig	422	3	0.0020209	AAGE02000896	208810	Stegomyia aegypti	Aedes aegypti
AAGE02029995 contig	44	1	0.00202067	AAGE02029995	21775	Stegomyia aegypti	Aedes aegypti
AAGE02011337 contig	298	2	0.00202046	AAGE02011337	147490	Stegomyia aegypti	Aedes aegypti
AAGE02018424 contig	261	2	0.00202008	AAGE02018424	129192	Stegomyia aegypti	Aedes aegypti
AAGE02014863 contig	166	1	0.00201975	AAGE02014863	84169	Stegomyia aegypti	Aedes aegypti
AAGE02015159 contig	291	1	0.00201931	AAGE02015159	144604	Stegomyia aegypti	Aedes aegypti
AAGE02016610 contig	281	3	0.00201423	AAGE02016610	420012	Stegomyia aegypti	Aedes aegypti
AAGE02017331 contig	262	1	0.00201223	AAGE02017331	130204	Stegomyia aegypti	Aedes aegypti
AAGE02008912 contig	291	1	0.0020093	AAGE02008912	145321	Stegomyia aegypti	Aedes aegypti
AAGE02012873 contig	324	2	0.00200857	AAGE02012873	161806	Stegomyia aegypti	Aedes aegypti
AAGE02009599 contig	180	1	0.00200723	AAGE02009599	89676	Stegomyia aegypti	Aedes aegypti
AAGE02020755 contig	228	1	0.00200627	AAGE02020755	113637	Stegomyia aegypti	Aedes aegypti
AAGE02001344 contig	357	3	0.00200569	AAGE02001344	203418	Stegomyia aegypti	Aedes aegypti
AAGE02028416 contig	233	2	0.0020047	AAGE02028416	116223	Stegomyia aegypti	Aedes aegypti
AAGE02009223 contig	287	1	0.0020021	AAGE02009223	143849	Stegomyia aegypti	Aedes aegypti
AAGE02009482 contig	318	3	0.00199951	AAGE02009482	159039	Stegomyia aegypti	Aedes aegypti
AAGE02019526 contig	238	1	0.00199938	AAGE02019526	119037	Stegomyia aegypti	Aedes aegypti
AAGE02005359 contig	282	1	0.00199589	AAGE02005359	141290	Stegomyia aegypti	Aedes aegypti
AAGE02010202 contig	525	2	0.0019945	AAGE02010202	265228	Stegomyia aegypti	Aedes aegypti
AAGE02012529 contig	79	1	0.00198872	AAGE02012529	39724	Stegomyia aegypti	Aedes aegypti
AAGE02004745 contig	182	1	0.00198742	AAGE02004745	91576	Stegomyia aegypti	Aedes aegypti
AAGE02023624 contig	267	1	0.00198211	AAGE02023624	134705	Stegomyia aegypti	Aedes aegypti
AAGE02025779 contig	102	1	0.00197893	AAGE02025779	51543	Stegomyia aegypti	Aedes aegypti
AAGE02007455 contig	228	1	0.00197252	AAGE02007455	115588	Stegomyia aegypti	Aedes aegypti
AAGE02010082 contig	190	1	0.00197106	AAGE02010082	96394	Stegomyia aegypti	Aedes aegypti
AAGE02004437 contig	254	1	0.00196907	AAGE02004437	128995	Stegomyia aegypti	Aedes aegypti
AAGE02025835 contig	115	1	0.00196834	AAGE02025835	58425	Stegomyia aegypti	Aedes aegypti
AAGE02010592 contig	167	1	0.0019673	AAGE02010592	84888	Stegomyia aegypti	Aedes aegypti
AAGE02005263 contig	131	1	0.00196399	AAGE02005263	66701	Stegomyia aegypti	Aedes aegypti
[truncated: 1,191 more rows]
